# Supplementary material for: Novel Prenylated Indole Alkaloids with Neuroprotection on SH-SY5Y Cells against Oxidative Stress Targeting Keap1–Nrf2
Source: MDPI journal article supplement (doi:10.3390/md20030191), 2022-03-04

# Novel Prenylated Indole Alkaloids with Neuroprotection on SH-SY5Y Cells against Oxidative Stress Targeting Keap1–Nrf2

Xueyang Xiao <sup>1,†</sup>, Zhou Tong <sup>1,†</sup>, Yuexing Zhang <sup>2,†</sup>, Hui Zhou <sup>1</sup>, Mengying Luo <sup>1</sup>, Tianhui Hu <sup>1</sup>, Ping Hu <sup>1</sup>, Luqi Kong <sup>1</sup>, Zeqin Liu <sup>1</sup>, Chan Yu <sup>1</sup>, Zhiyong Huang <sup>3,\*</sup>, and Linzhen Hu <sup>1,\*</sup>

<sup>1</sup> National & Local Joint Engineering Research Centre of High-Throughput Drug Screening Technology, Hubei Key Laboratory of Biotechnology of Traditional Chinese Medicine, State Key Laboratory of Biocatalysis and Enzyme Engineering, School of Life Sciences, Hubei University, Wuhan 430062, Hubei Province, China; xueyangxiao2021@163.com (X.X.); 202021107011179@stu.hubu.edu.cn (Z.T.); 201822110714021@stu.hubu.edu.cn (H.Z.); 201931107014028@stu.hubu.edu.cn (M.L.); 201931107014041@stu.hubu.edu.cn (T.H.); 13696476116@163.com (P.H.); 202121107012453@stu.hubu.edu.cn (L.K.); 202021107011053@stu.hubu.edu.cn (Z.L.); yuch-an72@hubu.edu.cn (C.Y.)

<sup>2</sup> College of Chemistry and Chemical Engineering, Hubei University, Wuhan 430062, Hubei Province, China; zhangyuexing@sdu.edu.cn

<sup>3</sup> Tianjin Institute of Industrial Biotechnology, Chinese Academy of Sciences, Tianjin 300308, China

<sup>†</sup> These authors contributed equally to this work.

\* Authors to whom correspondence should be addressed; E-mails: huang\_zy@tib.cas.cn (Z. Y. H.), Tel.: +86-22-84861931 (Z. Y. H.); linzhenhu@hubu.edu.cn (L. Z. H.), Tel.: +86-27-88661237-8023 (L. Z. H.)

## Contents

|                                                                                                                                 |    |
|---------------------------------------------------------------------------------------------------------------------------------|----|
| <b>Figure S1.</b> The Coculture and the fermentation of fungi .....                                                             | 3  |
| <b>Figure S2.</b> <i>Penicillium</i> sp. HUBU 0120 and the phylogenetic tree of ITS genes. ....                                 | 3  |
| <b>Figure S3.</b> The experimental ECD spectrum of <b>1</b> . ....                                                              | 3  |
| <b>Table S1.</b> Deviations between the calculated and the experimental <sup>13</sup> C NMR chemical shifts for <b>2</b> . .... | 4  |
| <b>Table S2.</b> Primer information of Keap1, HO-1, NQO-1, and $\beta$ -Actin in the present study.....                         | 4  |
| <b>Quantum-chemical computation for ECD</b> .....                                                                               | 5  |
| <b>Quantum-chemical computation for <sup>13</sup>C NMR</b> .....                                                                | 35 |
| <b>Figure S4.</b> HRESIMS of compound <b>1</b> .....                                                                            | 37 |
| <b>Figure S5.</b> UV of compound <b>1</b> (in MeOH) .....                                                                       | 38 |
| <b>Figure S6.</b> IR of compound <b>1</b> (KBr disc).....                                                                       | 38 |
| <b>Figure S7.</b> <sup>1</sup> H NMR spectrum of compound <b>1</b> (in CDCl <sub>3</sub> ) .....                                | 39 |
| <b>Figure S8.</b> <sup>13</sup> C NMR spectra of compound <b>1</b> (in CDCl <sub>3</sub> ).....                                 | 40 |
| <b>Figure S9.</b> DEPT135 spectrum of compound <b>1</b> (in CDCl <sub>3</sub> ).....                                            | 41 |
| <b>Figure S10.</b> HSQC spectrum of compound <b>1</b> (in CDCl <sub>3</sub> ) .....                                             | 42 |
| <b>Figure S11.</b> HMBC spectrum of compound <b>1</b> (in CDCl <sub>3</sub> ) .....                                             | 43 |
| <b>Figure S12.</b> <sup>1</sup> H- <sup>1</sup> H COSY spectrum of compound <b>1</b> (in CDCl <sub>3</sub> ).....               | 44 |
| <b>Figure S13.</b> NOESY spectrum of compound <b>1</b> (in CDCl <sub>3</sub> ).....                                             | 45 |
| <b>Figure S14.</b> HRESIMS of compound <b>2</b> .....                                                                           | 46 |
| <b>Figure S15.</b> UV of compound <b>2</b> (in MeOH) .....                                                                      | 46 |
| <b>Figure S16.</b> IR of compound <b>2</b> (KBr disc).....                                                                      | 46 |
| <b>Figure S17.</b> <sup>1</sup> H NMR spectrum of compound <b>2</b> (in CDCl <sub>3</sub> ) .....                               | 47 |
| <b>Figure S18.</b> <sup>13</sup> C NMR spectrum of compound <b>2</b> (in CDCl <sub>3</sub> ) .....                              | 48 |
| <b>Figure S19.</b> DEPT135 spectrum of compound <b>2</b> (in CDCl <sub>3</sub> ).....                                           | 49 |
| <b>Figure S20.</b> HSQC spectrum of compound <b>2</b> (in CDCl <sub>3</sub> ) .....                                             | 50 |
| <b>Figure S21.</b> HMBC spectrum of compound <b>2</b> (in CDCl <sub>3</sub> ) .....                                             | 51 |
| <b>Figure S22.</b> <sup>1</sup> H- <sup>1</sup> H COSY spectrum of compound <b>2</b> (in CDCl <sub>3</sub> ).....               | 52 |
| <b>Figure S23.</b> NOESY spectrum of compound <b>2</b> (in CDCl <sub>3</sub> ).....                                             | 53 |

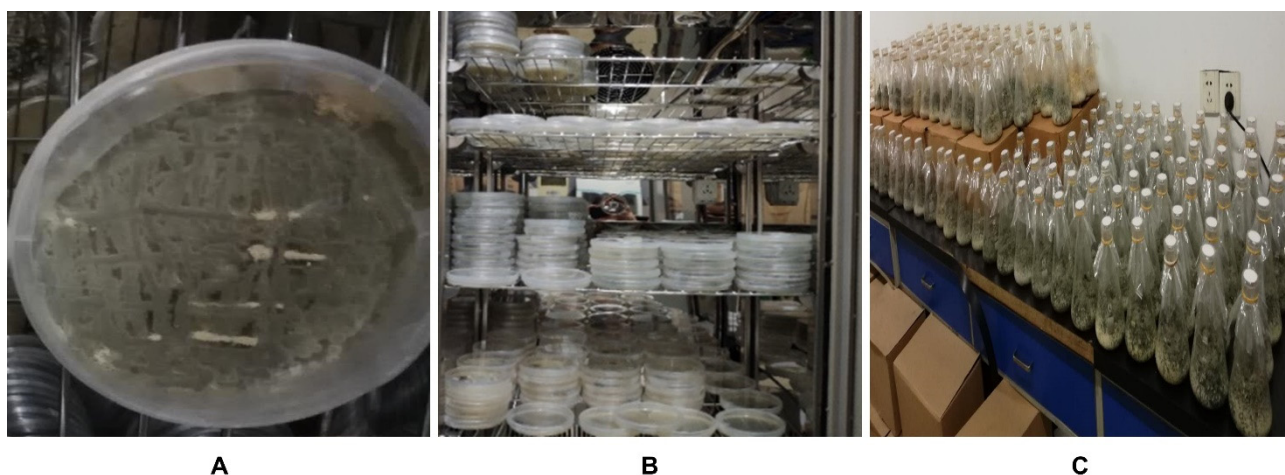

**Figure S1.** The Coculture and the fermentation of fungi. (A) Co-cultured fungi in a plate. (B) co-inoculated on the potato dextrose agar (PDA) in a 25°C incubator for 7 days. (C) the fermentation of fungi in a temperature-controlled room at 25°C for 30 days.

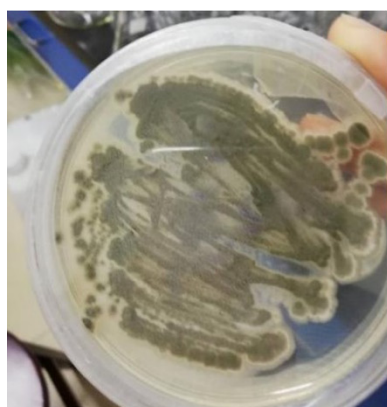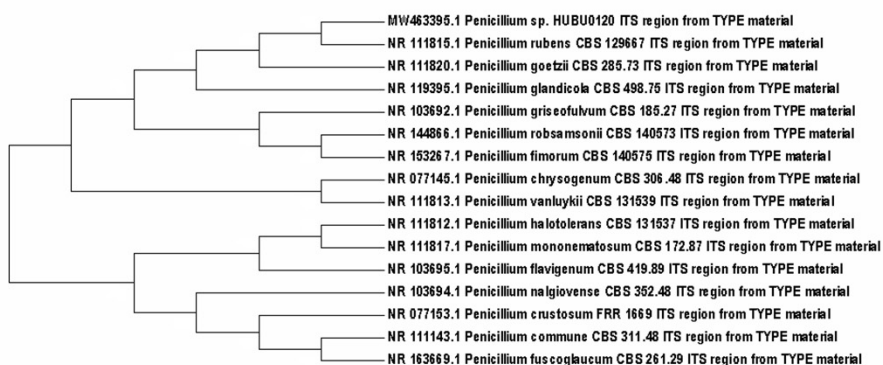

**Figure S2.** *Penicillium* sp. HUBU 0120 and the phylogenetic tree of ITS genes.

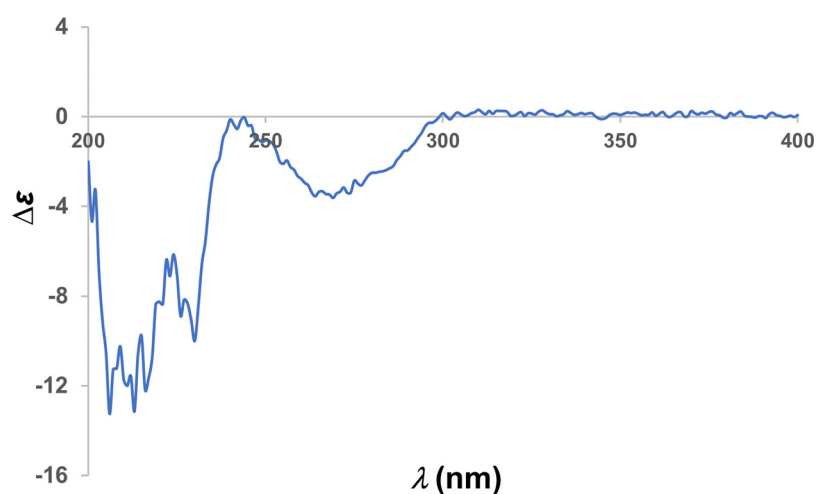

**Figure S3.** The experimental ECD spectrum of 1.

**Table S1.** Deviations between the calculated and the experimental  $^{13}\text{C}$  NMR chemical shifts for **2**.

| C  | exp.   | 2      |            |                |                  |
|----|--------|--------|------------|----------------|------------------|
|    |        | calc.  | scal.calc. | $\Delta\delta$ | $ \Delta\delta $ |
| 2  | 58.46  | 60.20  | 59.22      | 0.76           | 0.76             |
| 4  | 163.01 | 163.14 | 162.11     | -0.90          | 0.90             |
| 5  | 60.14  | 61.92  | 60.94      | 0.80           | 0.80             |
| 7  | 166.56 | 163.50 | 162.47     | -4.09          | 4.09             |
| 8  | 48.87  | 50.75  | 49.78      | 0.91           | 0.91             |
| 9  | 36.37  | 37.55  | 36.58      | 0.21           | 0.21             |
| 10 | 91.13  | 95.85  | 94.85      | 3.72           | 3.72             |
| 11 | 198.37 | 199.75 | 198.70     | 0.33           | 0.33             |
| 12 | 119.57 | 120.64 | 119.63     | 0.06           | 0.06             |
| 13 | 125.53 | 126.07 | 125.05     | -0.48          | 0.48             |
| 14 | 120.33 | 122.32 | 121.31     | 0.98           | 0.98             |
| 15 | 138.69 | 138.00 | 136.97     | -1.72          | 1.72             |
| 16 | 110.73 | 113.45 | 112.44     | 1.71           | 1.71             |
| 17 | 157.69 | 158.08 | 157.05     | -0.64          | 0.64             |
| 18 | 117.92 | 119.45 | 118.44     | 0.52           | 0.52             |
| 19 | 139.36 | 143.63 | 142.61     | 3.25           | 3.25             |
| 20 | 26.06  | 25.38  | 24.42      | -1.64          | 1.64             |
| 21 | 18.78  | 19.08  | 18.11      | -0.68          | 0.68             |
| 22 | 32.15  | 33.67  | 32.70      | 0.55           | 0.55             |
| 23 | 18.66  | 18.33  | 17.37      | -1.29          | 1.29             |
| 24 | 16.01  | 15.83  | 14.87      | -1.14          | 1.14             |
| 25 | 51.96  | 51.82  | 50.84      | -1.12          | 1.12             |
|    |        |        |            | AveDev         | 1.25             |
|    |        |        |            | MaxDev         | 4.09             |

**Table S2.** Primer information of Keap1, HO-1, NQO-1, and  $\beta$ -Actin in the present study.

| Primer Name    | Accession Number | Primer sequence (5' – 3') |                       | Tm (°C) | CG%  | Amplicon Length |
|----------------|------------------|---------------------------|-----------------------|---------|------|-----------------|
| Keap1          | NM_012289.3      | Sense                     | CCAATGCTGACACGAAGGAT  | 58.1    | 50   | 194             |
|                |                  | Antisense                 | ATACAGTTGTGCAGGACGCAG | 58.6    | 52.4 |                 |
| HO-1           | NM_002133.2      | Sense                     | GCCAGCAACAAAGTGCAAGA  | 59.6    | 50   | 100             |
|                |                  | Antisense                 | TAAGGACCCATCGGAGAAGC  | 59.2    | 55   |                 |
| NQO1           | NM_000903.2      | Sense                     | TGGTGGAGTCGGACCTCTATG | 59.7    | 57.1 | 287             |
|                |                  | Antisense                 | CATGGCAGCGTAAGTGTAAGC | 58.8    | 52.4 |                 |
| $\beta$ -Actin | NM_001101        | Sense                     | GTCCACCGCAAATGCTTCTA  | 58.7    | 50   | 190             |
|                |                  | Antisense                 | TGCTGTCACCTTCACCGTTC  | 58.9    | 55   |                 |

## Quantum-chemical computation for ECD

Conformational analyses were carried out whereby both BALLOON and confab programs [1,2] to confirm the stereochemistry structure of **2**. The BALLOON program explores conformational spaces with a genetic algorithm, and synchronously, the confab program systematically generates diverse low energy conformations that are proposed to be close to crystal structures. The conformations generated by the above programs were assembled via the removal of duplicated conformations whose root mean square (RMS) distance was less than 0.5 Å. Semi-empirical PM3 quantum mechanical geometry optimizations were fulfilled on conformations through the Gaussian 16 Revision A.03 [3]. Duplicated conformations after geometry optimization was subsequently identified and disposed. The remaining conformations were further optimized with PBE0 function applying 6-311G(d,p) basis set for C, N, and O atoms and 6-31G(d,p) basis set for H atoms in methanol solvent (IEFPCM solvation model) via Gaussian 16 program. Duplicated conformations emerged after these calculations were removed according to the same RMS criteria above. Harmonic vibrational frequencies were performed to establish the stability of the finally obtained conformers. Oscillator strengths and rotational strengths of 20 weakest electronic excitations of each conformer were calculated by the TDDFT methodology at the cam-b3lyp/def2tzvpp level for **2**, adopting methanol as solvent by the solvation model of IEFPCM for **2**, which were carried out in Gaussian 16 program. The ECD spectra data for each conformer were then simulated by using a Gaussian function with a bandwidth  $\sigma$  of 0.30 eV. Calculated spectra for each conformation were combined after Boltzmann weighting according to their population contribution.

1. M. J. Vainio, M. S. Johnson, **2007**. Generating conformer ensembles using a multiobjective genetic algorithm. *J. Chem. Inf. Model*, *47*, 2462–2474.
2. N. M.O'Boyle, T. Vandermeersch, C. J. Flynn, A. R. Maguire, G. R. Hutchison, **2011**. Confab-systematic generation of diverse low-energy conformers. *J. Cheminformatics*, *3*, 1–9.
3. Gaussian 16, Revision A.03, M. J. Frisch, G. W. Trucks, H. B. Schlegel, G. E. Scuseria, M. A. Robb, J. R. Cheeseman, G. Scalmani, V. Barone, G. A. Petersson, H. Nakatsuji, X. Li, M. Caricato, A. V. Marenich, J. Bloino, B. G. Janesko, R. Gomperts, B. Mennucci, H. P. Hratchian, J. V. Ortiz, A. F. Izmaylov, J. L. Sonnenberg, D. Williams-Young, F. Ding, F. Lipparini, F. Egidi, J. Goings, B. Peng, A. Petrone, T. Henderson, D. Ranasinghe, V. G. Zakrzewski, J. Gao, N. Rega, G. Zheng, W. Liang, M. Hada, M. Ehara, K. Toyota, R. Fukuda, J. Hasegawa, M. Ishida, T. Nakajima, Y. Honda, O. Kitao, H. Nakai, T. Vreven, K. Throssell, J. A. Montgomery, Jr., J. E. Peralta, F. Ogliaro, M. J. Bearpark, J. J. Heyd, E. N. Brothers, K. N. Kudin, V. N. Staroverov, T. A. Keith, R. Kobayashi, J. Normand, K. Raghavachari, A. P. Rendell, J. C. Burant, S. S. Iyengar, J. Tomasi, M. Cossi, J. M. Millam, M. Klene, C. Adamo, R. Cammi, J. W. Ochterski, R. L. Martin, K. Morokuma, O. Farkas, J. B. Foresman, and D. J. Fox, *Gaussian, Inc., Wallingford CT*, **2016**.

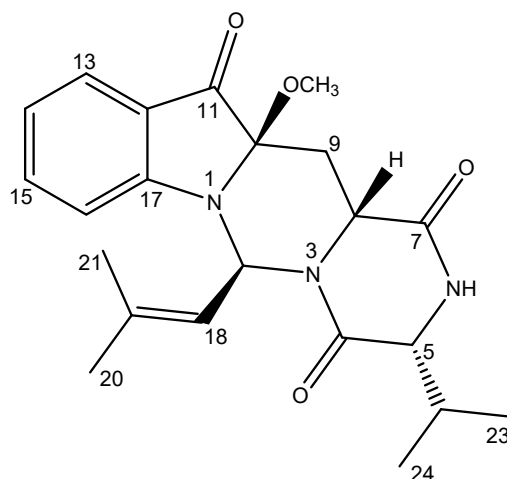

**2S,5R,8R,10R-2**

Optimized geometries of predominant conformers for compound **2S,5R,8R,10R-2** with PBE0 function applying 6-311G(d,p) basis set for C, N, and O atoms and 6-31G(d,p) basis set for H atoms in methanol solvent.

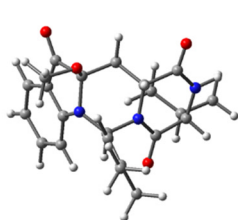

**2S,5R,8R,10R-2A**

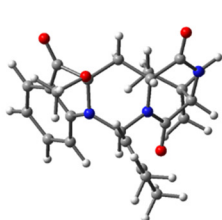

**2S,5R,8R,10R-2B**

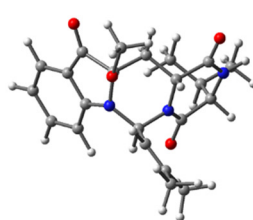

**2S,5R,8R,10R-2C**

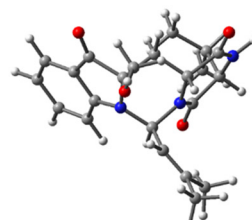

**2S,5R,8R,10R-2D**

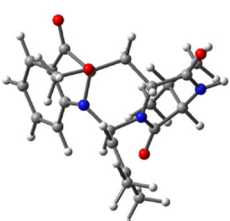

**2S,5R,8R,10R-2E**

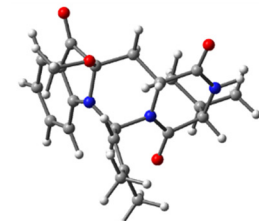

**2S,5R,8R,10R-2F**

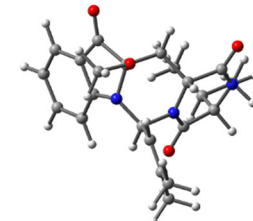

**2S,5R,8R,10R-2G**

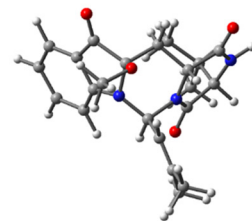

**2S,5R,8R,10R-2H**

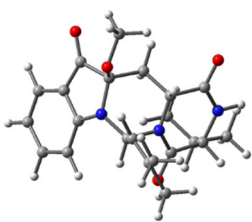

**2S,5R,8R,10R-2I**

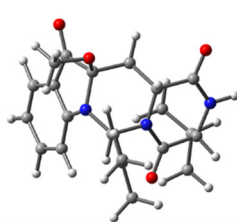

**2S,5R,8R,10R-2J**

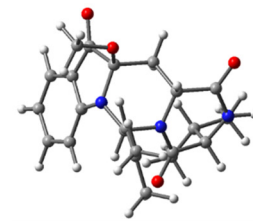

**2S,5R,8R,10R-2K**

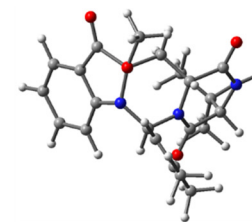

**2S,5R,8R,10R-2L**

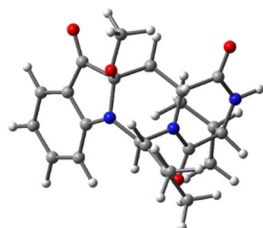

**2S,5R,8R,10R-2M**

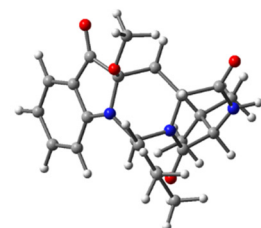

**2S,5R,8R,10R-2N**

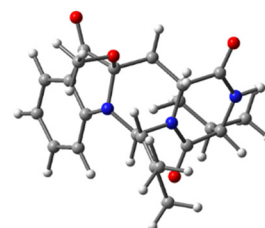

**2S,5R,8R,10R-2O**

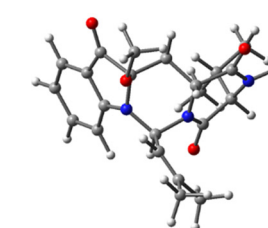

**2S,5R,8R,10R-2P**

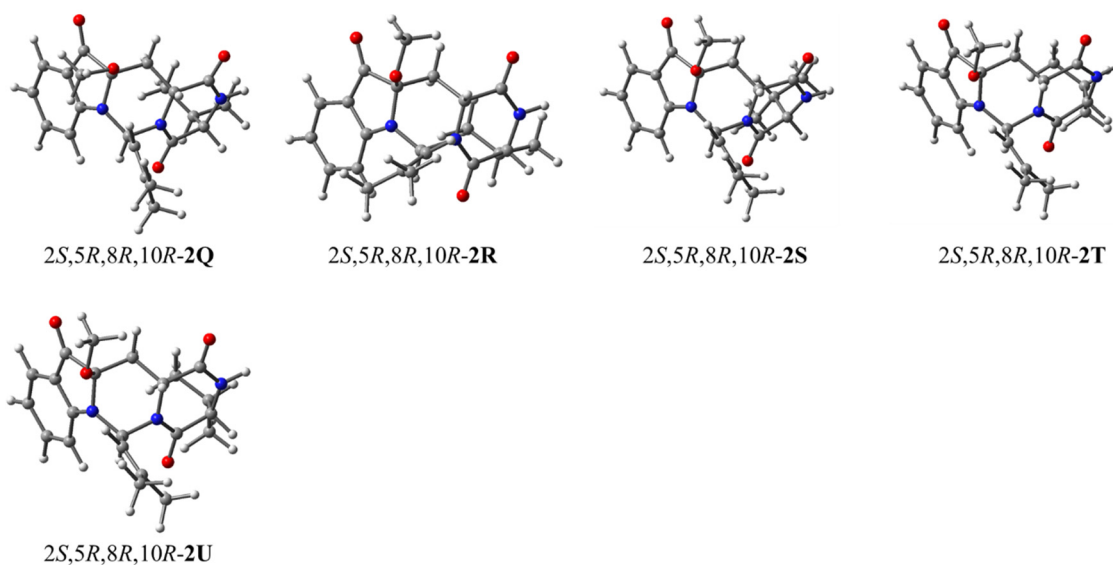

Important thermodynamic parameters (a.u.) and Boltzmann distributions of the optimized compound **2S,5R,8R,10R-2** with PBE0 function applying 6-311G(d,p) basis set for C, N, and O atoms and 6-31G(d,p) basis set for H atoms in methanol solvent.

| Conformations          | E+ZPE        | G            | %      |
|------------------------|--------------|--------------|--------|
| <b>2S,5R,8R,10R-2A</b> | -1318.202186 | -1318.259982 | 15.766 |
| <b>2S,5R,8R,10R-2B</b> | -1318.200728 | -1318.259150 | 6.531  |
| <b>2S,5R,8R,10R-2C</b> | -1318.196436 | -1318.254283 | 0.038  |
| <b>2S,5R,8R,10R-2D</b> | -1318.194843 | -1318.252635 | 0.007  |
| <b>2S,5R,8R,10R-2E</b> | -1318.199226 | -1318.257294 | 0.915  |
| <b>2S,5R,8R,10R-2F</b> | -1318.202185 | -1318.259981 | 15.749 |
| <b>2S,5R,8R,10R-2G</b> | -1318.202184 | -1318.259974 | 15.633 |
| <b>2S,5R,8R,10R-2H</b> | -1318.200723 | -1318.259146 | 6.504  |
| <b>2S,5R,8R,10R-2I</b> | -1318.196435 | -1318.254279 | 0.038  |
| <b>2S,5R,8R,10R-2J</b> | -1318.200719 | -1318.259135 | 6.428  |
| <b>2S,5R,8R,10R-2K</b> | -1318.199227 | -1318.257300 | 0.920  |
| <b>2S,5R,8R,10R-2L</b> | -1318.194842 | -1318.252638 | 0.007  |
| <b>2S,5R,8R,10R-2M</b> | -1318.194845 | -1318.252645 | 0.007  |
| <b>2S,5R,8R,10R-2N</b> | -1318.193456 | -1318.251800 | 0.003  |
| <b>2S,5R,8R,10R-2O</b> | -1318.202183 | -1318.259971 | 15.583 |
| <b>2S,5R,8R,10R-2P</b> | -1318.193453 | -1318.251785 | 0.003  |
| <b>2S,5R,8R,10R-2Q</b> | -1318.202186 | -1318.259987 | 15.849 |
| <b>2S,5R,8R,10R-2R</b> | -1318.194199 | -1318.252603 | 0.006  |
| <b>2S,5R,8R,10R-2S</b> | -1318.193454 | -1318.251786 | 0.003  |
| <b>2S,5R,8R,10R-2T</b> | -1318.194842 | -1318.252631 | 0.007  |
| <b>2S,5R,8R,10R-2U</b> | -1318.194842 | -1318.252634 | 0.007  |

E+ZPE, G: total energy with zero-point energy (ZPE) and Gibbs free energy in methanol solution. %: Boltzmann distributions, using the relative Gibbs free energies as weighting factors.

Optimized Z-matrixes (Å) of compound **2S,5R,8R,10R-2** with PBE0 function applying 6-311G(d,p) basis set for C,

N, and O atoms and 6-31G(d,p) basis set for H atoms in methanol solvent.

| 2S,5R,8R,10R-2A |           |           |           |  | 2S,5R,8R,10R-2B |           |           |           |
|-----------------|-----------|-----------|-----------|--|-----------------|-----------|-----------|-----------|
| C               | -2.801491 | -3.267556 | 1.785982  |  | C               | -3.059642 | -2.983611 | 1.734127  |
| C               | -2.109062 | -2.398858 | 2.64081   |  | C               | -2.14244  | -2.32808  | 2.566952  |
| C               | -1.59201  | -1.184987 | 2.21066   |  | C               | -1.481131 | -1.170248 | 2.181953  |
| C               | -1.784996 | -0.829937 | 0.874113  |  | C               | -1.75865  | -0.65005  | 0.91609   |
| C               | -2.447661 | -1.715971 | 0.006722  |  | C               | -2.650722 | -1.326302 | 0.065469  |
| C               | -2.972681 | -2.925044 | 0.456618  |  | C               | -3.316787 | -2.480054 | 0.471448  |
| N               | -1.418076 | 0.338317  | 0.228676  |  | N               | -1.27557  | 0.508129  | 0.332574  |
| C               | -1.541321 | 0.129696  | -1.221894 |  | C               | -1.585666 | 0.471976  | -1.104534 |
| C               | -2.434688 | -1.134061 | -1.322175 |  | C               | -2.685818 | -0.617231 | -1.199863 |
| C               | -0.330963 | 1.16496   | 0.717213  |  | C               | -0.020645 | 1.101395  | 0.753617  |
| N               | 0.928209  | 0.695992  | 0.128543  |  | N               | 1.071329  | 0.500221  | -0.019596 |
| C               | 0.925381  | 0.699171  | -1.322295 |  | C               | 0.916808  | 0.648514  | -1.453729 |
| C               | -0.18439  | -0.221127 | -1.83477  |  | C               | -0.380187 | -0.025819 | -1.904235 |
| O               | -2.953841 | -1.507243 | -2.35062  |  | O               | -3.3704   | -0.793959 | -2.183006 |
| O               | -2.040809 | 1.235     | -1.899834 |  | O               | -1.959683 | 1.705633  | -1.623098 |
| C               | 1.876644  | 0.159743  | 0.923521  |  | C               | 2.029963  | -0.203668 | 0.619074  |
| C               | 3.111255  | -0.419882 | 0.268276  |  | C               | 3.072165  | -0.908845 | -0.222063 |
| N               | 3.201084  | -0.1491   | -1.15134  |  | N               | 3.060941  | -0.493203 | -1.611124 |
| C               | 2.240307  | 0.31932   | -1.962728 |  | C               | 2.080632  | 0.140505  | -2.273299 |
| C               | -0.57074  | 2.624105  | 0.438104  |  | C               | -0.045123 | 2.599936  | 0.6266    |
| O               | 1.777683  | 0.110825  | 2.143122  |  | O               | 2.076532  | -0.2999   | 1.839295  |
| O               | 2.380866  | 0.449159  | -3.16881  |  | O               | 2.09589   | 0.332919  | -3.479352 |
| C               | -0.071445 | 3.625475  | 1.168687  |  | C               | 0.615465  | 3.442818  | 1.426298  |
| C               | -0.371399 | 5.049833  | 0.81152   |  | C               | 0.512492  | 4.923513  | 1.216361  |
| C               | 0.815544  | 3.44813   | 2.362567  |  | C               | 1.498639  | 3.029491  | 2.563564  |
| C               | 3.195835  | -1.92648  | 0.59728   |  | C               | 2.949455  | -2.448842 | -0.108381 |
| C               | 4.509279  | -2.518255 | 0.10173   |  | C               | 1.569331  | -2.947449 | -0.515852 |
| C               | 1.999748  | -2.700224 | 0.058139  |  | C               | 3.349037  | -2.968285 | 1.266808  |
| H               | 0.721727  | 1.72355   | -1.654122 |  | H               | 0.853898  | 1.720649  | -1.674429 |
| H               | 3.955152  | 0.074894  | 0.761264  |  | H               | 4.034286  | -0.616827 | 0.21095   |
| C               | -3.349918 | 1.622495  | -1.502827 |  | C               | -3.128752 | 2.258782  | -1.032791 |
| H               | -3.186726 | -4.204519 | 2.167643  |  | H               | -3.550883 | -3.884728 | 2.078551  |
| H               | -1.968586 | -2.682288 | 3.67784   |  | H               | -1.937733 | -2.738145 | 3.549483  |
| H               | -1.055648 | -0.548106 | 2.90148   |  | H               | -0.774105 | -0.700787 | 2.853113  |
| H               | -3.485313 | -3.5817   | -0.236669 |  | H               | -4.004537 | -2.972609 | -0.206076 |
| H               | -0.232888 | 0.997033  | 1.78662   |  | H               | 0.160629  | 0.814877  | 1.785821  |
| H               | -0.266691 | -0.148588 | -2.919217 |  | H               | -0.561863 | 0.169465  | -2.961003 |
| H               | 0.066955  | -1.253054 | -1.574884 |  | H               | -0.284658 | -1.105363 | -1.762599 |
| H               | 4.073921  | -0.370632 | -1.609423 |  | H               | 3.822484  | -0.821236 | -2.189583 |
| H               | -1.182431 | 2.853768  | -0.425925 |  | H               | -0.642892 | 3.001574  | -0.183095 |
| H               | -1.021605 | 5.124343  | -0.061496 |  | H               | -0.14976  | 5.173989  | 0.386209  |
| H               | 0.554692  | 5.596719  | 0.604173  |  | H               | 1.500247  | 5.352387  | 1.016131  |
| H               | -0.854786 | 5.560785  | 1.651212  |  | H               | 0.137184  | 5.412493  | 2.121843  |

|   |           |           |           |  |   |           |           |           |
|---|-----------|-----------|-----------|--|---|-----------|-----------|-----------|
| H | 1.024353  | 2.406821  | 2.608105  |  | H | 1.604092  | 1.950139  | 2.671649  |
| H | 0.372141  | 3.936282  | 3.23688   |  | H | 1.121315  | 3.446868  | 3.503321  |
| H | 1.774721  | 3.946265  | 2.183388  |  | H | 2.500505  | 3.448346  | 2.419757  |
| H | 3.181464  | -1.973367 | 1.690436  |  | H | 3.677441  | -2.835301 | -0.832751 |
| H | 4.549164  | -2.546986 | -0.991816 |  | H | 0.796628  | -2.591217 | 0.174178  |
| H | 5.369412  | -1.947709 | 0.463472  |  | H | 1.309405  | -2.630577 | -1.528965 |
| H | 4.614596  | -3.546718 | 0.454332  |  | H | 1.543955  | -4.039241 | -0.500459 |
| H | 2.085215  | -3.757226 | 0.319643  |  | H | 3.388978  | -4.060283 | 1.248603  |
| H | 1.05485   | -2.336378 | 0.473308  |  | H | 4.334936  | -2.597907 | 1.560533  |
| H | 1.951359  | -2.6358   | -1.033398 |  | H | 2.631318  | -2.659678 | 2.028341  |
| H | -3.561806 | 2.55997   | -2.014997 |  | H | -3.236998 | 3.260663  | -1.445782 |
| H | -4.088746 | 0.872737  | -1.800608 |  | H | -4.013667 | 1.666707  | -1.284062 |
| H | -3.401583 | 1.778243  | -0.420761 |  | H | -3.026358 | 2.321488  | 0.054957  |

| 2S,5R,8R,10R-2C |           |           |           | 2S,5R,8R,10R-2D |           |           |           |
|-----------------|-----------|-----------|-----------|-----------------|-----------|-----------|-----------|
| C               | 3.853521  | -2.429997 | -1.655874 | C               | 3.981059  | -2.166577 | -1.50137  |
| C               | 2.97017   | -1.857372 | -2.581729 | C               | 2.924695  | -1.958382 | -2.399077 |
| C               | 2.082264  | -0.847163 | -2.239927 | C               | 1.921824  | -1.027134 | -2.168544 |
| C               | 2.088105  | -0.393531 | -0.91911  | C               | 1.989153  | -0.274101 | -0.994371 |
| C               | 2.95197   | -0.986387 | 0.017567  | C               | 3.02933   | -0.503975 | -0.077863 |
| C               | 3.845459  | -1.991499 | -0.343572 | C               | 4.034922  | -1.433779 | -0.328891 |
| N               | 1.350453  | 0.624975  | -0.351666 | N               | 1.156373  | 0.741629  | -0.569549 |
| C               | 1.494406  | 0.580365  | 1.099469  | C               | 1.44227   | 1.0459    | 0.82962   |
| C               | 2.695311  | -0.377843 | 1.31016   | C               | 2.806589  | 0.351012  | 1.074097  |
| C               | 0.112258  | 1.115975  | -0.922947 | C               | -0.199387 | 0.89778   | -1.058501 |
| N               | -1.018686 | 0.435079  | -0.28216  | N               | -1.11921  | 0.197179  | -0.155273 |
| C               | -1.026619 | 0.567469  | 1.161983  | C               | -1.019217 | 0.643066  | 1.219991  |
| C               | 0.250763  | -0.05294  | 1.729995  | C               | 0.397637  | 0.380556  | 1.731974  |
| O               | 3.247762  | -0.552458 | 2.375382  | O               | 3.486906  | 0.515261  | 2.064244  |
| O               | 1.765872  | 1.888747  | 1.53101   | O               | 1.517351  | 2.442125  | 0.94739   |
| C               | -1.782457 | -0.416332 | -0.998117 | C               | -1.797044 | -0.885831 | -0.593037 |
| C               | -2.887881 | -1.160865 | -0.278742 | C               | -2.672076 | -1.62616  | 0.397754  |
| N               | -3.06474  | -0.758193 | 1.101032  | N               | -2.809798 | -0.938502 | 1.66734   |
| C               | -2.237287 | -0.015167 | 1.851425  | C               | -2.039536 | 0.044369  | 2.158203  |
| C               | 0.004469  | 2.615647  | -0.803621 | C               | -0.563345 | 2.353198  | -1.216251 |
| O               | -1.632393 | -0.600741 | -2.199031 | O               | -1.746144 | -1.271208 | -1.754417 |
| O               | -2.416616 | 0.207145  | 3.038878  | O               | -2.133196 | 0.473404  | 3.298075  |
| C               | -0.871701 | 3.364007  | -1.479773 | C               | -1.621547 | 2.798084  | -1.899858 |
| C               | -0.910187 | 4.850385  | -1.292201 | C               | -1.903922 | 4.266918  | -1.995229 |
| C               | -1.881414 | 2.8182    | -2.442176 | C               | -2.608841 | 1.914436  | -2.598131 |
| C               | -2.66666  | -2.680643 | -0.433967 | C               | -2.198069 | -3.083965 | 0.614185  |
| C               | -3.849643 | -3.463308 | 0.121916  | C               | -0.751446 | -3.153999 | 1.084493  |
| C               | -1.356302 | -3.136473 | 0.194062  | C               | -2.434524 | -3.965097 | -0.605845 |
| H               | -1.042714 | 1.638748  | 1.394915  | H               | -1.211324 | 1.722971  | 1.23039   |
| H               | -3.80152  | -0.901956 | -0.825771 | H               | -3.659402 | -1.663063 | -0.074957 |

|   |           |           |           |   |           |           |           |
|---|-----------|-----------|-----------|---|-----------|-----------|-----------|
| C | 1.728109  | 2.129022  | 2.931691  | C | 1.558367  | 2.978871  | 2.263002  |
| H | 4.527784  | -3.216388 | -1.970278 | H | 4.7401    | -2.90536  | -1.724904 |
| H | 2.97708   | -2.214681 | -3.605376 | H | 2.884894  | -2.546014 | -3.309365 |
| H | 1.415708  | -0.434358 | -2.985544 | H | 1.121321  | -0.901791 | -2.88555  |
| H | 4.50265   | -2.422384 | 0.402881  | H | 4.82655   | -1.581219 | 0.396589  |
| H | 0.077132  | 0.811535  | -1.967447 | H | -0.278495 | 0.378936  | -2.012013 |
| H | 0.27399   | 0.046197  | 2.815225  | H | 0.501628  | 0.720402  | 2.762293  |
| H | 0.256031  | -1.122214 | 1.499575  | H | 0.581833  | -0.697289 | 1.722527  |
| H | -3.878203 | -1.112162 | 1.584578  | H | -3.483282 | -1.31925  | 2.318233  |
| H | 0.69869   | 3.082306  | -0.115745 | H | 0.100378  | 3.05692   | -0.729539 |
| H | -0.169334 | 5.189836  | -0.566659 | H | -1.166562 | 4.860825  | -1.452912 |
| H | -1.901704 | 5.16812   | -0.951445 | H | -2.897178 | 4.493299  | -1.59226  |
| H | -0.728146 | 5.362196  | -2.243399 | H | -1.910878 | 4.589188  | -3.042112 |
| H | -1.737479 | 1.76376   | -2.679049 | H | -2.305426 | 0.868384  | -2.6447   |
| H | -1.860881 | 3.391446  | -3.3745   | H | -2.780577 | 2.274671  | -3.617488 |
| H | -2.889822 | 2.933356  | -2.028315 | H | -3.576508 | 1.959856  | -2.085224 |
| H | -2.615069 | -2.845145 | -1.51448  | H | -2.835915 | -3.461978 | 1.423045  |
| H | -3.910041 | -3.379277 | 1.211661  | H | -0.065301 | -2.787984 | 0.313033  |
| H | -4.796478 | -3.119501 | -0.303976 | H | -0.596075 | -2.57542  | 1.998616  |
| H | -3.740621 | -4.524623 | -0.112344 | H | -0.475923 | -4.187901 | 1.303717  |
| H | -1.227979 | -4.212948 | 0.060992  | H | -2.223185 | -5.006894 | -0.352043 |
| H | -0.492149 | -2.645515 | -0.26336  | H | -3.472122 | -3.903153 | -0.945279 |
| H | -1.345869 | -2.935389 | 1.26992   | H | -1.789319 | -3.671036 | -1.434792 |
| H | 2.177227  | 3.111652  | 3.073478  | H | 1.834291  | 4.026332  | 2.144583  |
| H | 0.700587  | 2.15754   | 3.309839  | H | 0.579094  | 2.929233  | 2.750899  |
| H | 2.305018  | 1.385968  | 3.485197  | H | 2.305134  | 2.477397  | 2.881144  |

| 2S,5R,8R,10R-2E |           |           |           | 2S,5R,8R,10R-2F |           |           |           |
|-----------------|-----------|-----------|-----------|-----------------|-----------|-----------|-----------|
| C               | 3.238492  | -2.914398 | -1.565353 | C               | 2.801831  | -3.267321 | -1.785944 |
| C               | 2.479185  | -2.172554 | -2.480957 | C               | 2.109204  | -2.398788 | -2.640778 |
| C               | 1.791042  | -1.022876 | -2.120103 | C               | 1.592029  | -1.18495  | -2.210682 |
| C               | 1.874342  | -0.601265 | -0.791355 | C               | 1.785099  | -0.829763 | -0.874183 |
| C               | 2.607316  | -1.36289  | 0.135632  | C               | 2.447964  | -1.715635 | -0.00678  |
| C               | 3.304127  | -2.507422 | -0.244936 | C               | 2.973101  | -2.924676 | -0.456624 |
| N               | 1.332119  | 0.530728  | -0.208342 | N               | 1.418101  | 0.338506  | -0.22881  |
| C               | 1.425548  | 0.395941  | 1.254028  | C               | 1.541474  | 0.129999  | 1.221769  |
| C               | 2.464037  | -0.74114  | 1.438126  | C               | 2.435033  | -1.133616 | 1.322071  |
| C               | 0.168249  | 1.192932  | -0.772835 | C               | 0.330816  | 1.164945  | -0.717314 |
| N               | -1.034882 | 0.591102  | -0.196175 | N               | -0.928231 | 0.695796  | -0.128537 |
| C               | -1.079511 | 0.677036  | 1.251088  | C               | -0.925318 | 0.69908   | 1.322303  |
| C               | 0.099582  | -0.08915  | 1.849824  | C               | 0.18464   | -0.221    | 1.834759  |
| O               | 2.981894  | -1.00836  | 2.499862  | O               | 2.954332  | -1.506637 | 2.350501  |
| O               | 1.761964  | 1.582363  | 1.895371  | O               | 2.040835  | 1.235419  | 1.899603  |
| C               | -1.838705 | -0.18149  | -0.961155 | C               | -1.876699 | 0.15948   | -0.923424 |
| C               | -2.860662 | -1.021927 | -0.222747 | C               | -3.111193 | -0.420265 | -0.268066 |

|   |           |           |           |   |           |           |           |
|---|-----------|-----------|-----------|---|-----------|-----------|-----------|
| N | -3.238226 | -0.408641 | 1.037433  | N | -3.200917 | -0.149519 | 1.151563  |
| C | -2.398058 | 0.248768  | 1.857409  | C | -2.240127 | 0.31904   | 1.962855  |
| C | 0.217666  | 2.682507  | -0.561394 | C | 0.570385  | 2.624146  | -0.438297 |
| O | -1.73779  | -0.246436 | -2.178482 | O | -1.777849 | 0.110574  | -2.143034 |
| O | -2.659811 | 0.535449  | 3.013949  | O | -2.380593 | 0.448869  | 3.168949  |
| C | -0.446383 | 3.57066   | -1.306646 | C | 0.070704  | 3.625402  | -1.168773 |
| C | -0.336068 | 5.037932  | -1.022857 | C | 0.370474  | 5.049829  | -0.811725 |
| C | -1.347865 | 3.211283  | -2.447504 | C | -0.816604 | 3.44785   | -2.362382 |
| C | -2.343445 | -2.471519 | -0.034419 | C | -3.195676 | -1.926864 | -0.597085 |
| C | -1.998822 | -3.143615 | -1.3582   | C | -4.509083 | -2.518716 | -0.101531 |
| C | -3.372119 | -3.299035 | 0.729378  | C | -1.999538 | -2.700547 | -0.057959 |
| H | -0.978446 | 1.735469  | 1.515759  | H | -0.721813 | 1.723516  | 1.65405   |
| H | -3.747137 | -1.051607 | -0.861625 | H | -3.955183 | 0.074438  | -0.760968 |
| C | 3.032251  | 2.105824  | 1.529529  | C | 3.349864  | 1.623079  | 1.502488  |
| H | 3.758408  | -3.805242 | -1.894028 | H | 3.187159  | -4.204262 | -2.167565 |
| H | 2.424173  | -2.506114 | -3.511097 | H | 1.968668  | -2.682325 | -3.677771 |
| H | 1.210549  | -0.484566 | -2.857548 | H | 1.055517  | -0.548198 | -2.901502 |
| H | 3.866375  | -3.067015 | 0.493564  | H | 3.485887  | -3.581208 | 0.236667  |
| H | 0.130403  | 0.96392   | -1.835332 | H | 0.232705  | 0.996955  | -1.786711 |
| H | 0.14123   | 0.048003  | 2.930723  | H | 0.267     | -0.148372 | 2.919195  |
| H | -0.018451 | -1.156075 | 1.641294  | H | -0.066557 | -1.252985 | 1.57496   |
| H | -4.119159 | -0.682809 | 1.447927  | H | -4.073675 | -0.37117  | 1.609738  |
| H | 0.828638  | 3.032301  | 0.261558  | H | 1.182238  | 2.853947  | 0.42558   |
| H | 0.330819  | 5.242828  | -0.183909 | H | 1.020716  | 5.124497  | 0.061251  |
| H | -1.320998 | 5.460085  | -0.796043 | H | -0.555677 | 5.596612  | -0.604381 |
| H | 0.03724   | 5.571074  | -1.903875 | H | 0.853758  | 5.560773  | -1.651482 |
| H | -1.402074 | 2.140921  | -2.647445 | H | -1.024819 | 2.406479  | -2.608159 |
| H | -1.024328 | 3.724838  | -3.35905  | H | -0.373877 | 3.936582  | -3.236709 |
| H | -2.363936 | 3.563509  | -2.237869 | H | -1.776054 | 3.945267  | -2.18266  |
| H | -1.431754 | -2.41328  | 0.573303  | H | -3.181311 | -1.973731 | -1.690242 |
| H | -2.875739 | -3.1825   | -2.011926 | H | -4.548959 | -2.547446 | 0.992015  |
| H | -1.202987 | -2.623873 | -1.892223 | H | -5.369251 | -1.948215 | -0.463263 |
| H | -1.67335  | -4.169719 | -1.171109 | H | -4.614345 | -3.547184 | -0.454134 |
| H | -3.01211  | -4.323535 | 0.846632  | H | -2.084938 | -3.757545 | -0.319503 |
| H | -3.563854 | -2.903437 | 1.728999  | H | -1.054657 | -2.336628 | -0.473098 |
| H | -4.320354 | -3.337505 | 0.182907  | H | -1.951168 | -2.636162 | 1.033581  |
| H | 3.104554  | 3.089465  | 1.991413  | H | 3.561603  | 2.560675  | 2.014499  |
| H | 3.840792  | 1.470553  | 1.902756  | H | 4.088829  | 0.873494  | 1.800367  |
| H | 3.117171  | 2.206261  | 0.442925  | H | 3.401461  | 1.778664  | 0.420396  |

| 2 <i>S</i> ,5 <i>R</i> ,8 <i>R</i> ,10 <i>R</i> -2 <i>G</i> |           |           |          | 2 <i>S</i> ,5 <i>R</i> ,8 <i>R</i> ,10 <i>R</i> -2 <i>H</i> |           |           |          |
|-------------------------------------------------------------|-----------|-----------|----------|-------------------------------------------------------------|-----------|-----------|----------|
| C                                                           | -2.800303 | -3.268316 | 1.786175 | C                                                           | -3.061735 | -2.98085  | 1.731785 |
| C                                                           | -2.108091 | -2.399379 | 2.640935 | C                                                           | -2.142948 | -2.327865 | 2.564857 |
| C                                                           | -1.59146  | -1.185353 | 2.210714 | C                                                           | -1.480641 | -1.170145 | 2.181225 |
| C                                                           | -1.784648 | -0.830413 | 0.874169 | C                                                           | -1.758813 | -0.647408 | 0.916561 |

|   |           |           |           |   |           |           |           |
|---|-----------|-----------|-----------|---|-----------|-----------|-----------|
| C | -2.447094 | -1.716669 | 0.006848  | C | -2.652413 | -1.321171 | 0.065594  |
| C | -2.971707 | -2.925893 | 0.456815  | C | -3.319451 | -2.474841 | 0.4702    |
| N | -1.418167 | 0.337968  | 0.228687  | N | -1.274846 | 0.511224  | 0.334563  |
| C | -1.541454 | 0.129276  | -1.22186  | C | -1.585734 | 0.477376  | -1.102478 |
| C | -2.434459 | -1.134746 | -1.322053 | C | -2.687575 | -0.610063 | -1.198603 |
| C | -0.331191 | 1.164879  | 0.717105  | C | -0.018538 | 1.101654  | 0.755476  |
| N | 0.928016  | 0.696125  | 0.128373  | N | 1.071829  | 0.498694  | -0.018575 |
| C | 0.925146  | 0.699309  | -1.32247  | C | 0.917223  | 0.649277  | -1.452452 |
| C | -0.184494 | -0.221196 | -1.834872 | C | -0.381498 | -0.021407 | -1.903542 |
| O | -2.953623 | -1.50808  | -2.350435 | O | -3.373207 | -0.784308 | -2.181452 |
| O | -2.041323 | 1.234418  | -1.899806 | O | -1.958143 | 1.712224  | -1.619297 |
| C | 1.876791  | 0.160495  | 0.923342  | C | 2.028077  | -0.209582 | 0.618824  |
| C | 3.111449  | -0.418988 | 0.268057  | C | 3.068284  | -0.916181 | -0.223589 |
| N | 3.201011  | -0.148567 | -1.151643 | N | 3.058128  | -0.498113 | -1.611937 |
| C | 2.240082  | 0.319626  | -1.962968 | C | 2.07962   | 0.139575  | -2.272967 |
| C | -0.571338 | 2.62395   | 0.437944  | C | -0.039908 | 2.600353  | 0.629368  |
| O | 1.77805   | 0.11188   | 2.142975  | O | 2.074235  | -0.308295 | 1.838869  |
| O | 2.380487  | 0.449359  | -3.169086 | O | 2.095406  | 0.334093  | -3.478678 |
| C | -0.072528 | 3.62549   | 1.168627  | C | 0.625633  | 3.441035  | 1.427265  |
| C | -0.372925 | 5.049743  | 0.8114    | C | 0.525815  | 4.922122  | 1.218626  |
| C | 0.81431   | 3.448477  | 2.362668  | C | 1.511771  | 3.024581  | 2.561064  |
| C | 3.196396  | -1.925487 | 0.597406  | C | 2.94157   | -2.456048 | -0.112541 |
| C | 4.509945  | -2.51706  | 0.101907  | C | 1.560199  | -2.950419 | -0.520914 |
| C | 2.000451  | -2.699625 | 0.058495  | C | 3.339719  | -2.978907 | 1.26177   |
| H | 0.721315  | 1.723651  | -1.654301 | H | 0.856806  | 1.72187   | -1.671598 |
| H | 3.955309  | 0.076093  | 0.7608    | H | 4.031204  | -0.627457 | 0.20987   |
| C | -3.350437 | 1.62166   | -1.502599 | C | -3.126137 | 2.266359  | -1.027786 |
| H | -3.185217 | -4.20539  | 2.167887  | H | -3.553698 | -3.881994 | 2.075104  |
| H | -1.967458 | -2.682738 | 3.677962  | H | -1.937727 | -2.739917 | 3.546448  |
| H | -1.055273 | -0.548269 | 2.901482  | H | -0.772174 | -0.702841 | 2.852365  |
| H | -3.484186 | -3.582733 | -0.23641  | H | -4.008351 | -2.965474 | -0.207548 |
| H | -0.233011 | 0.997042  | 1.786518  | H | 0.162516  | 0.81417   | 1.78746   |
| H | -0.266924 | -0.148637 | -2.919307 | H | -0.563232 | 0.176157  | -2.959877 |
| H | 0.067124  | -1.253073 | -1.57505  | H | -0.288173 | -1.101408 | -1.763965 |
| H | 4.073824  | -0.370035 | -1.609803 | H | 3.818823  | -0.82713  | -2.190959 |
| H | -1.182914 | 2.853432  | -0.426217 | H | -0.639392 | 3.003954  | -0.178061 |
| H | -1.022734 | 5.124025  | -0.06193  | H | -0.13825  | 5.174834  | 0.390603  |
| H | 0.553021  | 5.597063  | 0.604559  | H | 1.514053  | 5.348643  | 1.01577   |
| H | -0.856968 | 5.560406  | 1.650891  | H | 0.154419  | 5.411435  | 2.125543  |
| H | 1.023235  | 2.407237  | 2.608403  | H | 1.613365  | 1.944855  | 2.66917   |
| H | 0.370743  | 3.936737  | 3.236831  | H | 1.139936  | 3.443761  | 3.502202  |
| H | 1.773457  | 3.946682  | 2.183512  | H | 2.514711  | 3.4394    | 2.413046  |
| H | 3.182102  | -1.972127 | 1.690574  | H | 3.668571  | -2.843154 | -0.837552 |
| H | 4.549784  | -2.546003 | -0.991635 | H | 0.788379  | -2.593389 | 0.169696  |
| H | 5.369969  | -1.946245 | 0.463488  | H | 1.301163  | -2.631192 | -1.53351  |

|   |           |           |           |   |           |           |           |
|---|-----------|-----------|-----------|---|-----------|-----------|-----------|
| H | 4.615511  | -3.545426 | 0.454717  | H | 1.532029  | -4.042166 | -0.507329 |
| H | 2.086162  | -3.756544 | 0.320261  | H | 3.376915  | -4.070969 | 1.241641  |
| H | 1.055479  | -2.335888 | 0.473587  | H | 4.326516  | -2.611549 | 1.556273  |
| H | 1.952026  | -2.635485 | -1.033057 | H | 2.62268   | -2.669839 | 2.023756  |
| H | -3.562909 | 2.558646  | -2.015421 | H | -3.233298 | 3.268761  | -1.439792 |
| H | -4.089088 | 0.871383  | -1.799524 | H | -4.011988 | 1.675701  | -1.279084 |
| H | -3.401773 | 1.778205  | -0.420634 | H | -3.023039 | 2.327904  | 0.059963  |

| 2S,5R,8R,10R-2I |           |           |           | 2S,5R,8R,10R-2J |           |           |           |
|-----------------|-----------|-----------|-----------|-----------------|-----------|-----------|-----------|
| C               | 3.852972  | -2.430442 | -1.656218 | C               | 3.061849  | -2.979634 | -1.730497 |
| C               | 2.969698  | -1.857506 | -2.58195  | C               | 2.141842  | -2.328297 | -2.563503 |
| C               | 2.081998  | -0.847175 | -2.239965 | C               | 1.479235  | -1.170453 | -2.180744 |
| C               | 2.087974  | -0.393738 | -0.919081 | C               | 1.758409  | -0.64586  | -0.917073 |
| C               | 2.951771  | -0.986901 | 0.01747   | C               | 2.653191  | -1.318017 | -0.066089 |
| C               | 3.845045  | -1.992135 | -0.343848 | C               | 3.320496  | -2.471833 | -0.469819 |
| N               | 1.35051   | 0.624795  | -0.351445 | N               | 1.274271  | 0.513244  | -0.336064 |
| C               | 1.49445   | 0.579858  | 1.099689  | C               | 1.586023  | 0.480928  | 1.100877  |
| C               | 2.695225  | -0.378551 | 1.310178  | C               | 2.688908  | -0.605427 | 1.197266  |
| C               | 0.112437  | 1.116149  | -0.922649 | C               | 0.017033  | 1.101953  | -0.756587 |
| N               | -1.01869  | 0.43538   | -0.282006 | N               | -1.072159 | 0.49783   | 0.01819   |
| C               | -1.026559 | 0.567401  | 1.162169  | C               | -0.91724  | 0.649746  | 1.451888  |
| C               | 0.250701  | -0.053419 | 1.730013  | C               | 0.382752  | -0.018468 | 1.903077  |
| O               | 3.247673  | -0.553399 | 2.375361  | O               | 3.375542  | -0.778001 | 2.179707  |
| O               | 1.766162  | 1.888083  | 1.531536  | O               | 1.957569  | 1.716528  | 1.616449  |
| C               | -1.782536 | -0.415826 | -0.99813  | C               | -2.027106 | -0.213017 | -0.618304 |
| C               | -2.888129 | -1.160282 | -0.278924 | C               | -3.065674 | -0.920901 | 0.225044  |
| N               | -3.064935 | -0.757852 | 1.100933  | N               | -3.05593  | -0.501548 | 1.613017  |
| C               | -2.237349 | -0.015136 | 1.851486  | C               | -2.078458 | 0.138631  | 2.273193  |
| C               | 0.004921  | 2.615817  | -0.803064 | C               | 0.036472  | 2.600738  | -0.630989 |
| O               | -1.632444 | -0.600064 | -2.199062 | O               | -2.073375 | -0.312934 | -1.838245 |
| O               | -2.416646 | 0.206973  | 3.038981  | O               | -2.094287 | 0.334206  | 3.478729  |
| C               | -0.870704 | 3.364512  | -1.479555 | C               | -0.632192 | 3.440073  | -1.427688 |
| C               | -0.908981 | 4.850857  | -1.291683 | C               | -0.534304 | 4.921393  | -1.219823 |
| C               | -1.879973 | 2.819157  | -2.442675 | C               | -1.520262 | 3.021703  | -2.559259 |
| C               | -2.667222 | -2.680069 | -0.434437 | C               | -2.936003 | -2.46061  | 0.115326  |
| C               | -3.850366 | -3.462612 | 0.121278  | C               | -1.553664 | -2.951991 | 0.524034  |
| C               | -1.356967 | -3.136285 | 0.193532  | C               | -3.333229 | -2.98545  | -1.258499 |
| H               | -1.042432 | 1.638622  | 1.395382  | H               | -0.858561 | 1.722613  | 1.670155  |
| H               | -3.801707 | -0.901068 | -0.825914 | H               | -4.029276 | -0.63444  | -0.208402 |
| C               | 1.728082  | 2.128122  | 2.932249  | C               | 3.124736  | 2.271245  | 1.023844  |
| H               | 4.527065  | -3.216923 | -1.970761 | H               | 3.553979  | -3.880956 | -2.073108 |
| H               | 2.976492  | -2.214664 | -3.605651 | H               | 1.935831  | -2.741804 | -3.544316 |
| H               | 1.415489  | -0.434143 | -2.985497 | H               | 0.76963   | -0.704591 | -2.851679 |
| H               | 4.502177  | -2.423259 | 0.402518  | H               | 4.010292  | -2.961208 | 0.207928  |
| H               | 0.077268  | 0.811902  | -1.967199 | H               | -0.164116 | 0.813923  | -1.788409 |

|   |           |           |           |   |           |           |           |
|---|-----------|-----------|-----------|---|-----------|-----------|-----------|
| H | 0.273913  | 0.045346  | 2.815275  | H | 0.564704  | 0.180594  | 2.959094  |
| H | 0.255789  | -1.122615 | 1.499228  | H | 0.290879  | -1.098771 | 1.764893  |
| H | -3.878501 | -1.111717 | 1.58438   | H | -3.815788 | -0.831563 | 2.192572  |
| H | 0.698873  | 3.082184  | -0.114717 | H | 0.637056  | 3.005528  | 0.175013  |
| H | -0.168292 | 5.19002   | -0.565839 | H | 0.130886  | 5.175463  | -0.39312  |
| H | -1.900546 | 5.168699  | -0.951162 | H | -1.522826 | 5.346467  | -1.015326 |
| H | -0.726556 | 5.362839  | -2.242715 | H | -0.165328 | 5.410918  | -2.127613 |
| H | -1.736581 | 1.764565  | -2.679192 | H | -1.619303 | 1.941753  | -2.667505 |
| H | -1.85826  | 3.392179  | -3.375116 | H | -1.152076 | 3.442196  | -3.501239 |
| H | -2.888646 | 2.935129  | -2.029692 | H | -2.523897 | 3.433816  | -2.408382 |
| H | -2.615638 | -2.844379 | -1.51498  | H | -3.662217 | -2.848487 | 0.840714  |
| H | -3.910739 | -3.378801 | 1.211042  | H | -0.782534 | -2.59395  | -0.166829 |
| H | -4.797136 | -3.118518 | -0.30453  | H | -1.29526  | -2.63155  | 1.536409  |
| H | -3.741564 | -4.523897 | -0.113217 | H | -1.523368 | -4.04369  | 0.511215  |
| H | -1.228846 | -4.212755 | 0.060234  | H | -3.368444 | -4.077558 | -1.23735  |
| H | -0.492704 | -2.645385 | -0.263748 | H | -4.320694 | -2.62016  | -1.553333 |
| H | -1.346532 | -2.935433 | 1.269433  | H | -2.61676  | -2.675798 | -2.020782 |
| H | 2.177177  | 3.110726  | 3.074283  | H | 3.231171  | 3.274103  | 1.434927  |
| H | 0.700481  | 2.156589  | 3.310181  | H | 4.011268  | 1.681631  | 1.275185  |
| H | 2.304869  | 1.38497   | 3.485756  | H | 3.021009  | 2.331745  | -0.063904 |

| 2S,5R,8R,10R-2K |           |           |           | 2S,5R,8R,10R-2L |           |           |           |
|-----------------|-----------|-----------|-----------|-----------------|-----------|-----------|-----------|
| C               | 3.236856  | -2.915615 | -1.565526 | C               | 3.979859  | -2.166904 | -1.501616 |
| C               | 2.477816  | -2.173402 | -2.48105  | C               | 2.922947  | -1.95935  | -2.398819 |
| C               | 1.79022   | -1.023419 | -2.120121 | C               | 1.920263  | -1.027875 | -2.168377 |
| C               | 1.873823  | -0.601875 | -0.791371 | C               | 1.988376  | -0.27393  | -0.994837 |
| C               | 2.606522  | -1.363855 | 0.135538  | C               | 3.029068  | -0.503204 | -0.078772 |
| C               | 3.302783  | -2.508696 | -0.245103 | C               | 4.034468  | -1.433238 | -0.329713 |
| N               | 1.332129  | 0.530325  | -0.208273 | N               | 1.155915  | 0.742217  | -0.570286 |
| C               | 1.425563  | 0.395414  | 1.254093  | C               | 1.442382  | 1.047018  | 0.82869   |
| C               | 2.463595  | -0.742094 | 1.438067  | C               | 2.806988  | 0.352564  | 1.072743  |
| C               | 0.168534  | 1.193044  | -0.772686 | C               | -0.200144 | 0.897842  | -1.058561 |
| N               | -1.034836 | 0.591581  | -0.196113 | N               | -1.119255 | 0.196936  | -0.154827 |
| C               | -1.079449 | 0.677375  | 1.25116   | C               | -1.018836 | 0.643064  | 1.220325  |
| C               | 0.099423  | -0.089175 | 1.849895  | C               | 0.398419  | 0.381461  | 1.731698  |
| O               | 2.981423  | -1.009565 | 2.499754  | O               | 3.487938  | 0.517605  | 2.062317  |
| O               | 1.762499  | 1.581659  | 1.895488  | O               | 1.517058  | 2.443262  | 0.94606   |
| C               | -1.838868 | -0.180704 | -0.961199 | C               | -1.796897 | -0.886346 | -0.592203 |
| C               | -2.860875 | -1.021131 | -0.222855 | C               | -2.67098  | -1.627102 | 0.399092  |
| N               | -3.238357 | -0.407906 | 1.037381  | N               | -2.808178 | -0.939598 | 1.668819  |
| C               | -2.39811  | 0.24934   | 1.85741   | C               | -2.038233 | 0.043781  | 2.159161  |
| C               | 0.218524  | 2.682574  | -0.561061 | C               | -0.564717 | 2.353109  | -1.216246 |
| O               | -1.738034 | -0.24543  | -2.178541 | O               | -1.746503 | -1.271701 | -1.753616 |
| O               | -2.659865 | 0.536031  | 3.013945  | O               | -2.131456 | 0.472785  | 3.299081  |
| C               | -0.444848 | 3.571133  | -1.306429 | C               | -1.623222 | 2.797576  | -1.899654 |

|   |           |           |           |   |           |           |           |
|---|-----------|-----------|-----------|---|-----------|-----------|-----------|
| C | -0.333925 | 5.038318  | -1.02241  | C | -1.906157 | 4.266307  | -1.994984 |
| C | -1.346089 | 3.212373  | -2.447667 | C | -2.610317 | 1.913594  | -2.59778  |
| C | -2.34363  | -2.470743 | -0.03468  | C | -2.196179 | -3.084708 | 0.615099  |
| C | -1.999478 | -3.142845 | -1.358582 | C | -0.749153 | -3.15416  | 1.084252  |
| C | -3.372    | -3.29827  | 0.729498  | C | -2.433192 | -3.965887 | -0.604786 |
| H | -0.978123 | 1.735754  | 1.515939  | H | -1.211609 | 1.72285   | 1.230699  |
| H | -3.747383 | -1.050735 | -0.861685 | H | -3.658592 | -1.664414 | -0.072992 |
| C | 3.032969  | 2.104636  | 1.529588  | C | 1.558255  | 2.980381  | 2.261516  |
| H | 3.756328  | -3.806694 | -1.894262 | H | 4.738721  | -2.905901 | -1.725052 |
| H | 2.422565  | -2.506918 | -3.511191 | H | 2.882535  | -2.547702 | -3.308615 |
| H | 1.209904  | -0.484838 | -2.857507 | H | 1.119252  | -0.903127 | -2.884917 |
| H | 3.86483   | -3.068563 | 0.493341  | H | 4.826508  | -1.580198 | 0.395415  |
| H | 0.130608  | 0.964173  | -1.835207 | H | -0.279539 | 0.378934  | -2.01201  |
| H | 0.141107  | 0.04799   | 2.930791  | H | 0.502675  | 0.721652  | 2.761876  |
| H | -0.018966 | -1.156068 | 1.641417  | H | 0.583151  | -0.696299 | 1.722518  |
| H | -4.119355 | -0.681944 | 1.44783   | H | -3.480927 | -1.320813 | 2.320198  |
| H | 0.829358  | 3.031981  | 0.262158  | H | 0.098812  | 3.057108  | -0.729674 |
| H | 0.332814  | 5.242781  | -0.183238 | H | -1.16879  | 4.860501  | -1.45299  |
| H | -1.318717 | 5.460914  | -0.795828 | H | -2.899331 | 4.492358  | -1.591629 |
| H | 0.039906  | 5.571394  | -1.903245 | H | -1.913641 | 4.588525  | -3.04188  |
| H | -1.400921 | 2.142056  | -2.647671 | H | -2.307011 | 0.867478  | -2.643606 |
| H | -1.021827 | 3.725753  | -3.359055 | H | -2.781592 | 2.273253  | -3.617423 |
| H | -2.362012 | 3.565264  | -2.238443 | H | -3.578195 | 1.959456  | -2.085314 |
| H | -1.431713 | -2.412516 | 0.572698  | H | -2.833242 | -3.463027 | 1.424433  |
| H | -2.876666 | -3.181868 | -2.011936 | H | -0.06375  | -2.788143 | 0.312132  |
| H | -1.203915 | -2.623023 | -1.892933 | H | -0.59322  | -2.575293 | 1.998097  |
| H | -1.673805 | -4.168902 | -1.171581 | H | -0.473132 | -4.18792  | 1.303519  |
| H | -3.011881 | -4.322741 | 0.84667   | H | -2.221241 | -5.00761  | -0.351188 |
| H | -3.563423 | -2.902624 | 1.729157  | H | -3.471064 | -3.904354 | -0.943457 |
| H | -4.320417 | -3.336831 | 0.183349  | H | -1.78871  | -3.671525 | -1.434188 |
| H | 3.105776  | 3.088131  | 1.991706  | H | 1.833717  | 4.02792   | 2.142722  |
| H | 3.841284  | 1.46892   | 1.902542  | H | 0.579149  | 2.930482  | 2.74972   |
| H | 3.117777  | 2.20531   | 0.442997  | H | 2.305413  | 2.479375  | 2.879563  |

| 2S,5R,8R,10R-2M |           |           |           | 2S,5R,8R,10R-2N |           |           |           |
|-----------------|-----------|-----------|-----------|-----------------|-----------|-----------|-----------|
| C               | -3.981357 | -2.165586 | 1.500614  | C               | -4.272546 | -1.629897 | 1.441795  |
| C               | -2.924589 | -1.958627 | 2.398128  | C               | -3.32369  | -1.287175 | 2.415171  |
| C               | -1.921423 | -1.027575 | 2.168075  | C               | -2.237012 | -0.468167 | 2.142643  |
| C               | -1.988878 | -0.273445 | 0.994615  | C               | -2.103383 | 0.027671  | 0.84377   |
| C               | -3.029443 | -0.502117 | 0.078248  | C               | -3.037302 | -0.338564 | -0.140666 |
| C               | -4.035324 | -1.431736 | 0.328798  | C               | -4.129325 | -1.151716 | 0.151329  |
| N               | -1.155849 | 0.742364  | 0.570412  | N               | -1.154412 | 0.894805  | 0.342457  |
| C               | -1.441878 | 1.047611  | -0.828539 | C               | -1.251748 | 0.930984  | -1.113848 |
| C               | -2.806679 | 0.353709  | -1.073086 | C               | -2.617286 | 0.253549  | -1.397488 |
| C               | 0.200152  | 0.897419  | 1.059055  | C               | 0.138209  | 1.098564  | 0.971669  |

|   |           |           |           |   |           |           |           |
|---|-----------|-----------|-----------|---|-----------|-----------|-----------|
| N | 1.119229  | 0.196471  | 0.155349  | N | 1.114762  | 0.215164  | 0.330967  |
| C | 1.01928   | 0.643055  | -1.219694 | C | 1.203     | 0.407413  | -1.103476 |
| C | -0.397915 | 0.381987  | -1.73149  | C | -0.144568 | 0.07361   | -1.741339 |
| O | -3.487264 | 0.519138  | -2.06285  | O | -3.156936 | 0.239087  | -2.483318 |
| O | -1.516074 | 2.443928  | -0.945555 | O | -1.225684 | 2.281282  | -1.496168 |
| C | 1.796261  | -0.887288 | 0.592501  | C | 1.608699  | -0.850196 | 1.002322  |
| C | 2.670402  | -1.627963 | -0.398807 | C | 2.365771  | -1.874965 | 0.180608  |
| N | 2.808249  | -0.940004 | -1.668216 | N | 2.938567  | -1.28094  | -1.013669 |
| C | 2.038815  | 0.043843  | -2.158421 | C | 2.345781  | -0.332772 | -1.761166 |
| C | 0.565128  | 2.35255   | 1.217181  | C | 0.555733  | 2.54691   | 0.92118   |
| O | 1.745341  | -1.273071 | 1.753748  | O | 1.44448   | -1.012897 | 2.203468  |
| O | 2.132591  | 0.473295  | -3.298127 | O | 2.699929  | -0.029556 | -2.888684 |
| C | 1.624343  | 2.796471  | 1.899839  | C | 1.568971  | 3.062607  | 1.62263   |
| C | 1.907686  | 4.265092  | 1.995616  | C | 1.916899  | 4.515625  | 1.506571  |
| C | 2.611884  | 1.911886  | 2.596572  | C | 2.440666  | 2.270796  | 2.548198  |
| C | 2.19519   | -3.085331 | -0.615532 | C | 1.466435  | -3.094968 | -0.147704 |
| C | 0.748294  | -3.154113 | -1.085185 | C | 0.934756  | -3.778388 | 1.106526  |
| C | 2.431515  | -3.967043 | 0.6041    | C | 2.232075  | -4.093513 | -1.010156 |
| H | 1.212325  | 1.722797  | -1.229653 | H | 1.420565  | 1.46869   | -1.271795 |
| H | 3.65785   | -1.665786 | 0.073578  | H | 3.189409  | -2.216664 | 0.813386  |
| C | -1.556854 | 2.981412  | -2.26087  | C | -1.091496 | 2.560183  | -2.883768 |
| H | -4.740612 | -2.904268 | 1.723751  | H | -5.103626 | -2.272682 | 1.702576  |
| H | -2.884687 | -2.547114 | 3.307859  | H | -3.438932 | -1.674801 | 3.421161  |
| H | -1.12056  | -0.903269 | 2.884858  | H | -1.527092 | -0.230678 | 2.923843  |
| H | -4.827243 | -1.578233 | -0.396556 | H | -4.834306 | -1.409015 | -0.6307   |
| H | 0.279152  | 0.378228  | 2.012394  | H | 0.070593  | 0.756435  | 2.0032    |
| H | -0.501848 | 0.722497  | -2.761596 | H | -0.112289 | 0.216783  | -2.821723 |
| H | -0.582966 | -0.69572  | -1.722644 | H | -0.380909 | -0.978695 | -1.55863  |
| H | 3.481198  | -1.321086 | -2.319465 | H | 3.708289  | -1.764145 | -1.454143 |
| H | -0.098713 | 3.056906  | 0.731557  | H | -0.027608 | 3.180324  | 0.264483  |
| H | 1.170075  | 4.859696  | 1.454403  | H | 1.261694  | 5.038056  | 0.807761  |
| H | 2.900626  | 4.491087  | 1.591652  | H | 2.952133  | 4.63598   | 1.168943  |
| H | 1.915993  | 4.586848  | 3.042648  | H | 1.848105  | 5.006136  | 2.483584  |
| H | 2.307717  | 0.866057  | 2.643284  | H | 2.08795   | 1.253607  | 2.719893  |
| H | 2.785211  | 2.271717  | 3.615802  | H | 2.522489  | 2.779777  | 3.51402   |
| H | 3.578923  | 1.956701  | 2.082429  | H | 3.456742  | 2.210007  | 2.141818  |
| H | 2.832386  | -3.463556 | -1.424805 | H | 0.614041  | -2.724052 | -0.730679 |
| H | 0.062774  | -2.788071 | -0.313181 | H | 1.76012   | -4.133202 | 1.731693  |
| H | 0.592886  | -2.574915 | -1.998909 | H | 0.31704   | -3.113854 | 1.710688  |
| H | 0.471966  | -4.187704 | -1.304861 | H | 0.332821  | -4.644535 | 0.821492  |
| H | 2.219226  | -5.008593 | 0.350071  | H | 1.604562  | -4.96337  | -1.216203 |
| H | 3.469321  | -3.90604  | 0.943071  | H | 2.529773  | -3.670101 | -1.971653 |
| H | 1.786922  | -3.672723 | 1.433431  | H | 3.130565  | -4.444114 | -0.491364 |
| H | -1.832104 | 4.028985  | -2.141866 | H | -1.321093 | 3.619625  | -2.994098 |
| H | -0.57765  | 2.931419  | -2.74887  | H | -0.068261 | 2.387003  | -3.233752 |

|   |           |          |           |   |           |          |           |
|---|-----------|----------|-----------|---|-----------|----------|-----------|
| H | -2.303992 | 2.480752 | -2.879224 | H | -1.791331 | 1.975408 | -3.483283 |
|---|-----------|----------|-----------|---|-----------|----------|-----------|

| 2S,5R,8R,10R-2O |           |           |           | 2S,5R,8R,10R-2P |           |           |           |
|-----------------|-----------|-----------|-----------|-----------------|-----------|-----------|-----------|
| C               | 2.798459  | -3.269702 | -1.787471 | C               | 4.271446  | -1.630605 | -1.442729 |
| C               | 2.107391  | -2.399475 | -2.641838 | C               | 3.322509  | -1.287285 | -2.415817 |
| C               | 1.591437  | -1.185437 | -2.210828 | C               | 2.236162  | -0.467993 | -2.142831 |
| C               | 1.784146  | -0.831829 | -0.873859 | C               | 2.102963  | 0.027512  | -0.843788 |
| C               | 2.445468  | -1.719354 | -0.006963 | C               | 3.036936  | -0.339342 | 0.140357  |
| C               | 2.969398  | -2.928577 | -0.457713 | C               | 4.128637  | -1.152767 | -0.152092 |
| N               | 1.418165  | 0.336212  | -0.227533 | N               | 1.154406  | 0.894893  | -0.342054 |
| C               | 1.54066   | 0.126262  | 1.22289   | C               | 1.251956  | 0.930448  | 1.114259  |
| C               | 2.432562  | -1.138596 | 1.322444  | C               | 2.617371  | 0.252568  | 1.397425  |
| C               | 0.332261  | 1.164597  | -0.715847 | C               | -0.138309 | 1.099054  | -0.970971 |
| N               | -0.927667 | 0.69693   | -0.127776 | N               | -1.114865 | 0.215477  | -0.330506 |
| C               | -0.925253 | 0.698838  | 1.323069  | C               | -1.202904 | 0.40715   | 1.104027  |
| C               | 0.183115  | -0.223408 | 1.835028  | C               | 0.144712  | 0.07303   | 1.741593  |
| O               | 2.950874  | -1.513253 | 2.350777  | O               | 3.157268  | 0.237688  | 2.483127  |
| O               | 2.041202  | 1.230451  | 1.901899  | O               | 1.226315  | 2.280574  | 1.497182  |
| C               | -1.877132 | 0.163712  | -0.923554 | C               | -1.609056 | -0.849493 | -1.002292 |
| C               | -3.112786 | -0.414643 | -0.269151 | C               | -2.366099 | -1.874552 | -0.180921 |
| N               | -3.202476 | -0.14511  | 1.150711  | N               | -2.938636 | -1.281004 | 1.013718  |
| C               | -2.2409   | 0.320353  | 1.962852  | C               | -2.345658 | -0.333237 | 1.761558  |
| C               | 0.574016  | 2.623197  | -0.435785 | C               | -0.555661 | 2.547413  | -0.919789 |
| O               | -1.778179 | 0.116252  | -2.143215 | O               | -1.445008 | -1.011665 | -2.203536 |
| O               | -2.381341 | 0.448822  | 3.169092  | O               | -2.69961  | -0.030497 | 2.889267  |
| C               | 0.078968  | 3.625796  | -1.167573 | C               | -1.567843 | 3.063882  | -1.6222   |
| C               | 0.380922  | 5.04941   | -0.809107 | C               | -1.915595 | 4.516893  | -1.50547  |
| C               | -0.804747 | 3.450784  | -2.364236 | C               | -2.438389 | 2.273117  | -2.549729 |
| C               | -3.199578 | -1.920801 | -0.599666 | C               | -1.466813 | -3.094788 | 0.146658  |
| C               | -4.513908 | -2.511147 | -0.104761 | C               | -0.936025 | -3.778021 | -1.108049 |
| C               | -2.00467  | -2.696855 | -0.061229 | C               | -2.232177 | -4.093321 | 1.009363  |
| H               | -0.720288 | 1.722638  | 1.655897  | H               | -1.420432 | 1.468363  | 1.272817  |
| H               | -3.955827 | 0.081916  | -0.761796 | H               | -3.189888 | -2.215907 | -0.81369  |
| C               | 3.350757  | 1.616965  | 1.505426  | C               | 1.091918  | 2.558801  | 2.884896  |
| H               | 3.182861  | -4.206733 | -2.169803 | H               | 5.102266  | -2.273582 | -1.703866 |
| H               | 1.967126  | -2.681792 | -3.679201 | H               | 3.437425  | -1.674659 | -3.421941 |
| H               | 1.05621   | -0.5473   | -2.901372 | H               | 1.526151  | -0.230066 | -2.923813 |
| H               | 3.481012  | -3.586403 | 0.235216  | H               | 4.833685  | -1.410535 | 0.629721  |
| H               | 0.234214  | 0.997423  | -1.78536  | H               | -0.070881 | 0.757376  | -2.002647 |
| H               | 0.265177  | -0.151965 | 2.919565  | H               | 0.112568  | 0.2159    | 2.822023  |
| H               | -0.069489 | -1.254763 | 1.574101  | H               | 0.380911  | -0.979252 | 1.558569  |
| H               | -4.075783 | -0.365652 | 1.608376  | H               | -3.708405 | -1.764284 | 1.454034  |
| H               | 1.183697  | 2.851417  | 0.430065  | H               | 0.026867  | 3.180195  | -0.261756 |
| H               | 1.029122  | 5.122269  | 0.065536  | H               | -1.261215 | 5.038619  | -0.805361 |
| H               | -0.544574 | 5.598083  | -0.603836 | H               | -2.95126  | 4.637241  | -1.169174 |

|   |           |           |           |   |           |           |           |
|---|-----------|-----------|-----------|---|-----------|-----------|-----------|
| H | 0.867404  | 5.559711  | -1.647408 | H | -1.845328 | 5.008154  | -2.482003 |
| H | -1.01684  | 2.410076  | -2.609484 | H | -2.086929 | 1.255284  | -2.720147 |
| H | -0.356481 | 3.936367  | -3.237512 | H | -2.51685  | 2.781901  | -3.515949 |
| H | -1.762524 | 3.952891  | -2.188757 | H | -3.455629 | 2.214212  | -2.146011 |
| H | -3.18522  | -1.966629 | -1.69287  | H | -0.613991 | -2.72417  | 0.729202  |
| H | -4.553861 | -2.540921 | 0.988754  | H | -1.761838 | -4.132638 | -1.73274  |
| H | -5.373198 | -1.938992 | -0.465956 | H | -0.318669 | -3.113406 | -1.712492 |
| H | -4.620706 | -3.539099 | -0.458408 | H | -0.333973 | -4.644277 | -0.823597 |
| H | -2.091792 | -3.753502 | -0.323621 | H | -1.604861 | -4.963509 | 1.214608  |
| H | -1.059228 | -2.334121 | -0.47611  | H | -2.52893  | -3.670091 | 1.97123   |
| H | -1.95616  | -2.63344  | 1.030361  | H | -3.131233 | -4.443375 | 0.491177  |
| H | 3.563638  | 2.553605  | 2.018708  | H | 1.322605  | 3.61793   | 2.99596   |
| H | 4.088752  | 0.866052  | 1.802374  | H | 0.068364  | 2.38649   | 3.234384  |
| H | 3.402658  | 1.773914  | 0.423548  | H | 1.790927  | 1.972931  | 3.484307  |

| 2 <i>S</i> ,5 <i>R</i> ,8 <i>R</i> ,10 <i>R</i> - <b>2Q</b> |           |           |           | 2 <i>S</i> ,5 <i>R</i> ,8 <i>R</i> ,10 <i>R</i> - <b>2R</b> |           |           |           |
|-------------------------------------------------------------|-----------|-----------|-----------|-------------------------------------------------------------|-----------|-----------|-----------|
| C                                                           | 2.803113  | -3.266492 | -1.785887 | C                                                           | -2.430036 | 3.95866   | -0.759712 |
| C                                                           | 2.110319  | -2.398136 | -2.640765 | C                                                           | -1.990145 | 3.211382  | -1.860828 |
| C                                                           | 1.592703  | -1.184483 | -2.210674 | C                                                           | -1.561691 | 1.896     | -1.747315 |
| C                                                           | 1.785485  | -0.829303 | -0.874131 | C                                                           | -1.584858 | 1.309501  | -0.479298 |
| C                                                           | 2.448527  | -1.715007 | -0.006691 | C                                                           | -1.993923 | 2.068419  | 0.632224  |
| C                                                           | 2.974108  | -2.923858 | -0.45653  | C                                                           | -2.430467 | 3.383561  | 0.49927   |
| N                                                           | 1.41803   | 0.338812  | -0.228747 | N                                                           | -1.277849 | 0.017505  | -0.116144 |
| C                                                           | 1.541357  | 0.130317  | 1.221835  | C                                                           | -1.180532 | -0.073522 | 1.333388  |
| C                                                           | 2.435264  | -1.133049 | 1.322183  | C                                                           | -1.843033 | 1.242289  | 1.817012  |
| C                                                           | 0.330571  | 1.164964  | -0.717332 | C                                                           | -0.491779 | -0.88396  | -0.935548 |
| N                                                           | -0.928402 | 0.695525  | -0.128613 | N                                                           | 0.896841  | -0.873023 | -0.477351 |
| C                                                           | -0.92555  | 0.69882   | 1.322227  | C                                                           | 1.067264  | -1.10905  | 0.945028  |
| C                                                           | 0.184574  | -0.221033 | 1.834723  | C                                                           | 0.296016  | -0.055183 | 1.738096  |
| O                                                           | 2.954547  | -1.505966 | 2.350659  | O                                                           | -2.126125 | 1.480642  | 2.971925  |
| O                                                           | 2.040382  | 1.235868  | 1.899712  | O                                                           | -1.870722 | -1.227168 | 1.725218  |
| C                                                           | -1.876689 | 0.158937  | -0.923532 | C                                                           | 1.86968   | -0.515874 | -1.345014 |
| C                                                           | -3.11113  | -0.420978 | -0.268223 | C                                                           | 3.285926  | -0.399893 | -0.824303 |
| N                                                           | -3.201002 | -0.150145 | 1.15138   | N                                                           | 3.457096  | -0.896928 | 0.524539  |
| C                                                           | -2.240324 | 0.318556  | 1.962724  | C                                                           | 2.500278  | -1.179506 | 1.420238  |
| C                                                           | 0.569765  | 2.624234  | -0.438329 | C                                                           | -1.027917 | -2.292696 | -0.976981 |
| O                                                           | -1.77774  | 0.109958  | -2.143133 | O                                                           | 1.65009   | -0.264283 | -2.52099  |
| O                                                           | -2.38087  | 0.448367  | 3.16881   | O                                                           | 2.728918  | -1.501145 | 2.576048  |
| C                                                           | 0.069747  | 3.625354  | -1.168759 | C                                                           | -2.134648 | -2.662002 | -1.623491 |
| C                                                           | 0.36914   | 5.049865  | -0.811737 | C                                                           | -2.581203 | -4.092196 | -1.633308 |
| C                                                           | -0.817597 | 3.447534  | -2.362301 | C                                                           | -3.032321 | -1.709685 | -2.351761 |
| C                                                           | -3.195347 | -1.927612 | -0.597145 | C                                                           | 3.762641  | 1.060725  | -0.983984 |
| C                                                           | -4.508659 | -2.519659 | -0.10157  | C                                                           | 5.241298  | 1.190495  | -0.640942 |
| C                                                           | -1.999073 | -2.701037 | -0.057956 | C                                                           | 2.916358  | 2.029798  | -0.168836 |
| H                                                           | -0.722252 | 1.7233    | 1.653968  | H                                                           | 0.646324  | -2.093922 | 1.180701  |

|   |           |           |           |   |           |           |           |
|---|-----------|-----------|-----------|---|-----------|-----------|-----------|
| H | -3.955166 | 0.073557  | -0.761217 | H | 3.88909   | -1.022238 | -1.493901 |
| C | 3.349356  | 1.623849  | 1.502724  | C | -1.738452 | -1.623073 | 3.084201  |
| H | 3.188786  | -4.203292 | -2.167506 | H | -2.754194 | 4.982147  | -0.898344 |
| H | 1.970007  | -2.681661 | -3.677792 | H | -1.980198 | 3.67474   | -2.840983 |
| H | 1.056098  | -0.547859 | -2.90154  | H | -1.220603 | 1.360425  | -2.623826 |
| H | 3.487023  | -3.580256 | 0.236793  | H | -2.745796 | 3.937992  | 1.375648  |
| H | 0.232557  | 0.99692   | -1.786731 | H | -0.460983 | -0.475594 | -1.945063 |
| H | 0.266849  | -0.148442 | 2.919169  | H | 0.411291  | -0.228711 | 2.808018  |
| H | -0.066365 | -1.253062 | 1.574846  | H | 0.704746  | 0.934993  | 1.51641   |
| H | -4.073761 | -0.371901 | 1.609503  | H | 4.403123  | -0.984841 | 0.868176  |
| H | 1.181652  | 2.854196  | 0.425481  | H | -0.43982  | -3.047722 | -0.464692 |
| H | 1.019564  | 5.124717  | 0.061086  | H | -1.896164 | -4.73725  | -1.080714 |
| H | -0.557142 | 5.596335  | -0.604152 | H | -2.658965 | -4.464825 | -2.660411 |
| H | 0.852051  | 5.560998  | -1.651594 | H | -3.578589 | -4.185543 | -1.189765 |
| H | -1.025743 | 2.406105  | -2.607894 | H | -2.641219 | -0.694119 | -2.40569  |
| H | -0.374906 | 3.936124  | -3.236728 | H | -4.006685 | -1.661408 | -1.853358 |
| H | -1.777066 | 3.944943  | -2.182664 | H | -3.217435 | -2.064116 | -3.370767 |
| H | -3.180959 | -1.974549 | -1.690299 | H | 3.629511  | 1.283381  | -2.047031 |
| H | -4.548544 | -2.548328 | 0.991976  | H | 5.42159   | 1.030636  | 0.42692   |
| H | -5.36892  | -1.949327 | -0.46335  | H | 5.849065  | 0.476817  | -1.204293 |
| H | -4.613739 | -3.548166 | -0.454112 | H | 5.594995  | 2.196104  | -0.879244 |
| H | -2.084309 | -3.758084 | -0.319353 | H | 3.270983  | 3.052926  | -0.311466 |
| H | -1.054269 | -2.337018 | -0.473183 | H | 1.863908  | 2.00374   | -0.466052 |
| H | -1.950671 | -2.636498 | 1.033573  | H | 2.982945  | 1.805448  | 0.900345  |
| H | 3.560799  | 2.561523  | 2.014712  | H | -2.490256 | -2.396395 | 3.239658  |
| H | 4.08848   | 0.874468  | 1.80072   | H | -0.751139 | -2.051727 | 3.287968  |
| H | 3.401035  | 1.779395  | 0.42063   | H | -1.926178 | -0.793309 | 3.768025  |

| 2S,5R,8R,10R-2S |           |           |           | 2S,5R,8R,10R-2T |           |           |           |
|-----------------|-----------|-----------|-----------|-----------------|-----------|-----------|-----------|
| C               | 4.269114  | -1.635155 | -1.443896 | C               | 3.980853  | -2.167156 | -1.501544 |
| C               | 3.320547  | -1.289992 | -2.416692 | C               | 2.924536  | -1.958683 | -2.399247 |
| C               | 2.235265  | -0.469492 | -2.143102 | C               | 1.921781  | -1.027342 | -2.1686   |
| C               | 2.102776  | 0.025325  | -0.843723 | C               | 1.98918   | -0.27449  | -0.994311 |
| C               | 3.036387  | -0.343301 | 0.140095  | C               | 3.029306  | -0.50464  | -0.077815 |
| C               | 4.127025  | -1.157936 | -0.152951 | C               | 4.034783  | -1.434542 | -0.328956 |
| N               | 1.155313  | 0.893532  | -0.341352 | N               | 1.156532  | 0.741271  | -0.569352 |
| C               | 1.253091  | 0.928119  | 1.114976  | C               | 1.442465  | 1.045354  | 0.829843  |
| C               | 2.61768   | 0.248331  | 1.397583  | C               | 2.806659  | 0.350206  | 1.074262  |
| C               | -0.137198 | 1.099646  | -0.970031 | C               | -0.199157 | 0.897799  | -1.058377 |
| N               | -1.114853 | 0.21701   | -0.329876 | N               | -1.119182 | 0.19739   | -0.155202 |
| C               | -1.202447 | 0.407982  | 1.104777  | C               | -1.019101 | 0.643151  | 1.220094  |
| C               | 0.144833  | 0.071747  | 1.741949  | C               | 0.39766   | 0.38018   | 1.732113  |
| O               | 3.157651  | 0.232048  | 2.483224  | O               | 3.486975  | 0.514178  | 2.064457  |
| O               | 1.229146  | 2.278058  | 1.498648  | O               | 1.517753  | 2.441561  | 0.947753  |
| C               | -1.610712 | -0.846814 | -1.002227 | C               | -1.797438 | -0.885293 | -0.593096 |

|   |           |           |           |   |           |           |           |
|---|-----------|-----------|-----------|---|-----------|-----------|-----------|
| C | -2.368941 | -1.871402 | -0.181367 | C | -2.672667 | -1.625475 | 0.397626  |
| N | -2.940372 | -1.277913 | 1.013826  | N | -2.810149 | -0.937935 | 1.667301  |
| C | -2.345958 | -0.331398 | 1.762122  | C | -2.039604 | 0.044678  | 2.158245  |
| C | -0.552678 | 2.548504  | -0.918174 | C | -0.562692 | 2.353321  | -1.216113 |
| O | -1.44719  | -1.00845  | -2.203616 | O | -1.746718 | -1.270526 | -1.754535 |
| O | -2.699176 | -0.028987 | 2.890146  | O | -2.133139 | 0.473637  | 3.298155  |
| C | -1.563078 | 3.06698   | -1.621672 | C | -1.620638 | 2.798586  | -1.899867 |
| C | -1.90892  | 4.520396  | -1.504274 | C | -1.902464 | 4.267528  | -1.995253 |
| C | -2.433322 | 2.278288  | -2.551237 | C | -2.60813  | 1.915327  | -2.598347 |
| C | -1.471247 | -3.093095 | 0.145168  | C | -2.199078 | -3.083451 | 0.613855  |
| C | -0.941143 | -3.775828 | -1.110104 | C | -0.752488 | -3.153981 | 1.08418   |
| C | -2.23801  | -4.091451 | 1.006835  | C | -2.435736 | -3.964324 | -0.60632  |
| H | -1.418618 | 1.469363  | 1.274235  | H | -1.210874 | 1.723116  | 1.230569  |
| H | -3.193339 | -2.211204 | -0.814186 | H | -3.660013 | -1.662037 | -0.075066 |
| C | 1.095753  | 2.55578   | 2.88657   | C | 1.559042  | 2.978159  | 2.263417  |
| H | 5.099083  | -2.279037 | -1.705507 | H | 4.7398    | -2.906005 | -1.725176 |
| H | 3.434902  | -1.676855 | -3.423078 | H | 2.884686  | -2.546176 | -3.309623 |
| H | 1.525539  | -0.230118 | -2.923899 | H | 1.121324  | -0.901775 | -2.885619 |
| H | 4.831811  | -1.417075 | 0.628646  | H | 4.826368  | -1.582193 | 0.396529  |
| H | -0.070342 | 0.758332  | -2.001854 | H | -0.278362 | 0.378977  | -2.011895 |
| H | 0.113028  | 0.214031  | 2.822464  | H | 0.5017    | 0.719943  | 2.762456  |
| H | 0.379604  | -0.980744 | 1.558279  | H | 0.581557  | -0.697717 | 1.722607  |
| H | -3.710464 | -1.760654 | 1.454168  | H | -3.483695 | -1.31858  | 2.318191  |
| H | 0.029736  | 3.179926  | -0.258727 | H | 0.101164  | 3.056823  | -0.729264 |
| H | -1.254657 | 5.040668  | -0.802975 | H | -1.165047 | 4.861151  | -1.4527   |
| H | -2.944825 | 4.641966  | -1.169165 | H | -2.895758 | 4.494254  | -1.592579 |
| H | -1.836752 | 5.012289  | -2.480352 | H | -1.908981 | 4.589833  | -3.04213  |
| H | -2.084078 | 1.259527  | -2.720644 | H | -2.305191 | 0.869127  | -2.644729 |
| H | -2.508127 | 2.787151  | -3.517714 | H | -2.779399 | 2.275556  | -3.617786 |
| H | -3.451696 | 2.222084  | -2.150007 | H | -3.575928 | 1.961254  | -2.085734 |
| H | -0.618029 | -2.724103 | 0.728165  | H | -2.837063 | -3.461405 | 1.422633  |
| H | -1.767291 | -4.128528 | -1.73543  | H | -0.066215 | -2.788172 | 0.312735  |
| H | -0.322583 | -3.111519 | -1.713655 | H | -0.596932 | -2.575486 | 1.998324  |
| H | -0.340482 | -4.643288 | -0.826379 | H | -0.477313 | -4.187982 | 1.303372  |
| H | -1.611795 | -4.96258  | 1.211459  | H | -2.224685 | -5.00622  | -0.352682 |
| H | -2.534455 | -3.668736 | 1.969026  | H | -3.473307 | -3.902049 | -0.945778 |
| H | -3.137374 | -4.439955 | 0.488146  | H | -1.79042  | -3.670297 | -1.435192 |
| H | 1.327289  | 3.61469   | 2.997933  | H | 1.835409  | 4.025515  | 2.145103  |
| H | 0.072278  | 2.384083  | 3.236583  | H | 0.579757  | 2.928881  | 2.751334  |
| H | 1.794666  | 1.96913   | 3.485324  | H | 2.305607  | 2.47631   | 2.881495  |

| 2S,5R,8R,10R-2U |          |           |           |
|-----------------|----------|-----------|-----------|
| C               | 3.980934 | -2.166813 | -1.501401 |
| C               | 2.924529 | -1.958628 | -2.399063 |
| C               | 1.921699 | -1.027341 | -2.168522 |

|   |           |           |           |
|---|-----------|-----------|-----------|
| C | 1.989106  | -0.274254 | -0.994385 |
| C | 3.02933   | -0.504109 | -0.077922 |
| C | 4.034881  | -1.433957 | -0.328963 |
| N | 1.156367  | 0.741497  | -0.56957  |
| C | 1.442349  | 1.045854  | 0.829561  |
| C | 2.806655  | 0.350929  | 1.07401   |
| C | -0.199389 | 0.897718  | -1.058488 |
| N | -1.119207 | 0.197176  | -0.155203 |
| C | -1.019156 | 0.64307   | 1.22005   |
| C | 0.39773   | 0.380618  | 1.731991  |
| O | 3.487004  | 0.515201  | 2.064132  |
| O | 1.517546  | 2.44209   | 0.947204  |
| C | -1.797252 | -0.885686 | -0.592997 |
| C | -2.672218 | -1.626026 | 0.397833  |
| N | -2.809849 | -0.93838  | 1.667439  |
| C | -2.039364 | 0.044303  | 2.158342  |
| C | -0.563252 | 2.353153  | -1.216263 |
| O | -1.746534 | -1.270961 | -1.75442  |
| O | -2.132781 | 0.473163  | 3.298298  |
| C | -1.621472 | 2.798155  | -1.899762 |
| C | -1.90365  | 4.26703   | -1.995132 |
| C | -2.608972 | 1.914656  | -2.597944 |
| C | -2.198198 | -3.083839 | 0.614167  |
| C | -0.751552 | -3.153934 | 1.084391  |
| C | -2.434679 | -3.964879 | -0.605924 |
| H | -1.211327 | 1.722966  | 1.23047   |
| H | -3.659575 | -1.662916 | -0.074809 |
| C | 1.558516  | 2.979     | 2.262741  |
| H | 4.739941  | -2.905629 | -1.724938 |
| H | 2.884663  | -2.546304 | -3.309321 |
| H | 1.121168  | -0.902003 | -2.885496 |
| H | 4.826545  | -1.581383 | 0.396482  |
| H | -0.278564 | 0.378839  | -2.011977 |
| H | 0.501739  | 0.720532  | 2.762285  |
| H | 0.581924  | -0.697231 | 1.722635  |
| H | -3.483138 | -1.319261 | 2.318458  |
| H | 0.100619  | 3.056824  | -0.729677 |
| H | -1.166106 | 4.860853  | -1.452974 |
| H | -2.896798 | 4.493561  | -1.591981 |
| H | -1.91076  | 4.589265  | -3.042026 |
| H | -2.305723 | 0.868556  | -2.644552 |
| H | -2.780715 | 2.274932  | -3.617287 |
| H | -3.576594 | 1.960231  | -2.084973 |
| H | -2.836027 | -3.461911 | 1.423013  |
| H | -0.065431 | -2.7881   | 0.312823  |

|   |           |           |           |
|---|-----------|-----------|-----------|
| H | -0.596049 | -2.575247 | 1.998424  |
| H | -0.476118 | -4.187832 | 1.303739  |
| H | -2.223291 | -5.00669  | -0.352219 |
| H | -3.472292 | -3.902943 | -0.945313 |
| H | -1.789513 | -3.67072  | -1.434868 |
| H | 1.834207  | 4.026505  | 2.144169  |
| H | 0.579284  | 2.929236  | 2.750709  |
| H | 2.305412  | 2.477759  | 2.88092   |

Key transitions, oscillator strengths, and rotatory strengths in the ECD of conformers *2S,5R,8R,10R-2Q* with cam-b3lyp function applying def2tzvpp basis set in methanol solvent.

| Species                | Excited State | $\Delta E(eV)^a$ | $\lambda(nm)^b$ | $f^c$  | $R_{vel}^d$ |
|------------------------|---------------|------------------|-----------------|--------|-------------|
| <i>2S,5R,8R,10R-2Q</i> | 104 -> 107    | 3.6897           | 336.03          | 0.0783 | -81.0027    |
|                        | 98 -> 107     | 3.9232           | 316.03          | 0.0088 | 67.2601     |
|                        | 102 -> 107    | 5.1335           | 241.52          | 0.0394 | -11.7459    |
|                        | 98 -> 107     | 5.6173           | 220.72          | 0.0592 | 8.0938      |
|                        | 102 -> 107    | 5.6603           | 219.04          | 0.664  | 48.7233     |
|                        | 99 -> 108     | 5.8675           | 211.31          | 0.0009 | -7.4216     |
|                        | 99 -> 109     | 5.902            | 210.07          | 0.001  | -10.2424    |
|                        | 97 -> 107     | 6.0048           | 206.47          | 0.0019 | 10.6335     |
|                        | 97 -> 107     | 6.1387           | 201.97          | 0.001  | -3.3008     |
|                        | 97 -> 107     | 6.2133           | 199.55          | 0.0068 | 10.5978     |
|                        | 105 -> 109    | 6.2913           | 197.07          | 0.1044 | 61.8223     |
|                        | 98 -> 107     | 6.4549           | 192.08          | 0.0034 | 3.3763      |
|                        | 97 -> 107     | 6.6671           | 185.96          | 0.0552 | 3.7931      |
|                        | 101 -> 109    | 6.6759           | 185.72          | 0.3209 | 34.3924     |
|                        | 104 -> 108    | 6.736            | 184.06          | 0.0458 | -41.8299    |
|                        | 91 -> 107     | 6.8092           | 182.08          | 0.0249 | 2.1246      |
|                        | 97 -> 107     | 6.8118           | 182.01          | 0.0955 | -9.9517     |
|                        | 97 -> 107     | 6.9145           | 179.31          | 0.0762 | -5.9539     |
|                        | 90 -> 107     | 6.9738           | 177.79          | 0.1206 | 127.549     |
|                        | 100 -> 109    | 7.0248           | 176.49          | 0.0241 | -20.0374    |
|                        | 99 -> 109     | 7.0841           | 175.02          | 0.0706 | 56.7961     |
|                        | 97 -> 107     | 7.1072           | 174.45          | 0.0427 | 17.8326     |
|                        | 90 -> 107     | 7.1267           | 173.97          | 0.0644 | 22.5748     |
|                        | 99 -> 109     | 7.1759           | 172.78          | 0.0502 | -127.5026   |
|                        | 100 -> 109    | 7.2286           | 171.52          | 0.2363 | 19.9014     |
|                        | 100 -> 108    | 7.3394           | 168.93          | 0.0126 | 9.1669      |
|                        | 102 -> 110    | 7.3705           | 168.22          | 0.0067 | -4.7516     |
|                        | 86 -> 107     | 7.3909           | 167.75          | 0.0096 | 6.4454      |
|                        | 99 -> 109     | 7.4584           | 166.24          | 0.135  | -101.5766   |
|                        | 86 -> 107     | 7.5456           | 164.31          | 0.0119 | -2.8817     |
|                        | 86 -> 107     | 7.5482           | 164.26          | 0.0977 | -82.8472    |
|                        | 86 -> 107     | 7.5837           | 163.49          | 0.0997 | 7.6977      |

|  |            |        |        |        |          |
|--|------------|--------|--------|--------|----------|
|  | 99 -> 110  | 7.6178 | 162.76 | 0.0478 | 20.9224  |
|  | 101 -> 108 | 7.7136 | 160.73 | 0.0286 | -20.6678 |
|  | 98 -> 109  | 7.7517 | 159.94 | 0.0024 | -0.9398  |
|  | 101 -> 108 | 7.8042 | 158.87 | 0.0005 | 3.6099   |
|  | 86 -> 107  | 7.8198 | 158.55 | 0.0077 | 33.7572  |
|  | 86 -> 107  | 7.8265 | 158.42 | 0.0306 | 8.1684   |
|  | 101 -> 110 | 7.8817 | 157.31 | 0.0012 | 0.0803   |
|  | 99 -> 109  | 7.9184 | 156.58 | 0.04   | -47.9497 |
|  | 101 -> 110 | 7.9406 | 156.14 | 0.0101 | -10.5431 |
|  | 99 -> 109  | 8.0104 | 154.78 | 0.0275 | 37.3779  |
|  | 97 -> 108  | 8.0233 | 154.53 | 0.0469 | -34.4391 |
|  | 99 -> 108  | 8.0371 | 154.27 | 0.0245 | -13.4474 |
|  | 99 -> 108  | 8.1312 | 152.48 | 0.0224 | -19.9433 |
|  | 81 -> 107  | 8.151  | 152.11 | 0.0076 | 5.0395   |
|  | 81 -> 107  | 8.1595 | 151.95 | 0.0055 | -11.3085 |
|  | 95 -> 109  | 8.2074 | 151.06 | 0.0137 | -33.67   |
|  | 100 -> 109 | 8.2176 | 150.88 | 0.0041 | -1.2146  |
|  | 99 -> 109  | 8.246  | 150.36 | 0.0063 | -22.8385 |

<sup>a</sup>Excitation energy. <sup>b</sup>Wavelength. <sup>c</sup>Oscillator strength. <sup>d</sup>Rotatory strength in velocity form ( $10^{-40}$ cgs.).

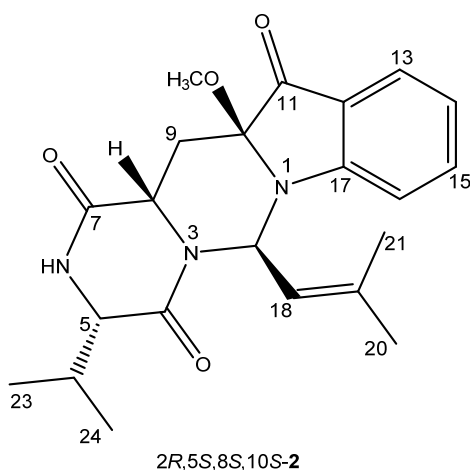

Optimized geometries of predominant conformers for compound 2R,5S,8S,10S-2 with PBE0 function applying 6-311G(d,p) basis set for C, N, and O atoms and 6-31G(d,p) basis set for H atoms in methanol solvent.

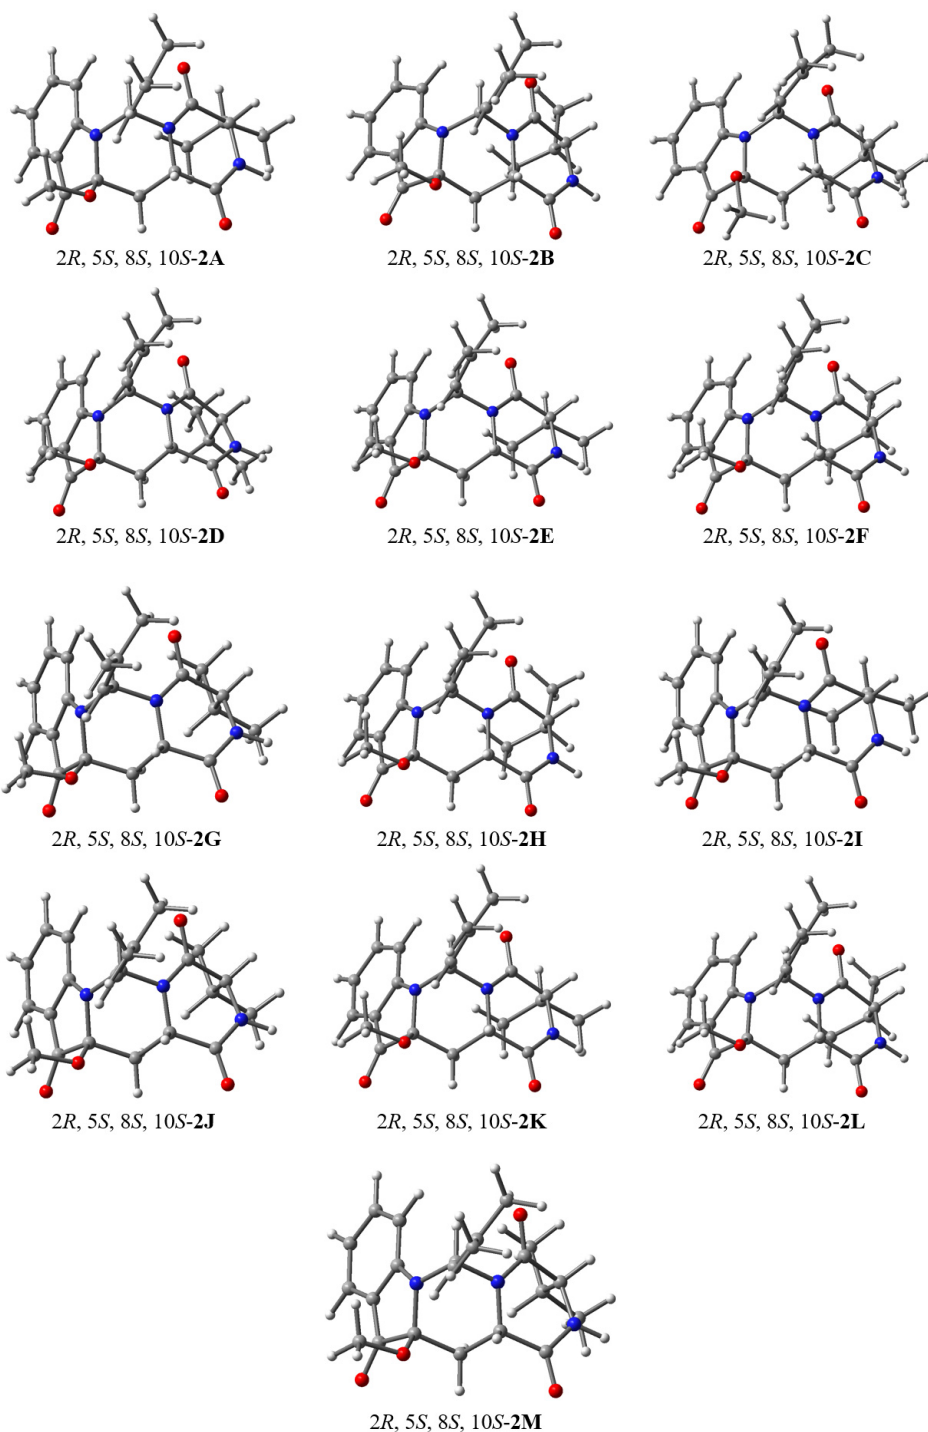

Important thermodynamic parameters (a.u.) and Boltzmann distributions of the optimized compound 2R,5S,8S,10S-2 with PBE0 function applying 6-311G(d,p) basis set for C, N, and O atoms and 6-31G(d,p) basis set for H atoms in methanol solvent.

| Conformations   | E+ZPE        | G            | %     |
|-----------------|--------------|--------------|-------|
| 2R,5S,8S,10S-2A | -1318.202184 | -1318.259972 | 16.80 |
| 2R,5S,8S,10S-2B | -1318.200720 | -1318.259145 | 7.00  |
| 2R,5S,8S,10S-2C | -1318.196430 | -1318.254262 | 0.04  |
| 2R,5S,8S,10S-2D | -1318.199226 | -1318.257297 | 0.99  |
| 2R,5S,8S,10S-2E | -1318.202184 | -1318.259974 | 16.84 |
| 2R,5S,8S,10S-2F | -1318.200721 | -1318.259151 | 7.04  |

|                 |              |              |       |
|-----------------|--------------|--------------|-------|
| 2R,5S,8S,10S-2G | -1318.199223 | -1318.257275 | 0.97  |
| 2R,5S,8S,10S-2H | -1318.200722 | -1318.259145 | 7.00  |
| 2R,5S,8S,10S-2I | -1318.202186 | -1318.259988 | 17.09 |
| 2R,5S,8S,10S-2J | -1318.199227 | -1318.257296 | 0.99  |
| 2R,5S,8S,10S-2K | -1318.202187 | -1318.259992 | 17.16 |
| 2R,5S,8S,10S-2L | -1318.200724 | -1318.259151 | 7.04  |
| 2R,5S,8S,10S-2M | -1318.199236 | -1318.257346 | 1.04  |

E+ZPE, G: total energy with zero-point energy (ZPE) and Gibbs free energy in methanol solution. %: Boltzmann distributions, using the relative Gibbs free energies as weighting factors.

Optimized Z-matrixes (Å) of compound 2R,5S,8S,10S-2 with PBE0 function applying 6-311G(d,p) basis set for C, N, and O atoms and 6-31G(d,p) basis set for H atoms in methanol solvent.

| 2R,5S,8S,10S-2A |           |           |           | 2R,5S,8S,10S-2B |           |           |           |
|-----------------|-----------|-----------|-----------|-----------------|-----------|-----------|-----------|
| C               | 2.799403  | -3.269062 | 1.786489  | C               | 3.063265  | -2.978681 | 1.730086  |
| C               | 2.10766   | -2.399647 | 2.64114   | C               | 2.143202  | -2.327673 | 2.563292  |
| C               | 1.591337  | -1.185572 | 2.210683  | C               | 1.48014   | -1.170041 | 2.180686  |
| C               | 1.784376  | -0.831073 | 0.873997  | C               | 1.758883  | -0.645342 | 0.916966  |
| C               | 2.446339  | -1.717809 | 0.006789  | C               | 2.653722  | -1.31717  | 0.065786  |
| C               | 2.97063   | -2.927084 | 0.456992  | C               | 3.321498  | -2.470769 | 0.469369  |
| N               | 1.418154  | 0.337227  | 0.228242  | N               | 1.274254  | 0.513631  | 0.336105  |
| C               | 1.541077  | 0.128091  | -1.222268 | C               | 1.585828  | 0.481561  | -1.100864 |
| C               | 2.433581  | -1.136291 | -1.322287 | C               | 2.689004  | -0.60448  | -1.197526 |
| C               | 0.331706  | 1.164802  | 0.716688  | C               | 0.016859  | 1.101862  | 0.756852  |
| N               | -0.927869 | 0.696657  | 0.128235  | N               | -1.072215 | 0.497509  | -0.017899 |
| C               | -0.925169 | 0.699351  | -1.322608 | C               | -0.917497 | 0.649807  | -1.45158  |
| C               | 0.183836  | -0.221967 | -1.834885 | C               | 0.382602  | -0.018014 | -1.903034 |
| O               | 2.952356  | -1.510129 | -2.350683 | O               | 3.375529  | -0.776774 | -2.180092 |
| O               | 2.041226  | 1.232865  | -1.900598 | O               | 1.956998  | 1.717331  | -1.616321 |
| C               | -1.876745 | 0.161598  | 0.923487  | C               | -2.026657 | -0.214081 | 0.618519  |
| C               | -3.111831 | -0.417348 | 0.268539  | C               | -3.065283 | -0.921829 | -0.224874 |
| N               | -3.201529 | -0.147069 | -1.151179 | N               | -3.055878 | -0.502018 | -1.612708 |
| C               | -2.240466 | 0.320369  | -1.962794 | C               | -2.078718 | 0.138667  | -2.272854 |
| C               | 0.572616  | 2.623687  | 0.437256  | C               | 0.035802  | 2.600675  | 0.631457  |
| O               | -1.777806 | 0.11317   | 2.143109  | O               | -2.072519 | -0.314629 | 1.838428  |
| O               | -2.381047 | 0.449976  | -3.168898 | O               | -2.094836 | 0.334653  | -3.47832  |
| C               | 0.07523   | 3.625619  | 1.168369  | C               | -0.63359  | 3.439615  | 1.42796   |
| C               | 0.376348  | 5.049637  | 0.810804  | C               | -0.536227 | 4.921007  | 1.220373  |
| C               | -0.810561 | 3.449345  | 2.363299  | C               | -1.521993 | 3.020665  | 2.559054  |
| C               | -3.197554 | -1.923747 | 0.598164  | C               | -2.935445 | -2.461565 | -0.115696 |
| C               | -4.51149  | -2.514696 | 0.102931  | C               | -1.553092 | -2.952675 | -0.524672 |
| C               | -2.002118 | -2.698665 | 0.059255  | C               | -3.332513 | -2.986883 | 1.25799   |
| H               | -0.720727 | 1.723452  | -1.654809 | H               | -0.859063 | 1.722742  | -1.669574 |
| H               | -3.95533  | 0.078263  | 0.761373  | H               | -4.028837 | -0.635619 | 0.208856  |
| C               | 3.350587  | 1.619679  | -1.50377  | C               | 3.124126  | 2.27224   | -1.023815 |
| H               | 3.184093  | -4.206149 | 2.168397  | H               | 3.555768  | -3.879845 | 2.072578  |

|   |           |           |           |   |           |           |           |
|---|-----------|-----------|-----------|---|-----------|-----------|-----------|
| H | 1.967146  | -2.682662 | 3.678278  | H | 1.937525  | -2.74127  | 3.544137  |
| H | 1.055491  | -0.548122 | 2.901378  | H | 0.770498  | -0.704423 | 2.851753  |
| H | 3.482735  | -3.584296 | -0.236157 | H | 4.011327  | -2.959906 | -0.208515 |
| H | 0.233598  | 0.997185  | 1.786134  | H | -0.164075 | 0.813625  | 1.788657  |
| H | 0.266088  | -0.149844 | -2.919364 | H | 0.564419  | 0.18129   | -2.959028 |
| H | -0.068238 | -1.253619 | -1.574627 | H | 0.291001  | -1.098362 | -1.765034 |
| H | -4.074623 | -0.367929 | -1.609099 | H | -3.815814 | -0.83196  | -2.192206 |
| H | 1.183587  | 2.852694  | -0.427462 | H | 0.636617  | 3.005822  | -0.174189 |
| H | 1.025705  | 5.123397  | -0.062907 | H | 0.129261  | 5.17548   | 0.394034  |
| H | -0.549363 | 5.597531  | 0.604428  | H | -1.524826 | 5.345698  | 1.015454  |
| H | 0.861198  | 5.560094  | 1.649954  | H | -0.167902 | 5.41055   | 2.128418  |
| H | -1.76913  | 3.949127  | 2.18548   | H | -1.620528 | 1.940651  | 2.667164  |
| H | -1.020793 | 2.408304  | 2.608755  | H | -1.154449 | 3.441224  | 3.501257  |
| H | -0.365254 | 3.936477  | 3.237214  | H | -2.525765 | 3.432293  | 2.40777   |
| H | -3.183149 | -1.9702   | 1.691338  | H | -3.661665 | -2.849268 | -0.841168 |
| H | -4.551447 | -2.543834 | -0.990601 | H | -0.781965 | -2.594874 | 0.166315  |
| H | -5.37116  | -1.943327 | 0.464475  | H | -1.294758 | -2.631807 | -1.536928 |
| H | -4.617589 | -3.542927 | 0.455968  | H | -1.522722 | -4.044377 | -0.512299 |
| H | -2.088467 | -3.755507 | 0.321118  | H | -3.367543 | -4.078991 | 1.236525  |
| H | -1.056906 | -2.335474 | 0.474271  | H | -4.320028 | -2.621854 | 1.552984  |
| H | -1.953722 | -2.634656 | -1.032305 | H | -2.616048 | -2.677319 | 2.020311  |
| H | 3.56316   | 2.556679  | -2.016522 | H | 3.230176  | 3.27524   | -1.434652 |
| H | 4.088908  | 0.869218  | -1.801047 | H | 4.010781  | 1.682957  | -1.275501 |
| H | 3.402316  | 1.776061  | -0.4218   | H | 3.020615  | 2.332423  | 0.063972  |

| 2R,5S,8S,10S-2C |           |           |           | 2R,5S,8S,10S-2D |           |           |           |
|-----------------|-----------|-----------|-----------|-----------------|-----------|-----------|-----------|
| C               | -3.85213  | -2.431225 | -1.65716  | C               | -3.240784 | -2.912882 | -1.565358 |
| C               | -2.969084 | -1.857558 | -2.582658 | C               | -2.48125  | -2.17133  | -2.481013 |
| C               | -2.08171  | -0.84709  | -2.240231 | C               | -1.792296 | -1.022147 | -2.120126 |
| C               | -2.087777 | -0.39429  | -0.919131 | C               | -1.874971 | -0.600734 | -0.791274 |
| C               | -2.951362 | -0.988147 | 0.017169  | C               | -2.608191 | -1.362088 | 0.135753  |
| C               | -3.844314 | -1.993513 | -0.344593 | C               | -3.305824 | -2.506106 | -0.244849 |
| N               | -1.350648 | 0.624248  | -0.351051 | N               | -1.331956 | 0.530803  | -0.208174 |
| C               | -1.494627 | 0.578703  | 1.100045  | C               | -1.425379 | 0.396039  | 1.254172  |
| C               | -2.695055 | -0.380241 | 1.31013   | C               | -2.464324 | -0.740614 | 1.438306  |
| C               | -0.112695 | 1.116239  | -0.922034 | C               | -0.167951 | 1.192679  | -0.772766 |
| N               | 1.018589  | 0.435637  | -0.28152  | N               | 1.03503   | 0.590642  | -0.196027 |
| C               | 1.026379  | 0.56718   | 1.162704  | C               | 1.079668  | 0.676546  | 1.251237  |
| C               | -0.250685 | -0.054269 | 1.730281  | C               | -0.099563 | -0.089455 | 1.849944  |
| O               | -3.247452 | -0.555755 | 2.375231  | O               | -2.982062 | -1.007776 | 2.500118  |
| O               | -1.766781 | 1.886708  | 1.532323  | O               | -1.761305 | 1.582627  | 1.895497  |
| C               | 1.78336   | -0.414363 | -0.998075 | C               | 1.838975  | -0.181767 | -0.961063 |
| C               | 2.889073  | -1.158787 | -0.279039 | C               | 2.860915  | -1.022301 | -0.222757 |
| N               | 3.065352  | -0.757157 | 1.101101  | N               | 3.238296  | -0.409335 | 1.037638  |
| C               | 2.237331  | -0.015171 | 1.851887  | C               | 2.398074  | 0.247992  | 1.857614  |

|   |           |           |           |   |           |           |           |
|---|-----------|-----------|-----------|---|-----------|-----------|-----------|
| C | -0.005838 | 2.615899  | -0.801965 | C | -0.216986 | 2.682299  | -0.561504 |
| O | 1.633818  | -0.597773 | -2.199209 | O | 1.738179  | -0.246507 | -2.178411 |
| O | 2.416352  | 0.206429  | 3.039522  | O | 2.659704  | 0.534404  | 3.014256  |
| C | 0.868727  | 3.365364  | -1.478977 | C | 0.447401  | 3.570206  | -1.306747 |
| C | 0.906206  | 4.85167   | -1.290628 | C | 0.33751   | 5.037526  | -1.023051 |
| C | 1.877554  | 2.82097   | -2.443103 | C | 1.348912  | 3.210467  | -2.447464 |
| C | 2.668802  | -2.678582 | -0.435526 | C | 2.343705  | -2.471951 | -0.034856 |
| C | 3.85204   | -3.460918 | 0.120267  | C | 1.998893  | -3.143648 | -1.358796 |
| C | 1.358475  | -3.135687 | 0.191627  | C | 3.372443  | -3.299788 | 0.728501  |
| H | 1.041884  | 1.63832   | 1.396313  | H | 0.978758  | 1.734981  | 1.515945  |
| H | 3.802704  | -0.898929 | -0.825622 | H | 3.74745   | -1.051738 | -0.861562 |
| C | -1.729342 | 2.126147  | 2.933156  | C | -3.031433 | 2.106533  | 1.529759  |
| H | -4.525976 | -3.217777 | -1.972049 | H | -3.761353 | -3.803328 | -1.894074 |
| H | -2.975805 | -2.214224 | -3.606532 | H | -2.426721 | -2.50471  | -3.511238 |
| H | -1.415405 | -0.433452 | -2.985608 | H | -1.211752 | -0.48402  | -2.857665 |
| H | -4.501299 | -2.425179 | 0.401591  | H | -3.86825  | -3.065455 | 0.493701  |
| H | -0.077337 | 0.812347  | -1.966678 | H | -0.130128 | 0.963464  | -1.835227 |
| H | -0.274041 | 0.04428   | 2.815561  | H | -0.141166 | 0.047648  | 2.930852  |
| H | -0.25531  | -1.123411 | 1.499269  | H | 0.018261  | -1.156383 | 1.641331  |
| H | 3.87912   | -1.110705 | 1.584443  | H | 4.119088  | -0.683714 | 1.448295  |
| H | -0.699394 | 3.081628  | -0.112777 | H | -0.827999 | 3.032359  | 0.261305  |
| H | 0.166226  | 5.190055  | -0.5637   | H | -0.329099 | 5.242648  | -0.183941 |
| H | 1.897991  | 5.170141  | -0.95135  | H | 1.322605  | 5.459456  | -0.796526 |
| H | 0.722126  | 5.363819  | -2.241255 | H | -0.035891 | 5.57069   | -1.904015 |
| H | 1.734469  | 1.766418  | -2.679991 | H | 1.402284  | 2.140125  | -2.647728 |
| H | 1.855044  | 3.394473  | -3.375217 | H | 1.026035  | 3.724558  | -3.358936 |
| H | 2.886445  | 2.937092  | -2.03067  | H | 2.365226  | 3.561765  | -2.237442 |
| H | 2.617767  | -2.84229  | -1.516184 | H | 1.4321    | -2.413826 | 0.573004  |
| H | 3.911916  | -3.37764  | 1.2101    | H | 2.875755  | -3.182417 | -2.012606 |
| H | 4.798838  | -3.116184 | -0.304964 | H | 1.203066  | -2.623696 | -1.892632 |
| H | 3.743796  | -4.522126 | -0.114839 | H | 1.673372  | -4.169779 | -1.171945 |
| H | 1.230897  | -4.212149 | 0.057739  | H | 3.012216  | -4.32421  | 0.845781  |
| H | 0.494206  | -2.644947 | -0.26581  | H | 3.564659  | -2.904349 | 1.728095  |
| H | 1.347481  | -2.93538  | 1.267625  | H | 4.320457  | -3.338442 | 0.181664  |
| H | -2.179363 | 3.108279  | 3.075533  | H | -3.103346 | 3.09021   | 1.991629  |
| H | -0.701866 | 2.155341  | 3.31138   | H | -3.840177 | 1.471567  | 1.903064  |
| H | -2.305628 | 1.382242  | 3.486167  | H | -3.116421 | 2.206983  | 0.44316   |

| 2R,5S,8S,10S-2E |          |           |          | 2R,5S,8S,10S-2F |          |           |          |
|-----------------|----------|-----------|----------|-----------------|----------|-----------|----------|
| C               | 2.800136 | -3.268423 | 1.786154 | C               | 3.063379 | -2.979207 | 1.731132 |
| C               | 2.10794  | -2.399476 | 2.640916 | C               | 2.144087 | -2.327107 | 2.56434  |
| C               | 1.591366 | -1.185421 | 2.210709 | C               | 1.481124 | -1.16964  | 2.181075 |
| C               | 1.784598 | -0.830462 | 0.874175 | C               | 1.759144 | -0.646242 | 0.916651 |
| C               | 2.447027 | -1.716728 | 0.00685  | C               | 2.653258 | -1.31913  | 0.065536 |
| C               | 2.971582 | -2.925981 | 0.456805 | C               | 3.320946 | -2.472553 | 0.469777 |

|   |           |           |           |   |           |           |           |
|---|-----------|-----------|-----------|---|-----------|-----------|-----------|
| N | 1.418178  | 0.337948  | 0.228709  | N | 1.274532  | 0.512326  | 0.335033  |
| C | 1.541472  | 0.12927   | -1.221841 | C | 1.58555   | 0.47915   | -1.102006 |
| C | 2.434439  | -1.134779 | -1.32204  | C | 2.688114  | -0.607534 | -1.198395 |
| C | 0.331216  | 1.16488   | 0.717122  | C | 0.017732  | 1.101682  | 0.755989  |
| N | -0.927997 | 0.696152  | 0.128383  | N | -1.072099 | 0.49801   | -0.018245 |
| C | -0.92512  | 0.699356  | -1.32246  | C | -0.917578 | 0.649246  | -1.45206  |
| C | 0.184508  | -0.221159 | -1.83487  | C | 0.381724  | -0.020189 | -1.903358 |
| O | 2.953609  | -1.508112 | -2.350419 | O | 3.373976  | -0.780977 | -2.181225 |
| O | 2.041381  | 1.234404  | -1.899769 | O | 1.957198  | 1.714407  | -1.618388 |
| C | -1.876779 | 0.160519  | 0.923341  | C | -2.027515 | -0.211658 | 0.61885   |
| C | -3.111438 | -0.418945 | 0.268042  | C | -3.067077 | -0.918855 | -0.223859 |
| N | -3.200995 | -0.148494 | -1.151652 | N | -3.057389 | -0.500103 | -1.612006 |
| C | -2.240059 | 0.319702  | -1.962968 | C | -2.079526 | 0.138849  | -2.272775 |
| C | 0.571394  | 2.623947  | 0.437964  | C | 0.037909  | 2.600431  | 0.630158  |
| O | -1.778041 | 0.111884  | 2.142974  | O | -2.073462 | -0.311065 | 1.838847  |
| O | -2.380462 | 0.449459  | -3.169083 | O | -2.095556 | 0.333929  | -3.478391 |
| C | 0.072593  | 3.625497  | 1.168639  | C | -0.629241 | 3.440332  | 1.427531  |
| C | 0.37302   | 5.049743  | 0.811413  | C | -0.530623 | 4.921555  | 1.219299  |
| C | -0.814264 | 3.448503  | 2.362669  | C | -1.516175 | 3.022768  | 2.560293  |
| C | -3.196392 | -1.925451 | 0.597362  | C | -2.938909 | -2.458653 | -0.113567 |
| C | -4.509936 | -2.517013 | 0.101838  | C | -1.557121 | -2.951527 | -0.522337 |
| C | -2.000443 | -2.699581 | 0.058449  | C | -3.33641  | -2.982559 | 1.260533  |
| H | -0.721273 | 1.7237    | -1.654274 | H | -0.858061 | 1.721975  | -1.670786 |
| H | -3.955297 | 0.07613   | 0.760793  | H | -4.030247 | -0.63125  | 0.209791  |
| C | 3.350502  | 1.621604  | -1.502543 | C | 3.124835  | 2.269066  | -1.026661 |
| H | 3.185004  | -4.205521 | 2.167856  | H | 3.555844  | -3.880187 | 2.07416   |
| H | 1.967272  | -2.682851 | 3.677934  | H | 1.938985  | -2.739672 | 3.545741  |
| H | 1.055186  | -0.548331 | 2.901476  | H | 0.772248  | -0.703056 | 2.852282  |
| H | 3.484049  | -3.582828 | -0.236423 | H | 4.010222  | -2.96251  | -0.208078 |
| H | 0.233028  | 0.997044  | 1.786535  | H | -0.16315  | 0.813861  | 1.787913  |
| H | 0.266949  | -0.148579 | -2.919303 | H | 0.563376  | 0.177988  | -2.959593 |
| H | -0.067133 | -1.253036 | -1.575074 | H | 0.289231  | -1.100326 | -1.764284 |
| H | -4.073812 | -0.369939 | -1.609816 | H | -3.817798 | -0.829568 | -2.19115  |
| H | 1.182984  | 2.853417  | -0.42619  | H | 0.637827  | 3.004723  | -0.176597 |
| H | 1.022838  | 5.124012  | -0.061912 | H | 0.133982  | 5.175065  | 0.391955  |
| H | -0.552913 | 5.597082  | 0.604564  | H | -1.51907  | 5.347187  | 1.015597  |
| H | 0.857067  | 5.560398  | 1.650907  | H | -0.160547 | 5.411029  | 2.126667  |
| H | -1.773398 | 3.946728  | 2.183501  | H | -1.616423 | 1.942913  | 2.668385  |
| H | -1.023214 | 2.407268  | 2.608404  | H | -1.146049 | 3.442536  | 3.501841  |
| H | -0.370698 | 3.936756  | 3.236837  | H | -2.519503 | 3.436204  | 2.411028  |
| H | -3.182109 | -1.972112 | 1.690529  | H | -3.665628 | -2.846091 | -0.838683 |
| H | -4.549763 | -2.545936 | -0.991704 | H | -0.785553 | -2.594078 | 0.168337  |
| H | -5.369963 | -1.946204 | 0.463421  | H | -1.298523 | -2.631595 | -1.534823 |
| H | -4.615507 | -3.545385 | 0.454629  | H | -1.527911 | -4.043253 | -0.509246 |
| H | -2.086159 | -3.756505 | 0.320194  | H | -3.372599 | -4.074644 | 1.239861  |

|   |           |           |           |   |           |           |           |
|---|-----------|-----------|-----------|---|-----------|-----------|-----------|
| H | -1.055474 | -2.335854 | 0.473557  | H | -4.323512 | -2.616266 | 1.555339  |
| H | -1.952006 | -2.635421 | -1.033101 | H | -2.619563 | -2.673209 | 2.022585  |
| H | 3.563012  | 2.558581  | -2.015365 | H | 3.231343  | 3.271703  | -1.438264 |
| H | 4.089133  | 0.871302  | -1.799454 | H | 4.011067  | 1.679082  | -1.2782   |
| H | 3.401825  | 1.77815   | -0.420578 | H | 3.021707  | 2.330106  | 0.061114  |

| 2R,5S,8S,10S-2G |           |           |           | 2R,5S,8S,10S-2H |           |           |           |
|-----------------|-----------|-----------|-----------|-----------------|-----------|-----------|-----------|
| C               | 3.239342  | -2.913306 | 1.565381  | C               | -3.061878 | -2.980402 | -1.731541 |
| C               | 2.479955  | -2.171574 | 2.481004  | C               | -2.142812 | -2.327793 | -2.564597 |
| C               | 1.791481  | -1.0221   | 2.120122  | C               | -1.480383 | -1.170083 | -2.181138 |
| C               | 1.8745    | -0.600604 | 0.791324  | C               | -1.758731 | -0.646963 | -0.916671 |
| C               | 2.607611  | -1.362089 | -0.135665 | C               | -2.652608 | -1.320357 | -0.065705 |
| C               | 3.304758  | -2.506406 | 0.244926  | C               | -3.319758 | -2.474021 | -0.470137 |
| N               | 1.331894  | 0.531194  | 0.208272  | N               | -1.274664 | 0.511731  | -0.334858 |
| C               | 1.425322  | 0.396364  | -1.254094 | C               | -1.585738 | 0.478207  | 1.102158  |
| C               | 2.464119  | -0.740425 | -1.438179 | C               | -2.687849 | -0.608955 | 1.198326  |
| C               | 0.167787  | 1.193     | 0.772782  | C               | -0.018139 | 1.10175   | -0.755692 |
| N               | -1.035125 | 0.590732  | 0.196139  | N               | 1.071956  | 0.498486  | 0.018499  |
| C               | -1.079821 | 0.676634  | -1.251128 | C               | 0.917301  | 0.649319  | 1.452343  |
| C               | 0.09951   | -0.089177 | -1.84987  | C               | -0.381729 | -0.020769 | 1.903454  |
| O               | 2.98202   | -1.007544 | -2.499917 | O               | -3.3737   | -0.782828 | 2.181087  |
| O               | 1.761373  | 1.582859  | -1.895492 | O               | -1.957916 | 1.713227  | 1.618725  |
| C               | -1.838756 | -0.182017 | 0.96115   | C               | 2.027866  | -0.2104   | -0.618732 |
| C               | -2.860303 | -1.022964 | 0.222761  | C               | 3.067659  | -0.917396 | 0.223852  |
| N               | -3.238093 | -0.409931 | -1.037472 | N               | 3.057658  | -0.499061 | 1.612123  |
| C               | -2.398237 | 0.247922  | -1.857406 | C               | 2.079423  | 0.139209  | 2.273001  |
| C               | 0.216702  | 2.682588  | 0.561318  | C               | -0.03903  | 2.600467  | -0.629676 |
| O               | -1.737957 | -0.246761 | 2.178499  | O               | 2.074033  | -0.309328 | -1.838758 |
| O               | -2.660169 | 0.534623  | -3.013901 | O               | 2.095248  | 0.333915  | 3.478679  |
| C               | -0.447528 | 3.570604  | 1.306572  | C               | 0.627221  | 3.440835  | -1.42731  |
| C               | -0.337603 | 5.03789   | 1.022693  | C               | 0.527876  | 4.921976  | -1.218847 |
| C               | -1.348796 | 3.211109  | 2.447556  | C               | 1.513741  | 3.023915  | -2.560637 |
| C               | -2.342367 | -2.472318 | 0.034516  | C               | 2.940135  | -2.457212 | 0.113077  |
| C               | -1.996919 | -3.144076 | 1.358256  | C               | 1.558536  | -2.950788 | 0.521641  |
| C               | -3.370836 | -3.30051  | -0.728819 | C               | 3.337914  | -2.980523 | -1.26117  |
| H               | -0.979085 | 1.735093  | -1.515822 | H               | 0.857325  | 1.721969  | 1.671333  |
| H               | -3.746787 | -1.05301  | 0.86161   | H               | 4.030749  | -0.629258 | -0.20962  |
| C               | 3.031475  | 2.106751  | -1.529623 | C               | -3.125709 | 2.267538  | 1.026985  |
| H               | 3.759514  | -3.803993 | 1.894073  | H               | -3.55392  | -3.881556 | -2.074719 |
| H               | 2.425151  | -2.505046 | 3.511184  | H               | -1.937452 | -2.740145 | -3.546033 |
| H               | 1.211005  | -0.483821 | 2.857606  | H               | -0.771656 | -0.703109 | -2.852232 |
| H               | 3.867096  | -3.065897 | -0.493582 | H               | -4.008864 | -2.964367 | 0.207611  |
| H               | 0.130035  | 0.96394   | 1.83527   | H               | 0.162918  | 0.814146  | -1.787645 |
| H               | 0.14111   | 0.047974  | -2.930771 | H               | -0.563488 | 0.177107  | 2.959727  |
| H               | -0.018163 | -1.15614  | -1.641336 | H               | -0.288778 | -1.100837 | 1.764156  |

|   |           |           |           |   |           |           |           |
|---|-----------|-----------|-----------|---|-----------|-----------|-----------|
| H | -4.118938 | -0.68441  | -1.44795  | H | 3.818141  | -0.828389 | 2.191248  |
| H | 0.827493  | 3.032523  | -0.26171  | H | -0.638735 | 3.004339  | 0.17745   |
| H | 0.329087  | 5.242908  | 0.183618  | H | -0.13637  | 5.175009  | -0.391068 |
| H | -1.322668 | 5.459821  | 0.796051  | H | 1.5162    | 5.348161  | -1.01571  |
| H | 0.035753  | 5.571145  | 1.903623  | H | 0.156954  | 5.411335  | -2.125933 |
| H | -2.364955 | 3.563131  | 2.238008  | H | 1.614745  | 1.944134  | -2.668744 |
| H | -1.402782 | 2.140748  | 2.647554  | H | 1.142679  | 3.443357  | -3.501963 |
| H | -1.025259 | 3.724801  | 3.359026  | H | 2.516846  | 3.438128  | -2.412042 |
| H | -1.430912 | -2.413661 | -0.573512 | H | 3.666994  | -2.844571 | 0.838095  |
| H | -2.873538 | -3.183255 | 2.012363  | H | 0.786831  | -2.593387 | -0.168909 |
| H | -1.201078 | -2.623927 | 1.891881  | H | 1.299794  | -2.631329 | 1.53424   |
| H | -1.671084 | -4.170063 | 1.171157  | H | 1.529759  | -4.04252  | 0.508151  |
| H | -3.010161 | -4.324746 | -0.846334 | H | 3.374585  | -4.072598 | -1.240826 |
| H | -3.563383 | -2.904981 | -1.728312 | H | 4.324866  | -2.613701 | -1.555822 |
| H | -4.318762 | -3.339684 | -0.181862 | H | 2.620964  | -2.671263 | -2.02316  |
| H | 3.103524  | 3.090344  | -1.991651 | H | -3.232709 | 3.270017  | 1.438845  |
| H | 3.840239  | 1.471666  | -1.902683 | H | -4.011725 | 1.677107  | 1.278236  |
| H | 3.11628   | 2.207376  | -0.443027 | H | -3.022454 | 2.328917  | -0.060759 |

| 2R,5S,8S,10S-2I |           |           |           | 2R,5S,8S,10S-2J |           |           |           |
|-----------------|-----------|-----------|-----------|-----------------|-----------|-----------|-----------|
| C               | -2.803347 | -3.266373 | -1.785946 | C               | -3.238903 | -2.913993 | -1.565027 |
| C               | -2.110558 | -2.398004 | -2.640815 | C               | -2.478909 | -2.172902 | -2.480668 |
| C               | -1.592864 | -1.184399 | -2.210686 | C               | -1.790579 | -1.023242 | -2.120107 |
| C               | -1.785558 | -0.829279 | -0.874115 | C               | -1.87444  | -0.600853 | -0.791648 |
| C               | -2.448596 | -1.714999 | -0.006686 | C               | -2.60805  | -1.361761 | 0.135415  |
| C               | -2.974256 | -2.923801 | -0.456562 | C               | -3.305031 | -2.506286 | -0.244858 |
| N               | -1.418027 | 0.338788  | -0.228693 | N               | -1.332194 | 0.531349  | -0.209009 |
| C               | -1.541322 | 0.130248  | 1.221881  | C               | -1.426061 | 0.397154  | 1.253409  |
| C               | -2.435254 | -1.133103 | 1.322213  | C               | -2.465104 | -0.739393 | 1.437657  |
| C               | -0.330569 | 1.164942  | -0.717285 | C               | -0.167852 | 1.192828  | -0.773385 |
| N               | 0.928409  | 0.695493  | -0.128584 | N               | 1.034843  | 0.590594  | -0.196261 |
| C               | 0.925576  | 0.698745  | 1.322255  | C               | 1.079147  | 0.677031  | 1.250983  |
| C               | -0.184534 | -0.221134 | 1.83473   | C               | -0.100462 | -0.088366 | 1.8497    |
| O               | -2.954511 | -1.506043 | 2.350694  | O               | -2.983525 | -1.005861 | 2.499304  |
| O               | -2.040318 | 1.235787  | 1.899809  | O               | -1.762076 | 1.583958  | 1.89423   |
| C               | 1.876716  | 0.15898   | -0.923529 | C               | 1.838462  | -0.182663 | -0.960782 |
| C               | 3.111183  | -0.420919 | -0.268253 | C               | 2.860061  | -1.023122 | -0.221902 |
| N               | 3.201042  | -0.150175 | 1.151367  | N               | 3.237457  | -0.409617 | 1.038223  |
| C               | 2.240357  | 0.31847   | 1.962733  | C               | 2.397346  | 0.248382  | 1.857777  |
| C               | -0.569749 | 2.624208  | -0.438253 | C               | -0.2166   | 2.682497  | -0.562358 |
| O               | 1.777768  | 0.110059  | -2.143132 | O               | 1.737719  | -0.248062 | -2.178101 |
| O               | 2.380896  | 0.448219  | 3.168826  | O               | 2.658924  | 0.535311  | 3.014296  |
| C               | -0.069817 | 3.625342  | -1.168722 | C               | 0.448795  | 3.570054  | -1.307116 |
| C               | -0.369166 | 5.049844  | -0.811622 | C               | 0.339118  | 5.037463  | -1.023788 |
| C               | 0.817374  | 3.447565  | -2.362386 | C               | 1.351273  | 3.209837  | -2.446909 |

|   |           |           |           |   |           |           |           |
|---|-----------|-----------|-----------|---|-----------|-----------|-----------|
| C | 3.195487  | -1.927527 | -0.597265 | C | 2.342615  | -2.472607 | -0.033369 |
| C | 4.508881  | -2.519498 | -0.101818 | C | 1.998552  | -3.145055 | -1.35712  |
| C | 1.999314  | -2.701074 | -0.058023 | C | 3.370908  | -3.299961 | 0.731125  |
| H | 0.722275  | 1.723211  | 1.654036  | H | 0.97851   | 1.735613  | 1.515231  |
| H | 3.955192  | 0.073691  | -0.761219 | H | 3.746684  | -1.05309  | -0.860564 |
| C | -3.349281 | 1.623815  | 1.502845  | C | -3.032061 | 2.107845  | 1.527946  |
| H | -3.189088 | -4.203134 | -2.167595 | H | -3.758936 | -3.804856 | -1.893463 |
| H | -1.970318 | -2.681479 | -3.677865 | H | -2.423473 | -2.507066 | -3.510589 |
| H | -1.056271 | -0.54776  | -2.901548 | H | -1.209466 | -0.485577 | -2.857532 |
| H | -3.487168 | -3.580211 | 0.236752  | H | -3.867779 | -3.065324 | 0.493681  |
| H | -0.232566 | 0.996909  | -1.786686 | H | -0.129864 | 0.963549  | -1.835822 |
| H | -0.266789 | -0.14859  | 2.91918   | H | -0.1423   | 0.049181  | 2.930541  |
| H | 0.066399  | -1.253152 | 1.574803  | H | 0.017097  | -1.155423 | 1.64157   |
| H | 4.073799  | -0.37196  | 1.60948   | H | 4.118197  | -0.683932 | 1.449028  |
| H | -1.181544 | 2.854153  | 0.425627  | H | -0.828205 | 3.032862  | 0.259874  |
| H | -1.019478 | 5.124671  | 0.061286  | H | -0.328413 | 5.24297   | -0.185503 |
| H | 0.557146  | 5.596302  | -0.604134 | H | 1.324094  | 5.459077  | -0.796176 |
| H | -0.852178 | 5.56101   | -1.651401 | H | -0.03306  | 5.570613  | -1.90528  |
| H | 1.02551   | 2.406147  | -2.608029 | H | 1.404337  | 2.139472  | -2.647123 |
| H | 0.374554  | 3.936168  | -3.23674  | H | 1.029611  | 3.724115  | -3.358708 |
| H | 1.776856  | 3.94499   | -2.182867 | H | 2.367537  | 3.560653  | -2.235825 |
| H | 3.181024  | -1.974409 | -1.69042  | H | 1.430659  | -2.414117 | 0.573938  |
| H | 4.548845  | -2.548233 | 0.991725  | H | 2.875849  | -3.184489 | -2.010307 |
| H | 5.369069  | -1.949071 | -0.46362  | H | 1.203211  | -2.625212 | -1.891779 |
| H | 4.614022  | -3.547974 | -0.45443  | H | 1.672612  | -4.170981 | -1.169864 |
| H | 2.084587  | -3.758092 | -0.319529 | H | 3.011049  | -4.324552 | 0.848036  |
| H | 1.054442  | -2.337074 | -0.473113 | H | 3.561775  | -2.904378 | 1.730919  |
| H | 1.951023  | -2.636639 | 1.033517  | H | 4.319575  | -3.33816  | 0.185373  |
| H | -3.560714 | 2.561455  | 2.0149    | H | -3.103973 | 3.091739  | 1.989354  |
| H | -4.088421 | 0.874425  | 1.800783  | H | -3.840957 | 1.473128  | 1.901341  |
| H | -3.400957 | 1.779438  | 0.420761  | H | -3.116767 | 2.207804  | 0.441281  |

| 2R,5S,8S,10S-2K |           |           |           | 2R,5S,8S,10S-2L |           |           |           |
|-----------------|-----------|-----------|-----------|-----------------|-----------|-----------|-----------|
| C               | 2.803391  | -3.266236 | 1.785547  | C               | 3.061737  | -2.980949 | 1.732015  |
| C               | 2.110287  | -2.398224 | 2.640523  | C               | 2.143104  | -2.327719 | 2.565065  |
| C               | 1.59257   | -1.184535 | 2.210657  | C               | 1.480821  | -1.170038 | 2.181271  |
| C               | 1.785565  | -0.828956 | 0.874252  | C               | 1.758867  | -0.647583 | 0.91646   |
| C               | 2.448923  | -1.714318 | 0.006705  | C               | 2.652303  | -1.321604 | 0.065516  |
| C               | 2.974601  | -2.92321  | 0.456318  | C               | 3.319312  | -2.475234 | 0.470283  |
| N               | 1.418057  | 0.33929   | 0.229116  | N               | 1.274904  | 0.510941  | 0.334265  |
| C               | 1.541636  | 0.131151  | -1.221505 | C               | 1.585608  | 0.476774  | -1.102804 |
| C               | 2.435818  | -1.132008 | -1.322015 | C               | 2.687309  | -0.61081  | -1.198858 |
| C               | 0.330278  | 1.165036  | 0.717697  | C               | 0.018764  | 1.101674  | 0.755261  |
| N               | -0.92847  | 0.695274  | 0.128757  | N               | -1.07182  | 0.498864  | -0.018589 |
| C               | -0.925467 | 0.698947  | -1.322082 | C               | -0.917308 | 0.64913   | -1.45251  |

|   |           |           |           |   |           |           |           |
|---|-----------|-----------|-----------|---|-----------|-----------|-----------|
| C | 0.185028  | -0.220402 | -1.834679 | C | 0.381185  | -0.022005 | -1.90358  |
| O | 2.955366  | -1.504555 | -2.350491 | O | 3.372743  | -0.785361 | -2.181792 |
| O | 2.040512  | 1.236956  | -1.899068 | O | 1.958105  | 1.711475  | -1.619918 |
| C | -1.876653 | 0.158156  | 0.923435  | C | -2.028179 | -0.209073 | 0.61902   |
| C | -3.110777 | -0.422114 | 0.267844  | C | -3.06868  | -0.915499 | -0.223172 |
| N | -3.20056  | -0.151069 | -1.151722 | N | -3.058609 | -0.497582 | -1.611568 |
| C | -2.240023 | 0.318343  | -1.96282  | C | -2.079952 | 0.139649  | -2.272819 |
| C | 0.569014  | 2.624428  | 0.438902  | C | 0.040412  | 2.600349  | 0.628981  |
| O | -1.777851 | 0.108969  | 2.14304   | O | -2.074224 | -0.307602 | 1.839083  |
| O | -2.38051  | 0.448469  | -3.168879 | O | -2.095799 | 0.333959  | -3.478561 |
| C | 0.068013  | 3.625269  | 1.169037  | C | -0.624511 | 3.441273  | 1.427137  |
| C | 0.366858  | 5.04995   | 0.81223   | C | -0.524462 | 4.922312  | 1.21829   |
| C | -0.820007 | 3.44693   | 2.361997  | C | -1.510139 | 3.025132  | 2.561453  |
| C | -3.194452 | -1.928841 | 0.596476  | C | -2.942357 | -2.455382 | -0.111979 |
| C | -4.507548 | -2.521256 | 0.100767  | C | -1.56127  | -2.950188 | -0.520781 |
| C | -1.997895 | -2.701731 | 0.057144  | C | -3.340158 | -2.977954 | 1.262542  |
| H | -0.722502 | 1.723586  | -1.653533 | H | -0.856584 | 1.721664  | -1.671863 |
| H | -3.955072 | 0.071997  | 0.76082   | H | -4.031464 | -0.626486 | 0.210393  |
| C | 3.349356  | 1.625116  | -1.501828 | C | 3.126188  | 2.265635  | -1.028613 |
| H | 3.189134  | -4.203081 | 2.166984  | H | 3.553689  | -3.882048 | 2.075465  |
| H | 1.969807  | -2.682058 | 3.677442  | H | 1.937981  | -2.739546 | 3.546771  |
| H | 1.055709  | -0.548193 | 2.901583  | H | 0.772463  | -0.702554 | 2.8524    |
| H | 3.487759  | -3.579338 | -0.23708  | H | 4.008082  | -2.966062 | -0.207458 |
| H | 0.232199  | 0.996824  | 1.787066  | H | -0.162215 | 0.814341  | 1.787299  |
| H | 0.26744   | -0.147479 | -2.919092 | H | 0.562829  | 0.175181  | -2.960002 |
| H | -0.065641 | -1.252584 | -1.575147 | H | 0.287638  | -1.101938 | -1.763629 |
| H | -4.073173 | -0.373078 | -1.610002 | H | -3.819462 | -0.826477 | -2.190451 |
| H | 1.181355  | 2.854708  | -0.424498 | H | 0.639516  | 3.003716  | -0.17885  |
| H | 1.01792   | 5.125168  | -0.060087 | H | 0.139316  | 5.174787  | 0.389965  |
| H | -0.559593 | 5.59585   | 0.603887  | H | -1.512693 | 5.34902   | 1.015791  |
| H | 0.848788  | 5.561405  | 1.652452  | H | -0.15259  | 5.411653  | 2.124996  |
| H | -1.779697 | 3.943673  | 2.181688  | H | -1.612116 | 1.94544   | 2.66956   |
| H | -1.027595 | 2.405376  | 2.607536  | H | -1.137568 | 3.444112  | 3.502389  |
| H | -0.378229 | 3.935889  | 3.236679  | H | -2.512995 | 3.440364  | 2.414049  |
| H | -3.180064 | -1.975983 | 1.689621  | H | -3.669733 | -2.842368 | -0.836678 |
| H | -4.547414 | -2.549705 | -0.992786 | H | -0.789091 | -2.593181 | 0.169437  |
| H | -5.368012 | -1.951301 | 0.462657  | H | -1.302551 | -2.631263 | -1.533555 |
| H | -4.612268 | -3.549874 | 0.453091  | H | -1.533358 | -4.041938 | -0.506947 |
| H | -2.082679 | -3.758835 | 0.318464  | H | -3.377841 | -4.070001 | 1.242507  |
| H | -1.053203 | -2.33736  | 0.472323  | H | -4.326663 | -2.610133 | 1.557443  |
| H | -1.949601 | -2.637085 | -1.034382 | H | -2.622655 | -2.669151 | 2.024196  |
| H | 3.560672  | 2.562941  | -2.013593 | H | 3.233558  | 3.267838  | -1.441047 |
| H | 4.088672  | 0.875949  | -1.799887 | H | 4.011941  | 1.674705  | -1.279627 |
| H | 3.400866  | 1.780443  | -0.419694 | H | 3.023074  | 2.327666  | 0.059107  |

| 2R,5S,8S,10S-2M |           |           |           |
|-----------------|-----------|-----------|-----------|
| C               | 3.233173  | -2.919962 | 1.565161  |
| C               | 2.475116  | -2.176818 | 2.480753  |
| C               | 1.789062  | -1.025894 | 2.11992   |
| C               | 1.873264  | -0.604326 | 0.791221  |
| C               | 2.604869  | -1.367241 | -0.135786 |
| C               | 3.299613  | -2.513038 | 0.24477   |
| N               | 1.333084  | 0.528674  | 0.208301  |
| C               | 1.426155  | 0.393708  | -1.254073 |
| C               | 2.462708  | -0.745166 | -1.438239 |
| C               | 0.170321  | 1.19278   | 0.772857  |
| N               | -1.033838 | 0.592901  | 0.196287  |
| C               | -1.078462 | 0.678918  | -1.250988 |
| C               | 0.099327  | -0.089241 | -1.84974  |
| O               | 2.980109  | -1.013188 | -2.500002 |
| O               | 1.764467  | 1.579555  | -1.89548  |
| C               | -1.838535 | -0.178788 | 0.961266  |
| C               | -2.86198  | -1.01745  | 0.222897  |
| N               | -3.238825 | -0.403429 | -1.037144 |
| C               | -2.397863 | 0.252933  | -1.85713  |
| C               | 0.222271  | 2.682246  | 0.561396  |
| O               | -1.737376 | -0.244231 | 2.178548  |
| O               | -2.659489 | 0.540412  | -3.013506 |
| C               | -0.440093 | 3.57158   | 1.306726  |
| C               | -0.327011 | 5.038667  | 1.023069  |
| C               | -1.34221  | 3.213839  | 2.447602  |
| C               | -2.347475 | -2.467973 | 0.034217  |
| C               | -2.003844 | -3.140928 | 1.357809  |
| C               | -3.378017 | -3.293343 | -0.729393 |
| H               | -0.975652 | 1.737172  | -1.515683 |
| H               | -3.748362 | -1.045681 | 0.861975  |
| C               | 3.035532  | 2.101091  | -1.529598 |
| H               | 3.751468  | -3.811748 | 1.893838  |
| H               | 2.419397  | -2.510368 | 3.510859  |
| H               | 1.209387  | -0.486632 | 2.857313  |
| H               | 3.860868  | -3.073613 | -0.493737 |
| H               | 0.132208  | 0.963895  | 1.835369  |
| H               | 0.141159  | 0.047682  | -2.930662 |
| H               | -0.020395 | -1.155941 | -1.641026 |
| H               | -4.120471 | -0.675791 | -1.447298 |
| H               | 0.833808  | 3.030969  | -0.2616   |
| H               | 0.339765  | 5.24234   | 0.183737  |
| H               | -1.311218 | 5.46289   | 0.797002  |
| H               | 0.047988  | 5.57087   | 1.903944  |
| H               | -2.357746 | 3.567439  | 2.237725  |

|   |           |           |           |
|---|-----------|-----------|-----------|
| H | -1.397959 | 2.143605  | 2.647845  |
| H | -1.018044 | 3.727185  | 3.359035  |
| H | -1.435842 | -2.411438 | -0.573756 |
| H | -2.880812 | -3.178642 | 2.011537  |
| H | -1.207182 | -2.622521 | 1.891892  |
| H | -1.67997  | -4.167491 | 1.170447  |
| H | -3.020296 | -4.318656 | -0.846513 |
| H | -3.569037 | -2.897493 | -1.729042 |
| H | -4.326278 | -3.329618 | -0.182801 |
| H | 3.109635  | 3.084307  | -1.992105 |
| H | 3.843124  | 1.464224  | -1.902161 |
| H | 3.120299  | 2.202095  | -0.443037 |

Key transitions, oscillator strengths, and rotatory strengths in the ECD of conformers **2R,5S,8S,10S-2K** with cam-b3lyp function applying def2tzvpp basis set in methanol solvent.

| Species                | Excited State | $\Delta E(eV)^a$ | $\lambda(nm)^b$ | $f^c$  | $R_{vel}^d$ |
|------------------------|---------------|------------------|-----------------|--------|-------------|
| <b>2R,5S,8S,10S-2K</b> | 104 -> 107    | 3.6898           | 336.02          | 0.0782 | 81.0465     |
|                        | 98 -> 107     | 3.9232           | 316.02          | 0.0088 | -67.2873    |
|                        | 102 -> 107    | 5.1336           | 241.52          | 0.0394 | 11.7554     |
|                        | 98 -> 107     | 5.6172           | 220.72          | 0.059  | -8.0761     |
|                        | 102 -> 107    | 5.6603           | 219.04          | 0.6641 | -48.8242    |
|                        | 99 -> 108     | 5.8675           | 211.31          | 0.0009 | 7.4133      |
|                        | 99 -> 109     | 5.902            | 210.07          | 0.001  | 10.2483     |
|                        | 97 -> 107     | 6.0048           | 206.48          | 0.0019 | -10.6372    |
|                        | 97 -> 107     | 6.1388           | 201.97          | 0.001  | 3.3009      |
|                        | 97 -> 107     | 6.2134           | 199.54          | 0.0068 | -10.6007    |
|                        | 105 -> 109    | 6.2915           | 197.07          | 0.1044 | -61.8421    |
|                        | 98 -> 107     | 6.4548           | 192.08          | 0.0034 | -3.3723     |
|                        | 97 -> 107     | 6.6671           | 185.96          | 0.0554 | -3.6749     |
|                        | 101 -> 109    | 6.6759           | 185.72          | 0.3208 | -34.5654    |
|                        | 104 -> 108    | 6.7359           | 184.07          | 0.046  | 41.8873     |
|                        | 91 -> 107     | 6.8091           | 182.09          | 0.0247 | -2.1455     |
|                        | 97 -> 107     | 6.8117           | 182.02          | 0.0957 | 10.0024     |
|                        | 97 -> 107     | 6.9145           | 179.31          | 0.0761 | 6.0325      |
|                        | 90 -> 107     | 6.9737           | 177.79          | 0.1206 | -127.4564   |
|                        | 100 -> 109    | 7.0248           | 176.5           | 0.024  | 19.9779     |
|                        | 99 -> 109     | 7.0841           | 175.02          | 0.0707 | -56.7047    |
|                        | 97 -> 107     | 7.1073           | 174.45          | 0.0427 | -17.9939    |
|                        | 90 -> 107     | 7.1267           | 173.97          | 0.0644 | -22.5211    |
|                        | 99 -> 109     | 7.1759           | 172.78          | 0.05   | 127.1872    |
|                        | 100 -> 109    | 7.2286           | 171.52          | 0.2363 | -19.7235    |
|                        | 100 -> 108    | 7.3392           | 168.93          | 0.0126 | -9.1887     |
|                        | 102 -> 110    | 7.3704           | 168.22          | 0.0067 | 4.7305      |
|                        | 86 -> 107     | 7.3908           | 167.75          | 0.0096 | -6.4449     |
|                        | 99 -> 109     | 7.4583           | 166.24          | 0.1351 | 101.6966    |

|  |            |        |        |        |          |
|--|------------|--------|--------|--------|----------|
|  | 86 -> 107  | 7.5458 | 164.31 | 0.0133 | 3.4142   |
|  | 86 -> 107  | 7.5482 | 164.26 | 0.0965 | 82.4922  |
|  | 86 -> 107  | 7.5836 | 163.49 | 0.0991 | -7.7133  |
|  | 99 -> 110  | 7.6178 | 162.76 | 0.048  | -21.1836 |
|  | 101 -> 108 | 7.7136 | 160.73 | 0.0286 | 20.6891  |
|  | 98 -> 109  | 7.7517 | 159.94 | 0.0024 | 0.942    |
|  | 101 -> 108 | 7.8042 | 158.87 | 0.0006 | -3.7867  |
|  | 86 -> 107  | 7.8198 | 158.55 | 0.008  | -34.4234 |
|  | 86 -> 107  | 7.8264 | 158.42 | 0.0303 | -7.3201  |
|  | 101 -> 110 | 7.8818 | 157.3  | 0.0012 | -0.0077  |
|  | 99 -> 109  | 7.9184 | 156.58 | 0.0401 | 47.9556  |
|  | 101 -> 110 | 7.9406 | 156.14 | 0.0101 | 10.5189  |
|  | 99 -> 109  | 8.0104 | 154.78 | 0.0274 | -37.5008 |
|  | 97 -> 108  | 8.0233 | 154.53 | 0.0469 | 34.4456  |
|  | 99 -> 108  | 8.037  | 154.27 | 0.0245 | 13.5068  |
|  | 99 -> 108  | 8.1312 | 152.48 | 0.0224 | 19.9703  |
|  | 81 -> 107  | 8.1511 | 152.11 | 0.0076 | -5.0236  |
|  | 81 -> 107  | 8.1595 | 151.95 | 0.0055 | 11.336   |
|  | 95 -> 109  | 8.2073 | 151.07 | 0.0136 | 33.6118  |
|  | 100 -> 109 | 8.2177 | 150.87 | 0.0042 | 1.2194   |
|  | 99 -> 109  | 8.2461 | 150.36 | 0.0063 | 22.8511  |

<sup>a</sup>Excitation energy. <sup>b</sup>Wavelength. <sup>c</sup>Oscillator strength. <sup>d</sup>Rotatory strength in velocity form (10<sup>-40</sup>cgs.).

### Quantum-chemical computation for <sup>13</sup>C NMR

To verify the structure of **2**, the quantum chemical prediction on the <sup>13</sup>C NMR shifts of 2S\*,5R\*,8R\*,10R\*-**2** was executed with scaling methods [1,2]. Conformational analyses of **2** were performed using the same method as the calculated ECD, the above mentioned. Conformations were optimized with M062X function applying 6-31G(d) basis set in the gas phase. NMR calculations were carried out with mPW1PW91 function applying 6-31G(d) basis set in chloroform solvent with SMD solvation model.

1. Li, J.; Liu, J. K.; Wang, W. X. GIAO <sup>13</sup>C NMR Calculation with Sorted Training Sets Improves Accuracy and Reliability for Structural Assignment. *J. Org. Chem.* **2020**, *85*, 11350–11358.
2. Lodewyk, M. W.; Siebert, M. R.; Tantillo, D. J. Computational prediction of <sup>1</sup>H and <sup>13</sup>C chemical shifts: a useful tool for natural product, mechanistic, and synthetic organic chemistry. *Chem. Rev.* **2012**, *112*, 1839–1862.

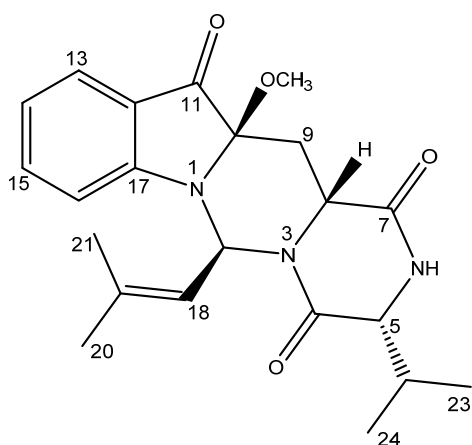

2*S*\*,5*R*\*,8*R*\*,10*R*\*-2

Optimized coordinates (Å) of **2** in gas phase at M062X/6-31G(d) level.

|   |           |           |           |
|---|-----------|-----------|-----------|
| C | -2.701627 | -3.318374 | -1.617503 |
| C | -1.881821 | -2.587171 | -2.488203 |
| C | -1.3895   | -1.324344 | -2.170649 |
| C | -1.746343 | -0.781685 | -0.932264 |
| C | -2.531205 | -1.532856 | -0.0427   |
| C | -3.027875 | -2.7887   | -0.376771 |
| N | -1.43321  | 0.476068  | -0.404756 |
| C | -1.649774 | 0.412232  | 1.059137  |
| C | -2.64107  | -0.77296  | 1.206049  |
| C | -0.255447 | 1.185806  | -0.876529 |
| N | 0.939061  | 0.664122  | -0.192849 |
| C | 0.865896  | 0.780334  | 1.259411  |
| C | -0.355399 | 0.011097  | 1.784957  |
| O | -3.298066 | -0.988938 | 2.197294  |
| O | -2.089709 | 1.609755  | 1.605789  |
| C | 1.830333  | -0.079932 | -0.892833 |
| C | 2.980976  | -0.727212 | -0.13643  |
| N | 3.053095  | -0.326916 | 1.256782  |
| C | 2.106097  | 0.305565  | 1.994573  |
| C | -0.389948 | 2.682844  | -0.69478  |
| O | 1.756704  | -0.253567 | -2.103596 |
| O | 2.211315  | 0.493551  | 3.191913  |
| C | 0.445066  | 3.570629  | -1.241811 |
| C | 0.262305  | 5.046498  | -1.011753 |
| C | 1.628329  | 3.197632  | -2.095276 |
| C | 2.894146  | -2.259911 | -0.32353  |
| C | 4.10595   | -2.950826 | 0.299611  |
| C | 1.589441  | -2.825937 | 0.234156  |
| H | 0.751566  | 1.843535  | 1.50333   |
| H | 3.888579  | -0.378021 | -0.645086 |
| C | -3.3718   | 2.023642  | 1.155824  |

|   |           |           |           |
|---|-----------|-----------|-----------|
| H | -3.059828 | -4.299369 | -1.909583 |
| H | -1.611622 | -3.020332 | -3.446739 |
| H | -0.727021 | -0.807679 | -2.855898 |
| H | -3.63611  | -3.331763 | 0.340316  |
| H | -0.120745 | 0.949378  | -1.931486 |
| H | -0.483061 | 0.190254  | 2.854464  |
| H | -0.181679 | -1.059683 | 1.628169  |
| H | 3.858446  | -0.627038 | 1.794173  |
| H | -1.208629 | 3.025895  | -0.071455 |
| H | -0.587291 | 5.253759  | -0.356892 |
| H | 1.161834  | 5.480502  | -0.55912  |
| H | 0.10407   | 5.567815  | -1.963201 |
| H | 1.631273  | 2.151938  | -2.411619 |
| H | 1.662176  | 3.829722  | -2.989841 |
| H | 2.559171  | 3.383354  | -1.54413  |
| H | 2.912358  | -2.412154 | -1.408229 |
| H | 4.087045  | -2.874638 | 1.393186  |
| H | 5.047128  | -2.521818 | -0.061799 |
| H | 4.106311  | -4.016152 | 0.052344  |
| H | 1.548998  | -3.909055 | 0.086067  |
| H | 0.711855  | -2.393806 | -0.262589 |
| H | 1.514922  | -2.637395 | 1.311961  |
| H | -3.524569 | 3.028525  | 1.551179  |
| H | -4.150474 | 1.358039  | 1.540717  |
| H | -3.409648 | 2.048634  | 0.060202  |

**Figure S4.** HRESIMS of compound **1**

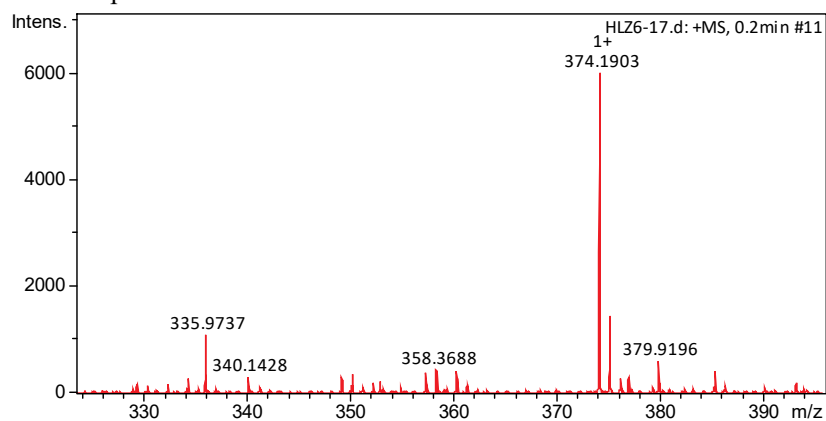

**Figure S5.** UV of compound **1** (in MeOH)

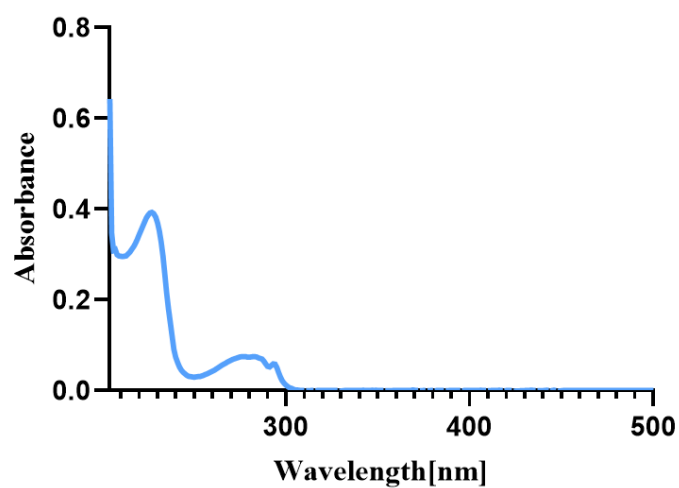

**Figure S6.** IR of compound **1** (KBr disc)

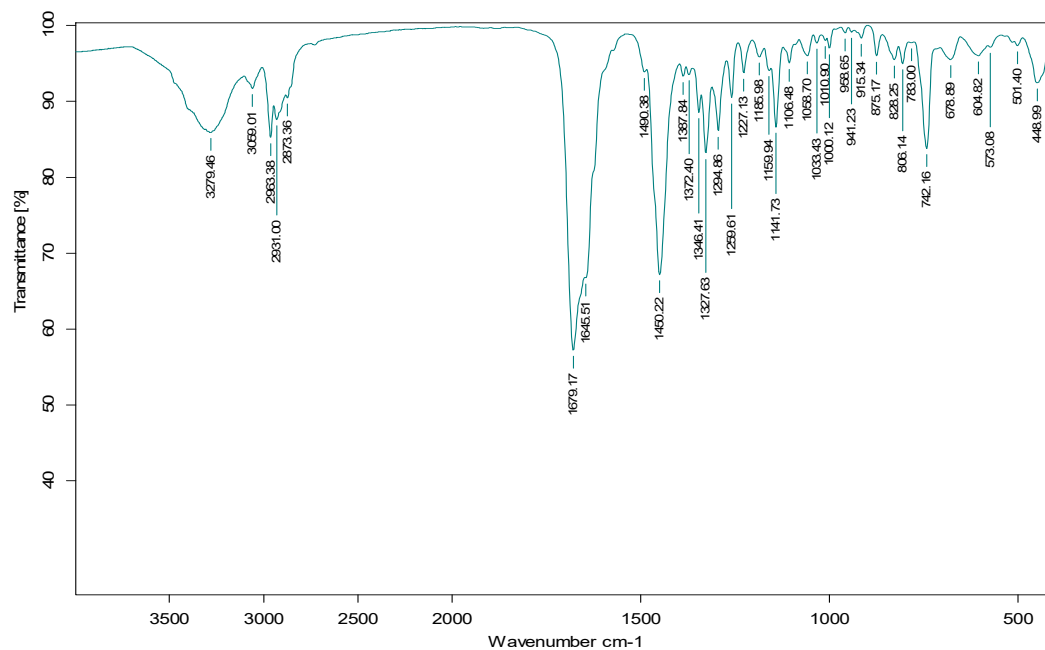

**Figure S7.**  $^1\text{H}$  NMR spectrum of compound **1** (in  $\text{CDCl}_3$ )

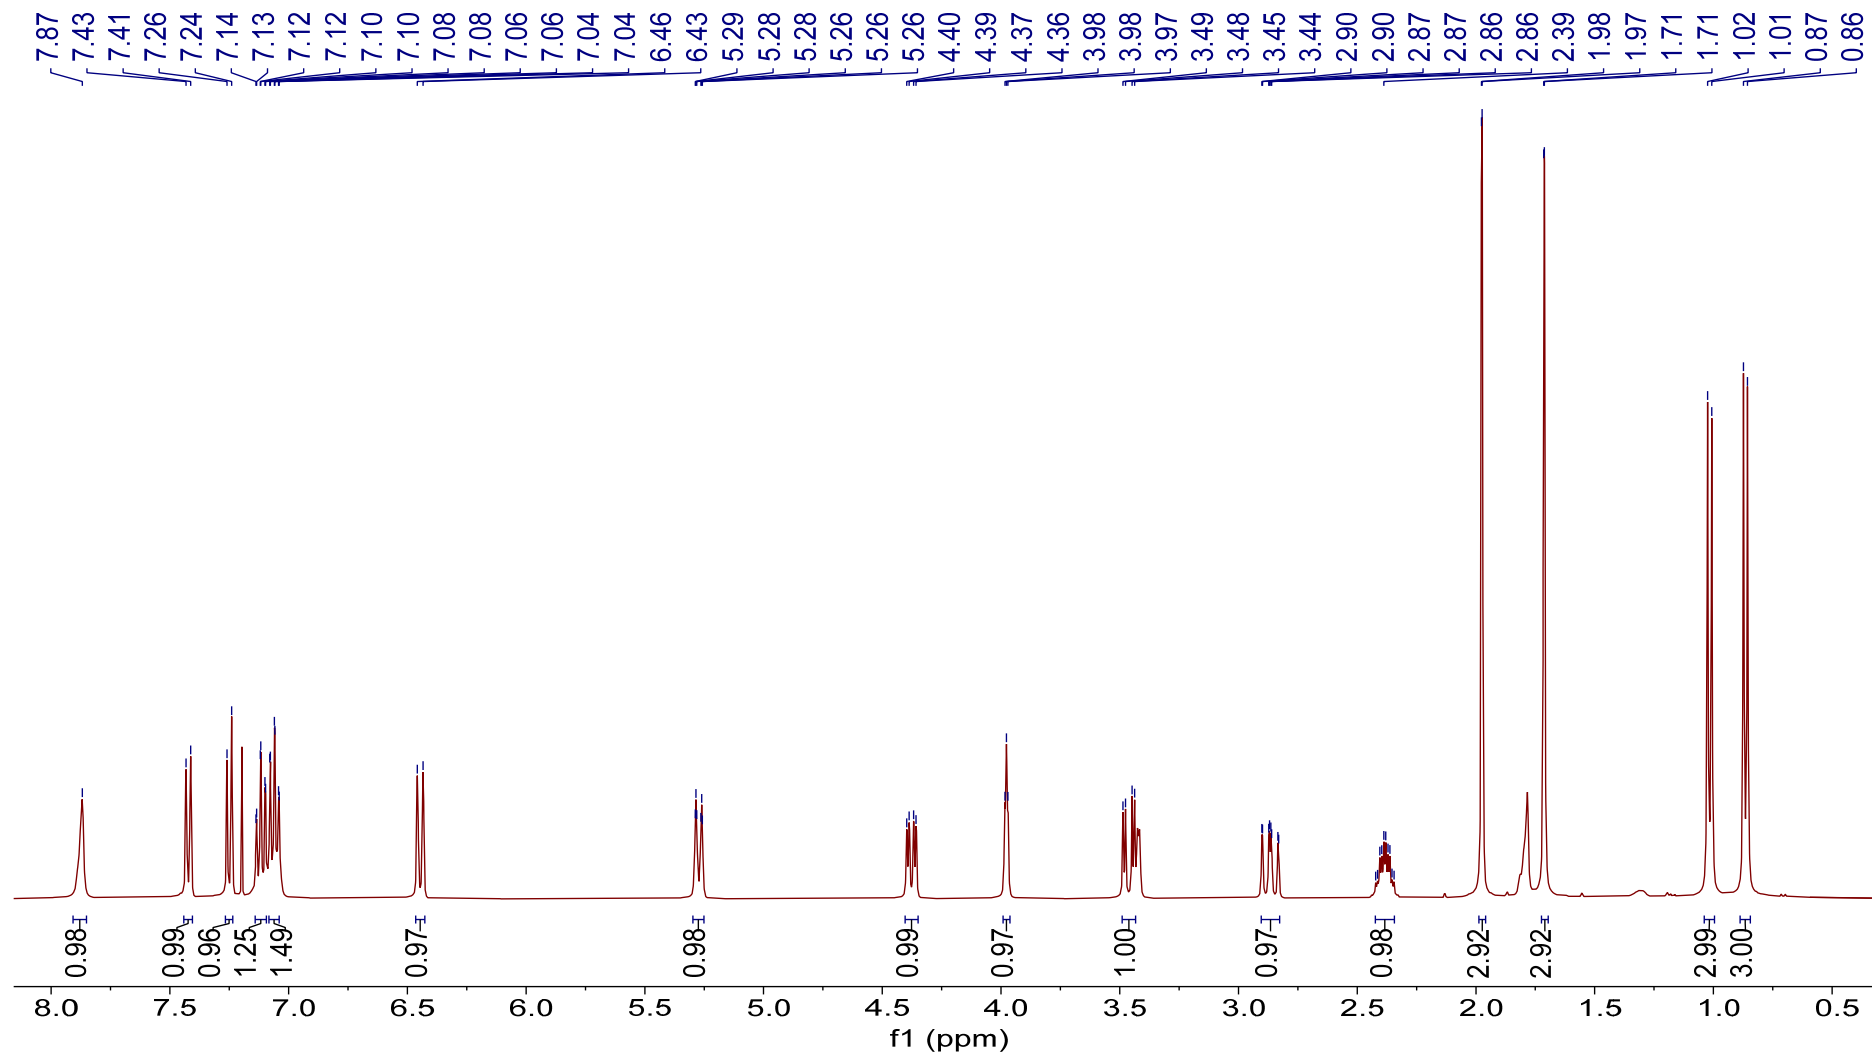

**Figure S8.**  $^{13}\text{C}$  NMR spectra of compound **1** (in  $\text{CDCl}_3$ )

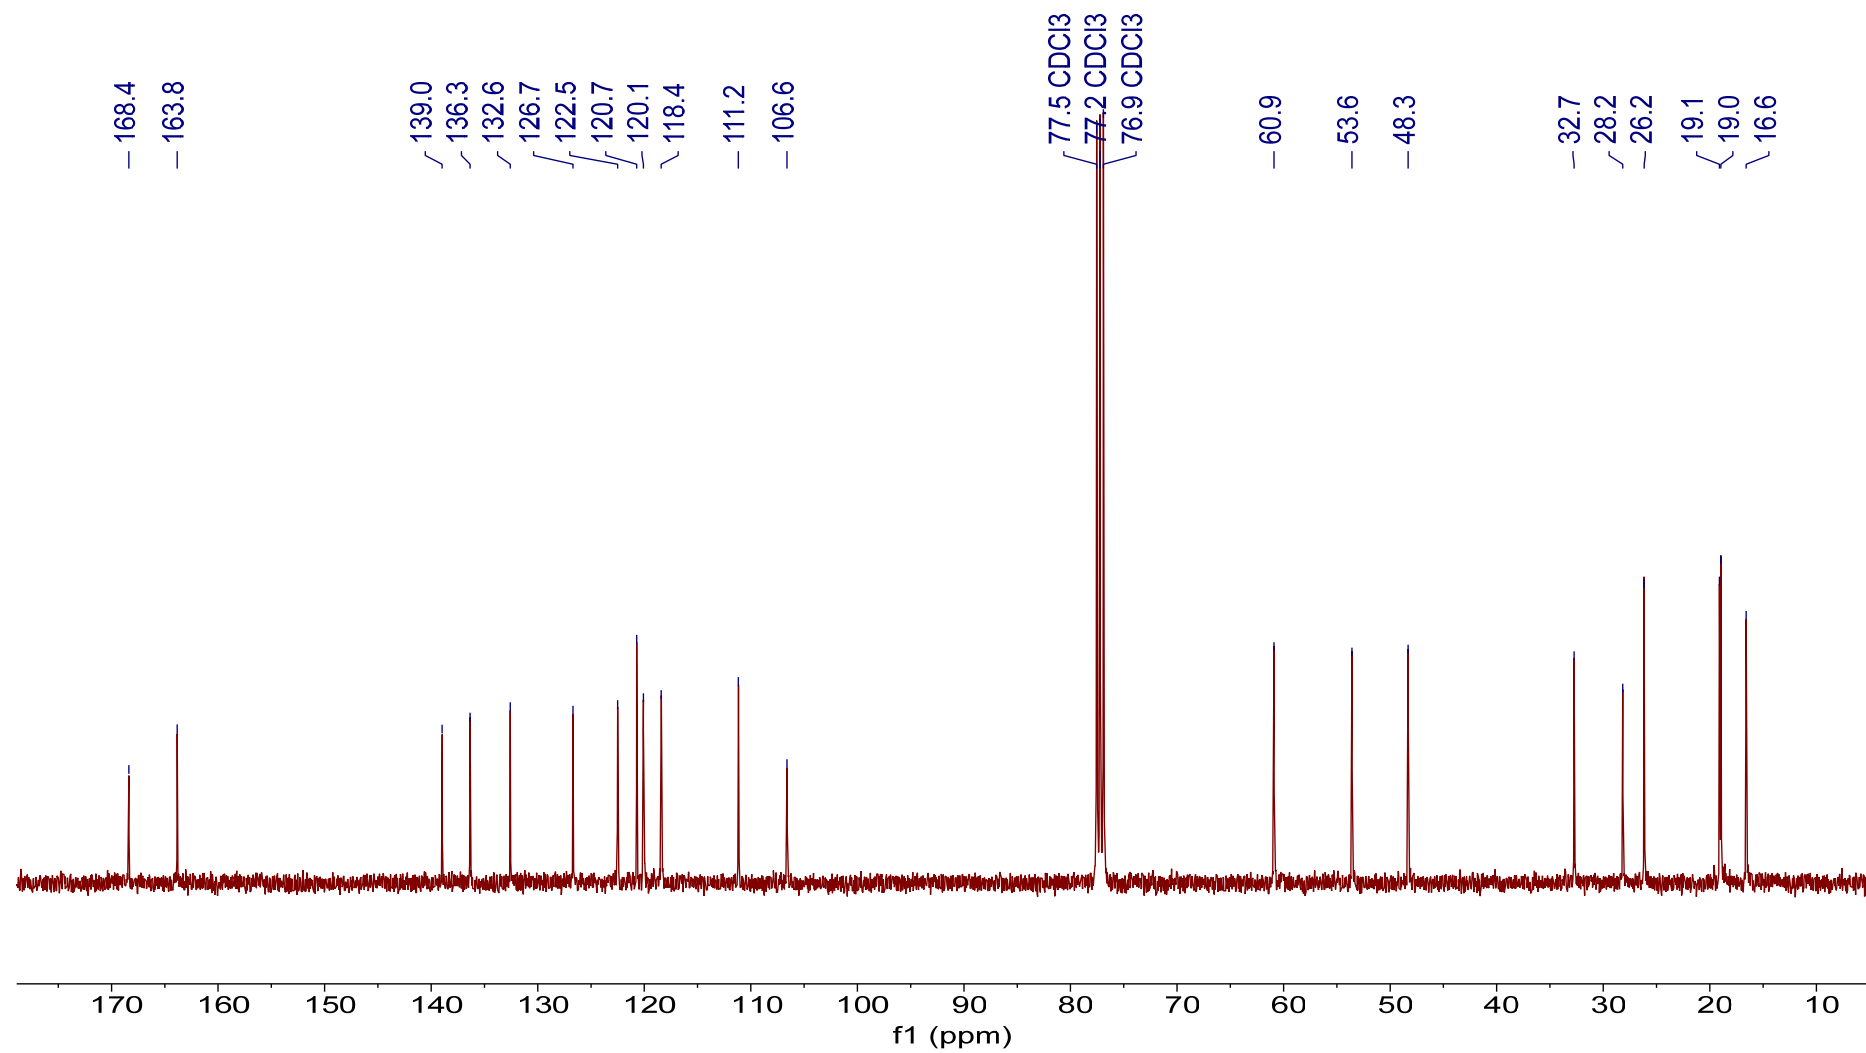

Figure S9. DEPT135 spectrum of compound **1** (in CDCl<sub>3</sub>)

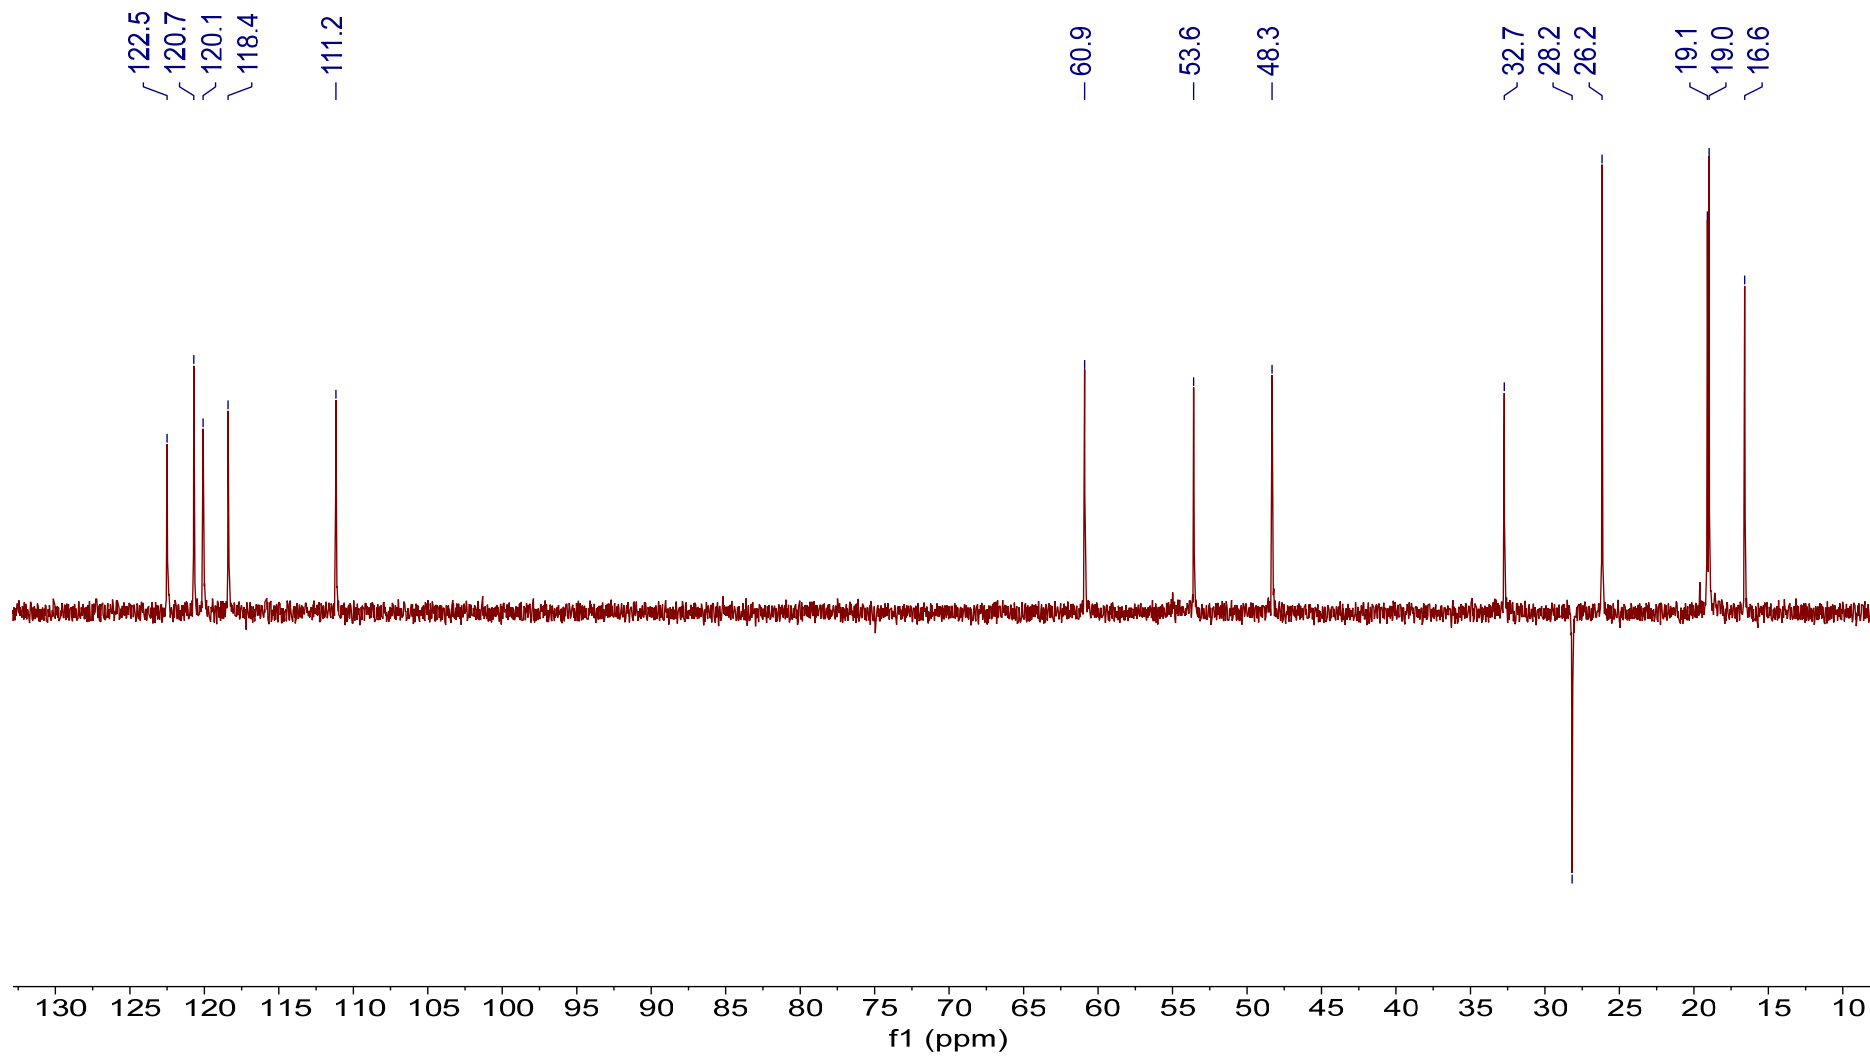

**Figure S10.** HSQC spectrum of compound **1** (in CDCl<sub>3</sub>)

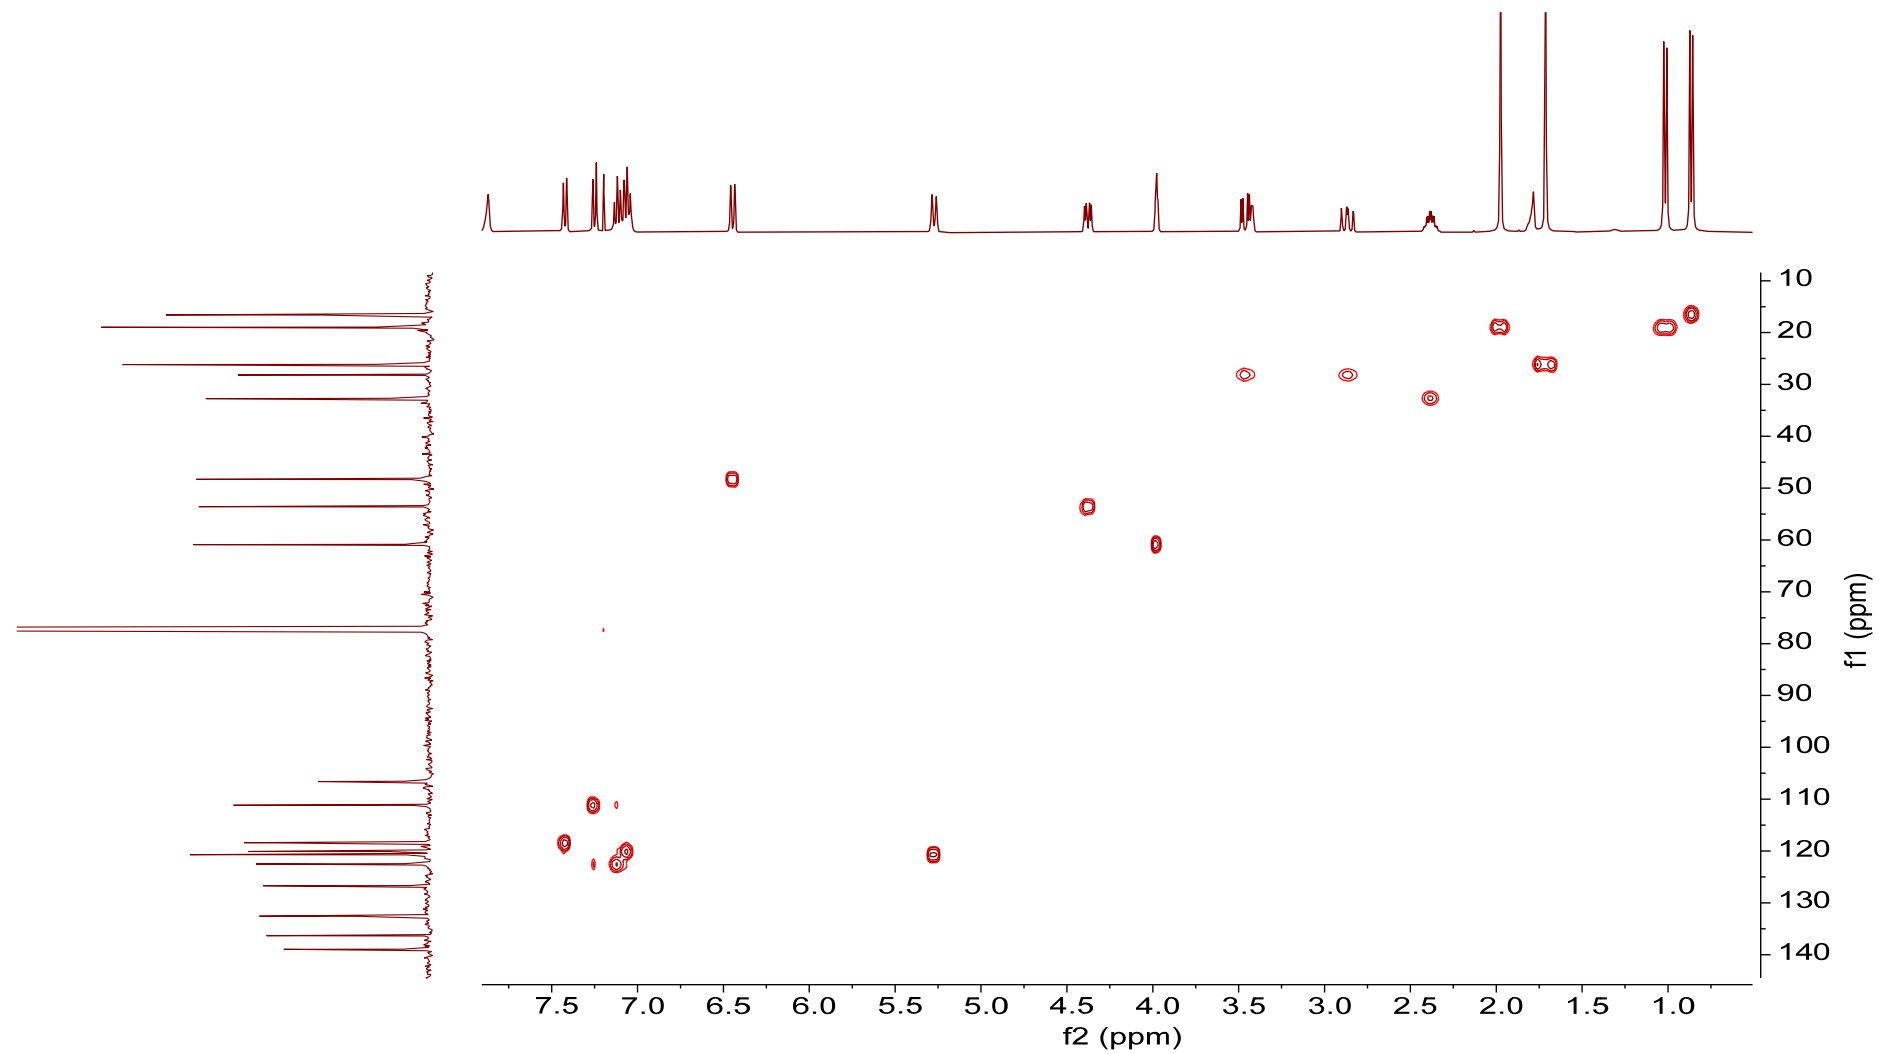

**Figure S11.** HMBC spectrum of compound **1** (in CDCl<sub>3</sub>)

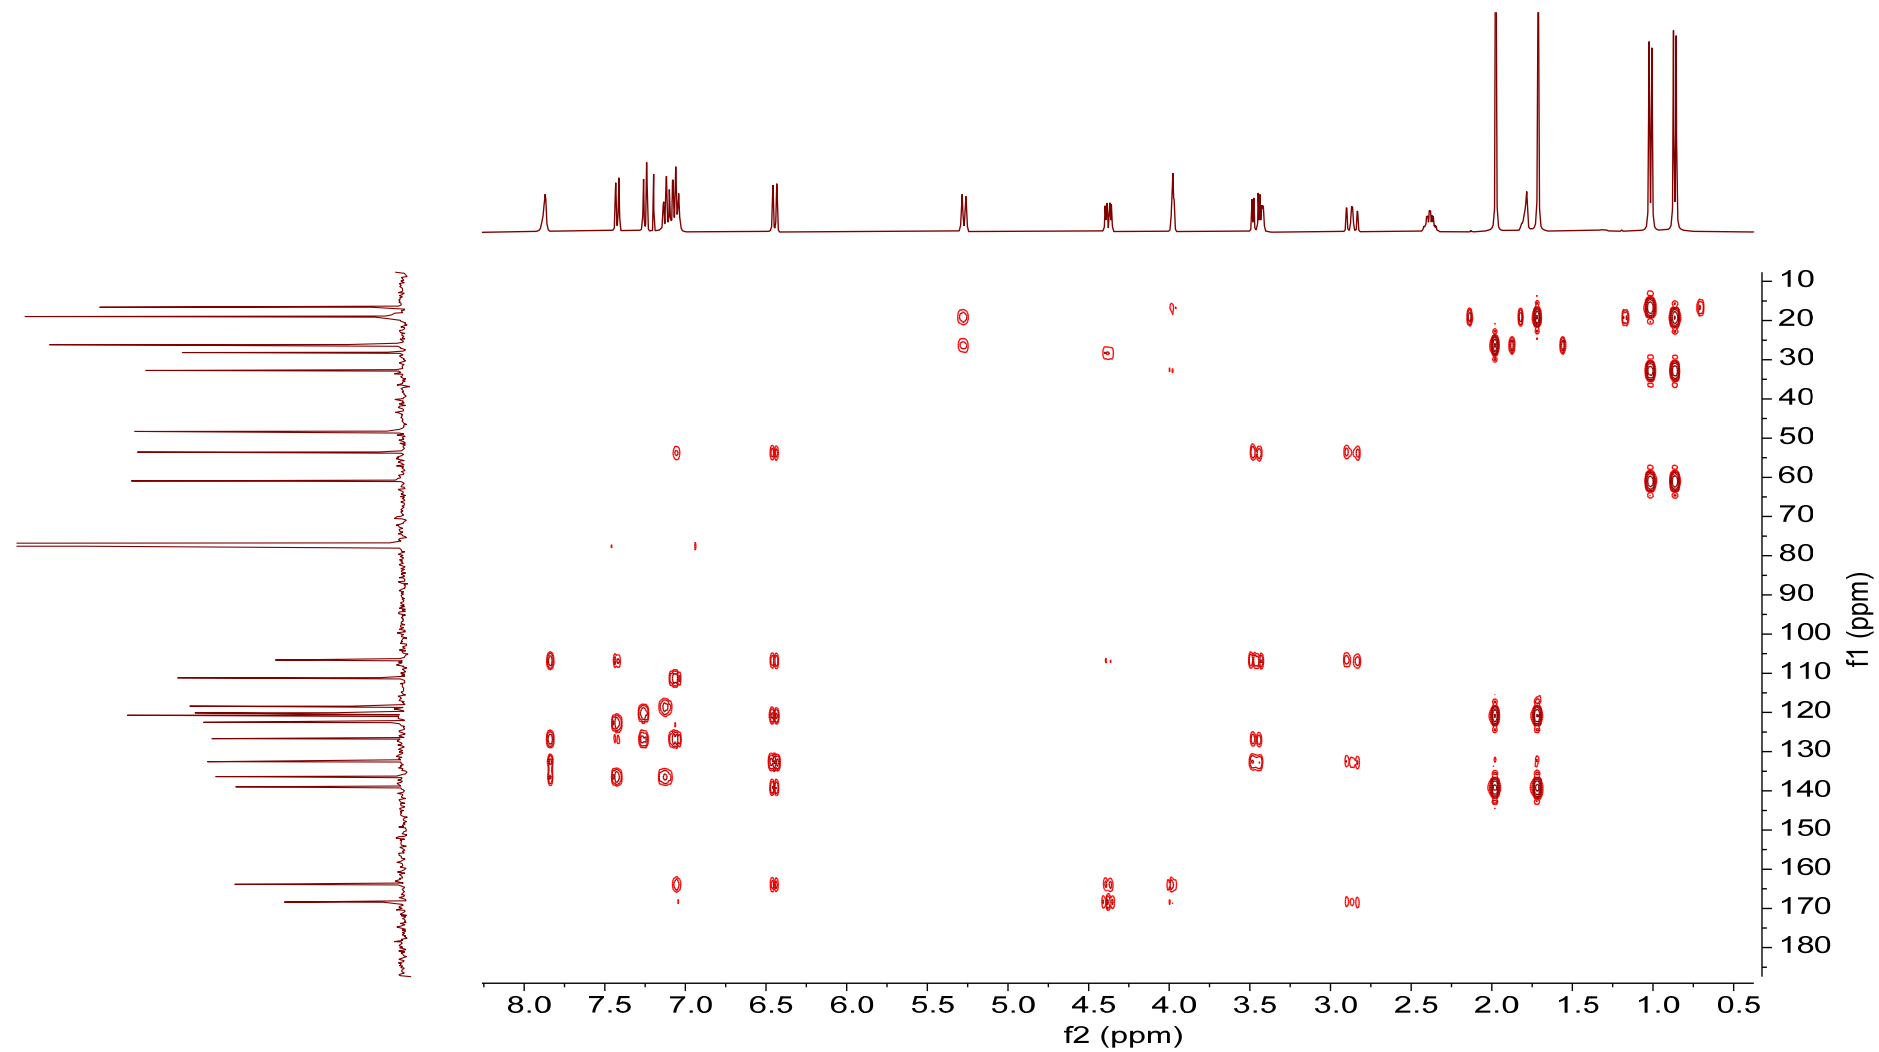

**Figure S12.**  $^1\text{H}$ - $^1\text{H}$  COSY spectrum of compound **1** (in  $\text{CDCl}_3$ )

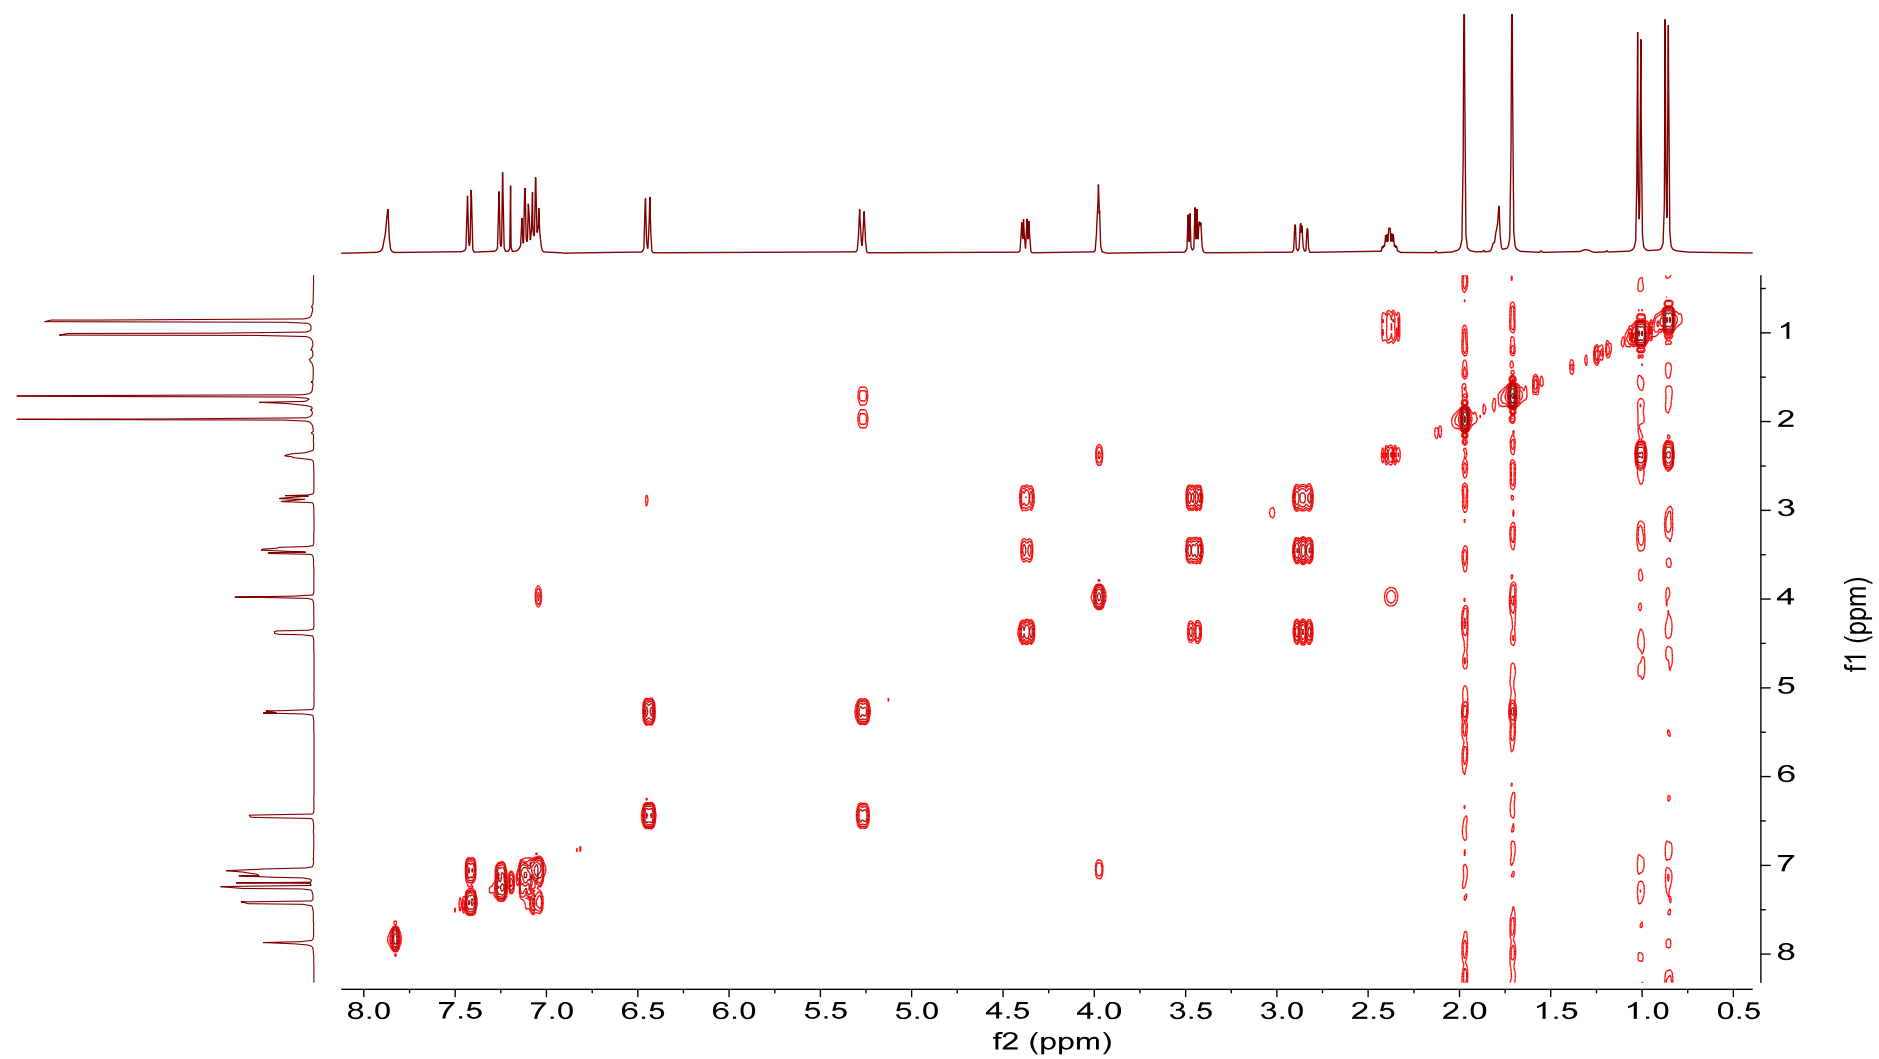

Figure S13. NOESY spectrum of compound **1** (in CDCl<sub>3</sub>)

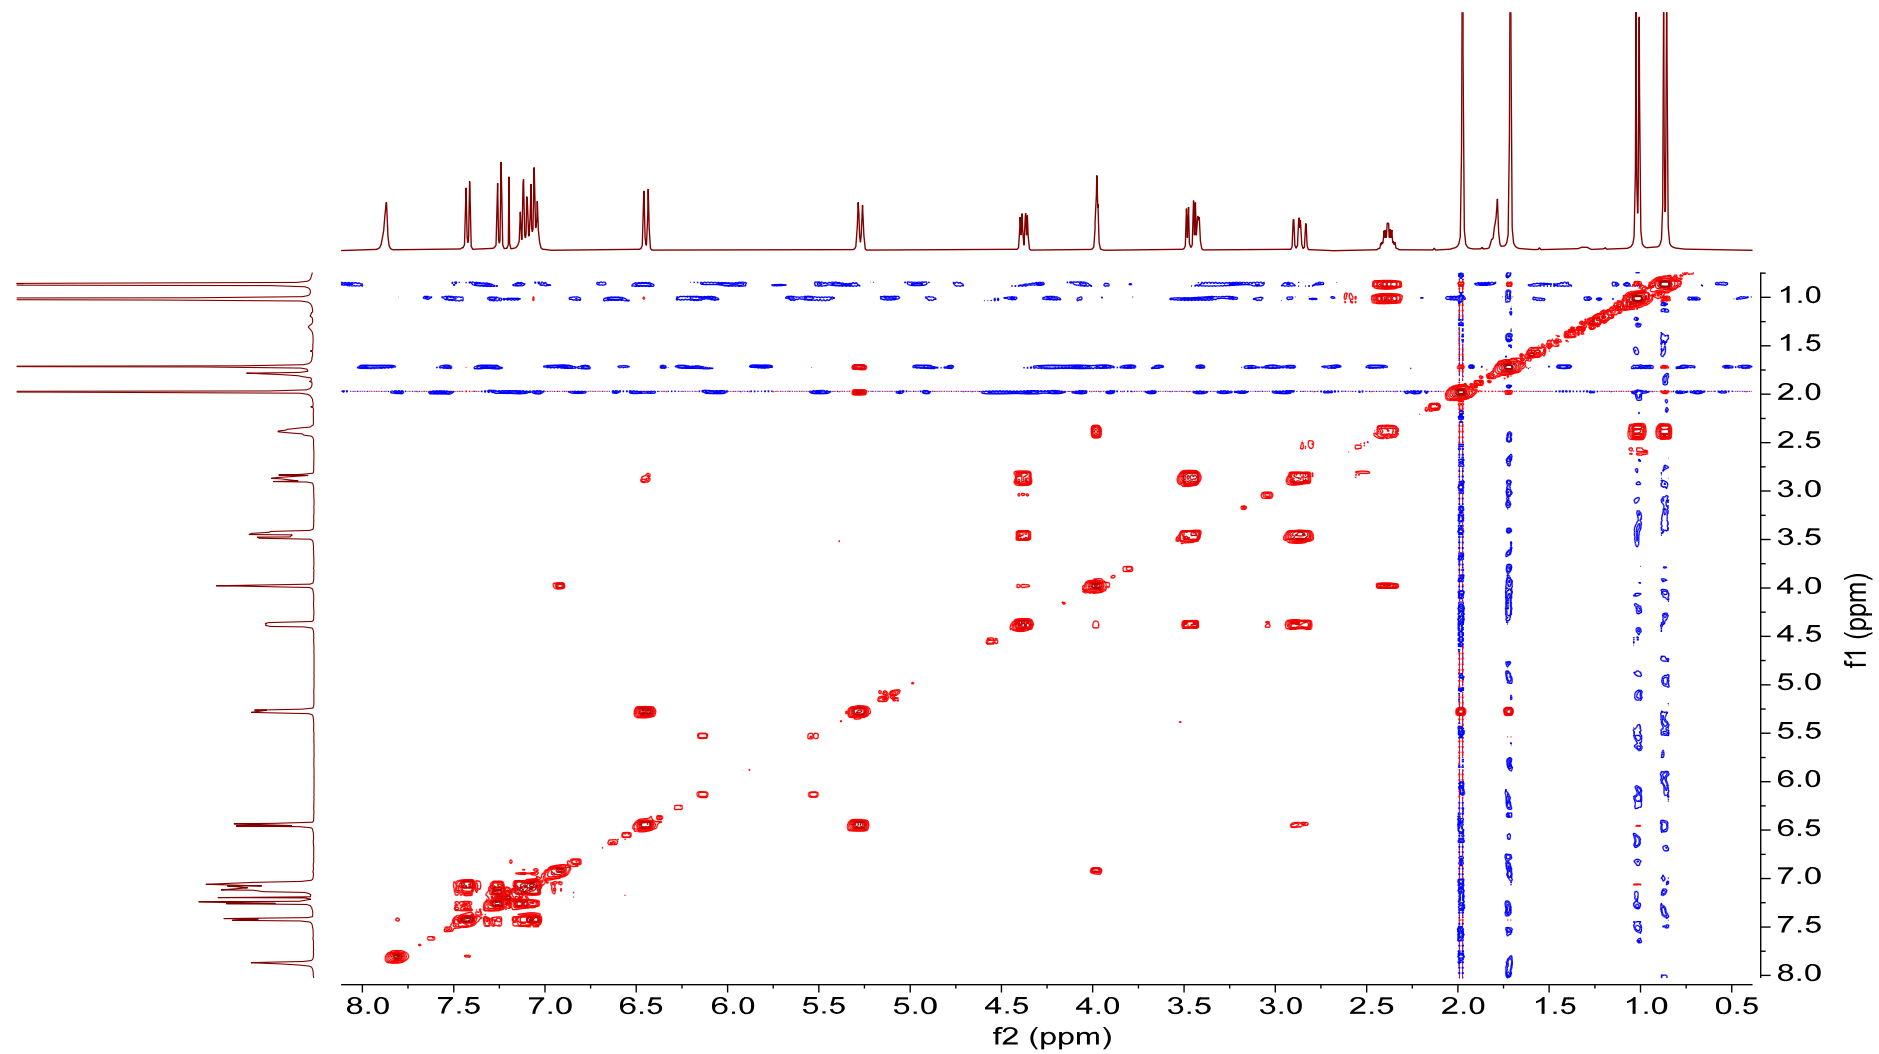

**Figure S14.** HRESIMS of compound **2**

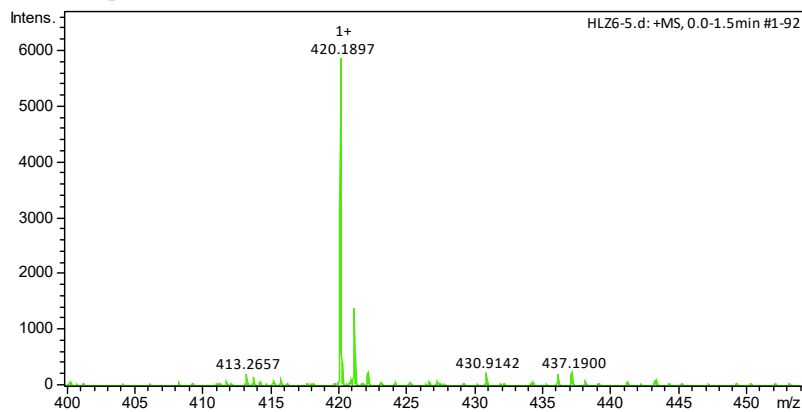

**Figure S15.** UV of compound **2** (in MeOH)

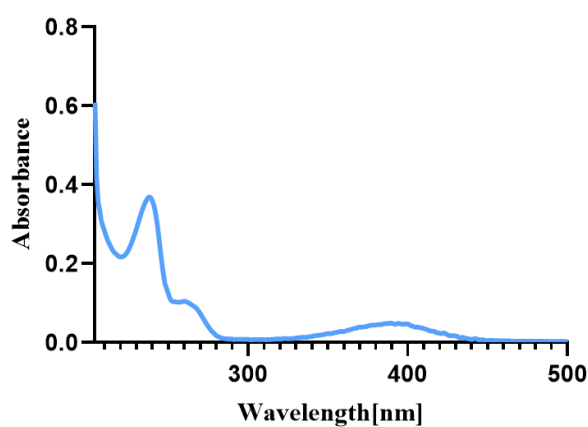

**Figure S16.** IR of compound **2** (KBr disc)

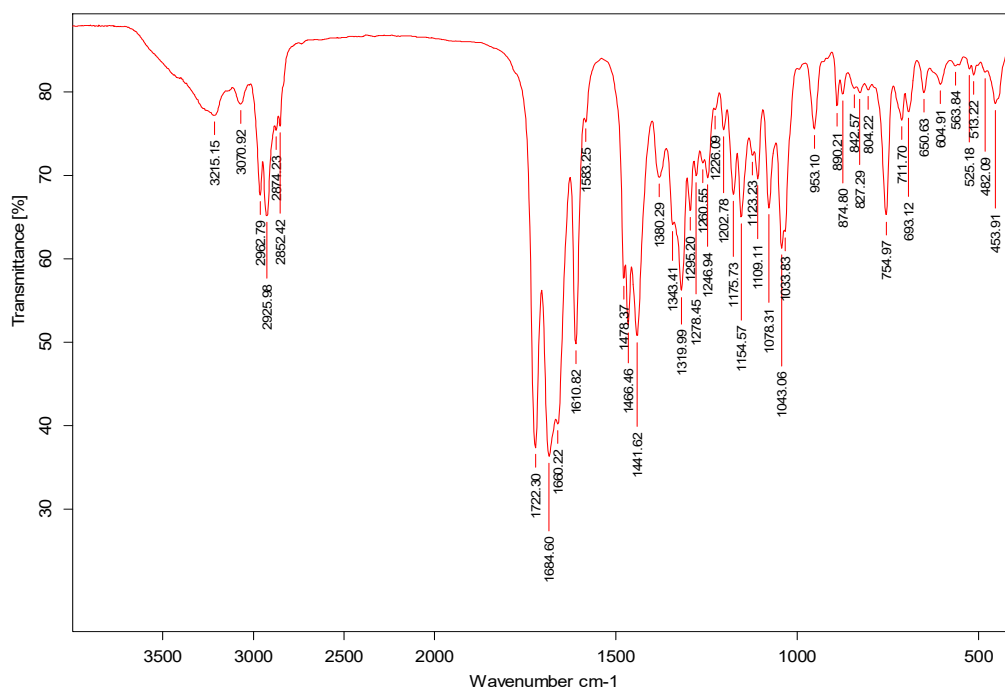

**Figure S17.**  $^1\text{H}$  NMR spectrum of compound **2** (in  $\text{CDCl}_3$ )

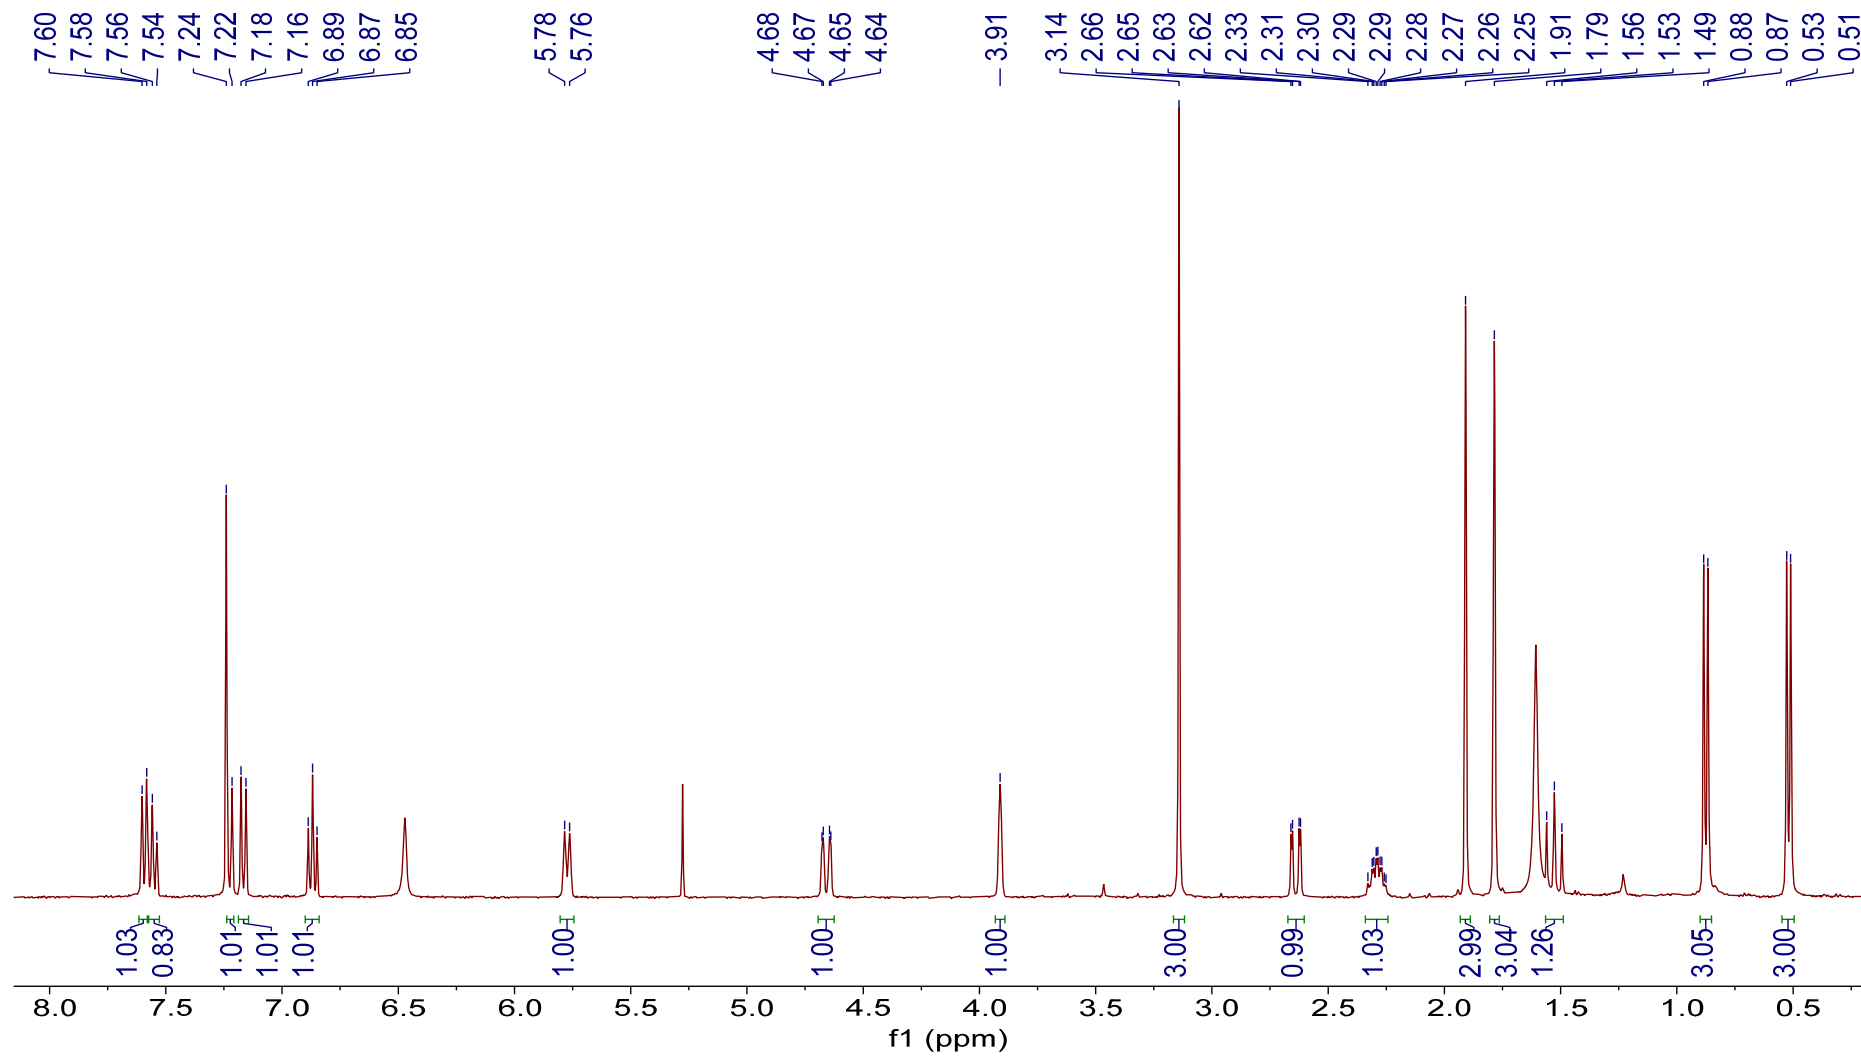

**Figure S18.**  $^{13}\text{C}$  NMR spectrum of compound **2** (in  $\text{CDCl}_3$ )

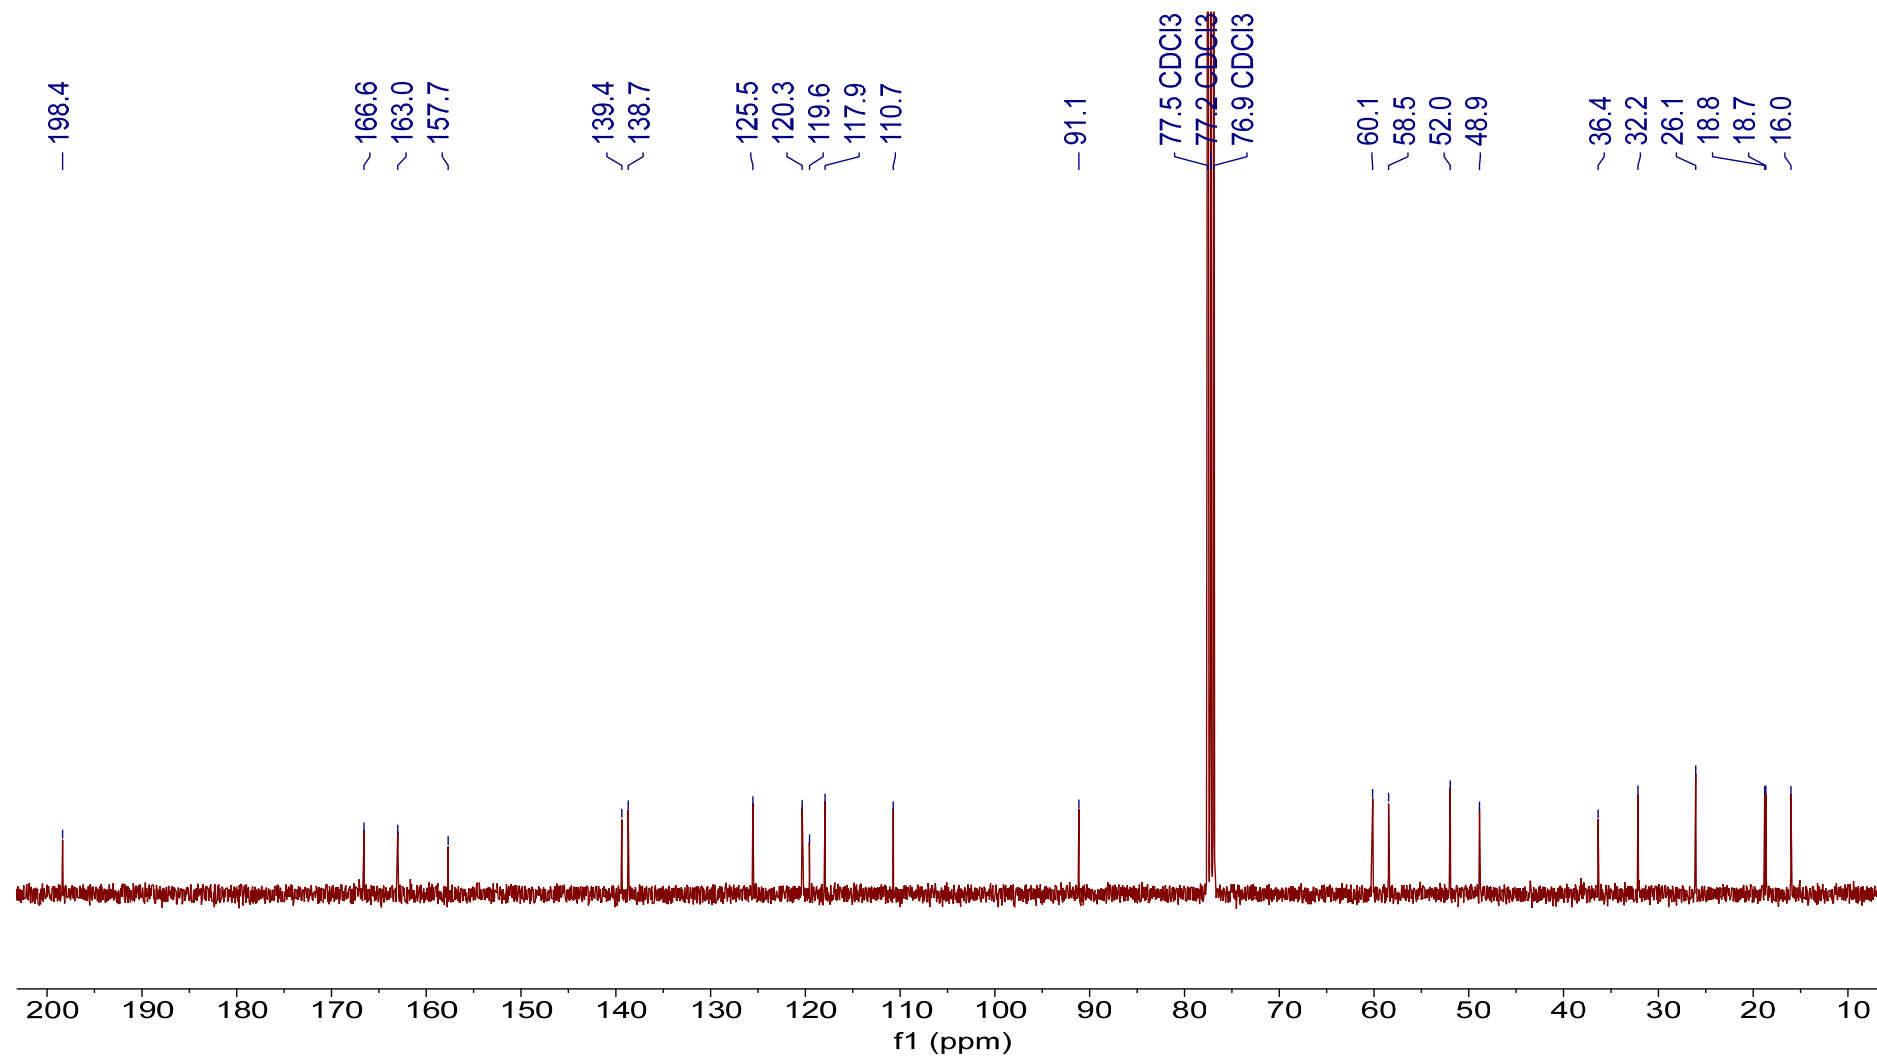

**Figure S19.** DEPT135 spectrum of compound **2** (in CDCl<sub>3</sub>)

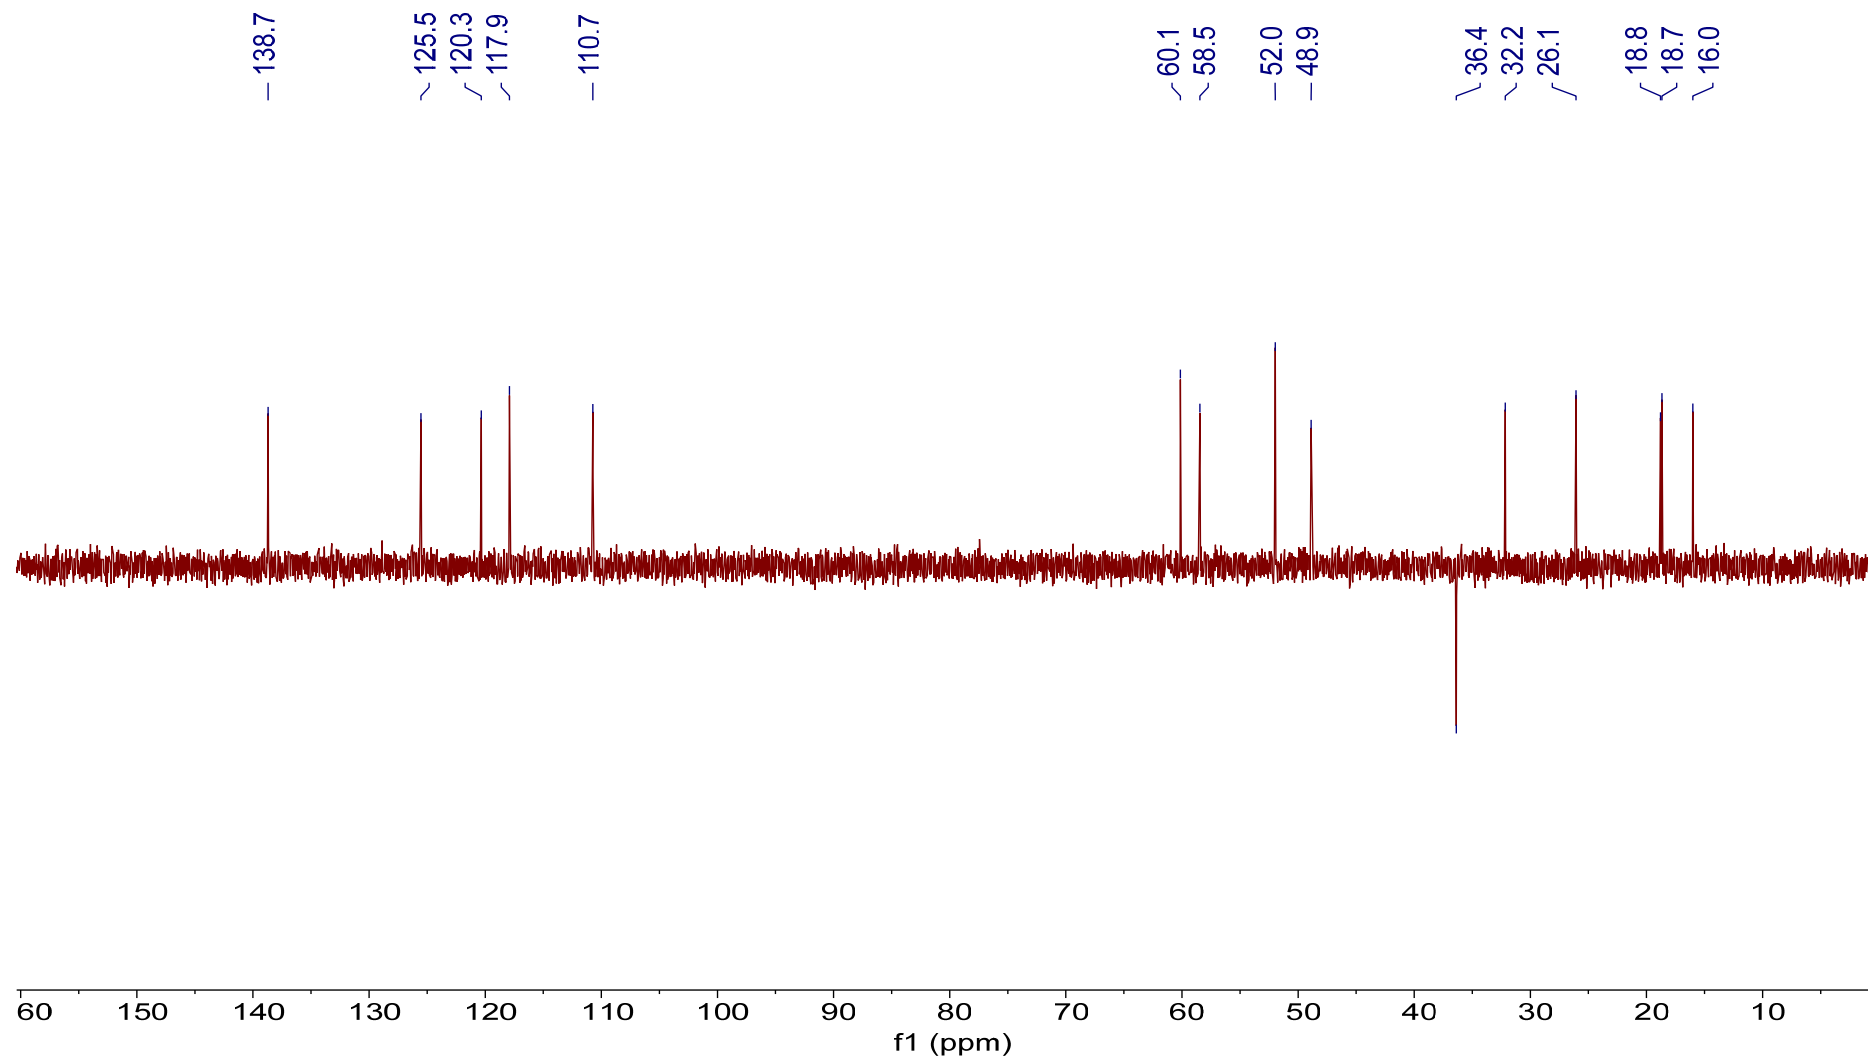

**Figure S20.** HSQC spectrum of compound **2** (in CDCl<sub>3</sub>)

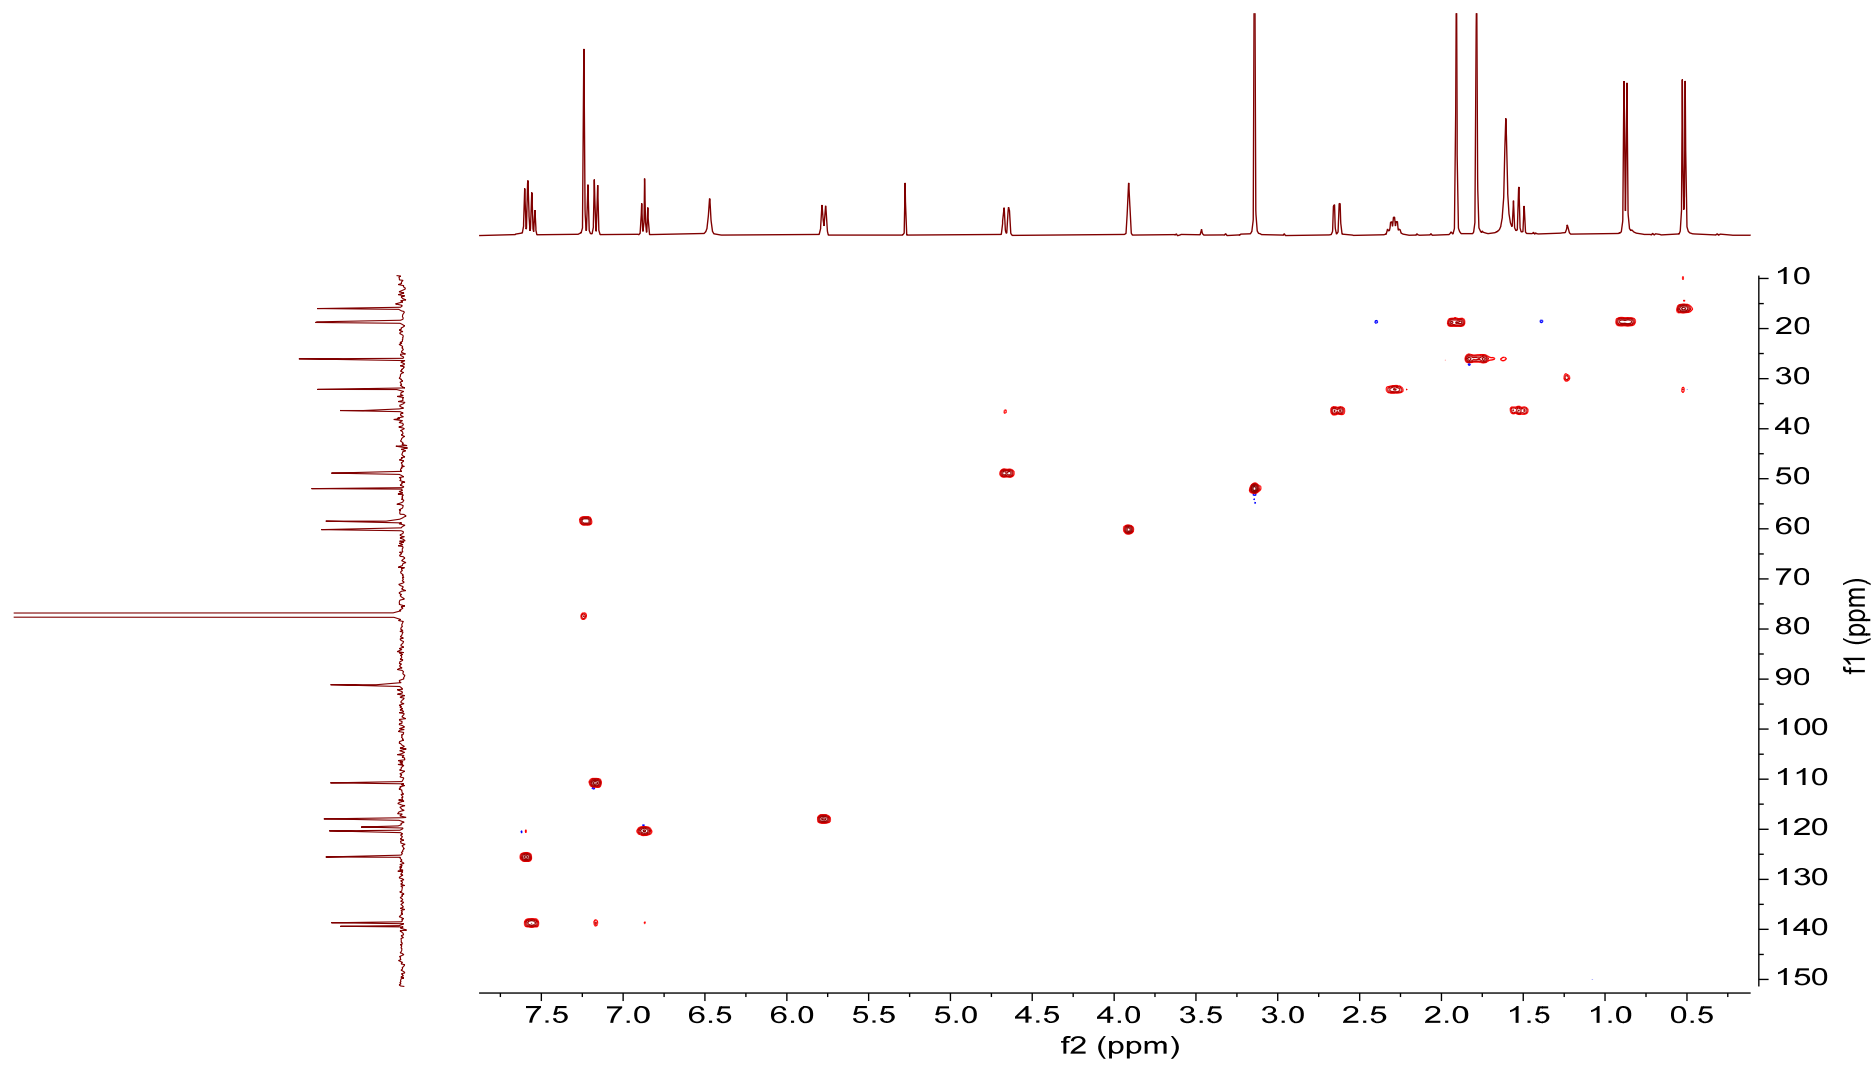

**Figure S21.** HMBC spectrum of compound **2** (in CDCl<sub>3</sub>)

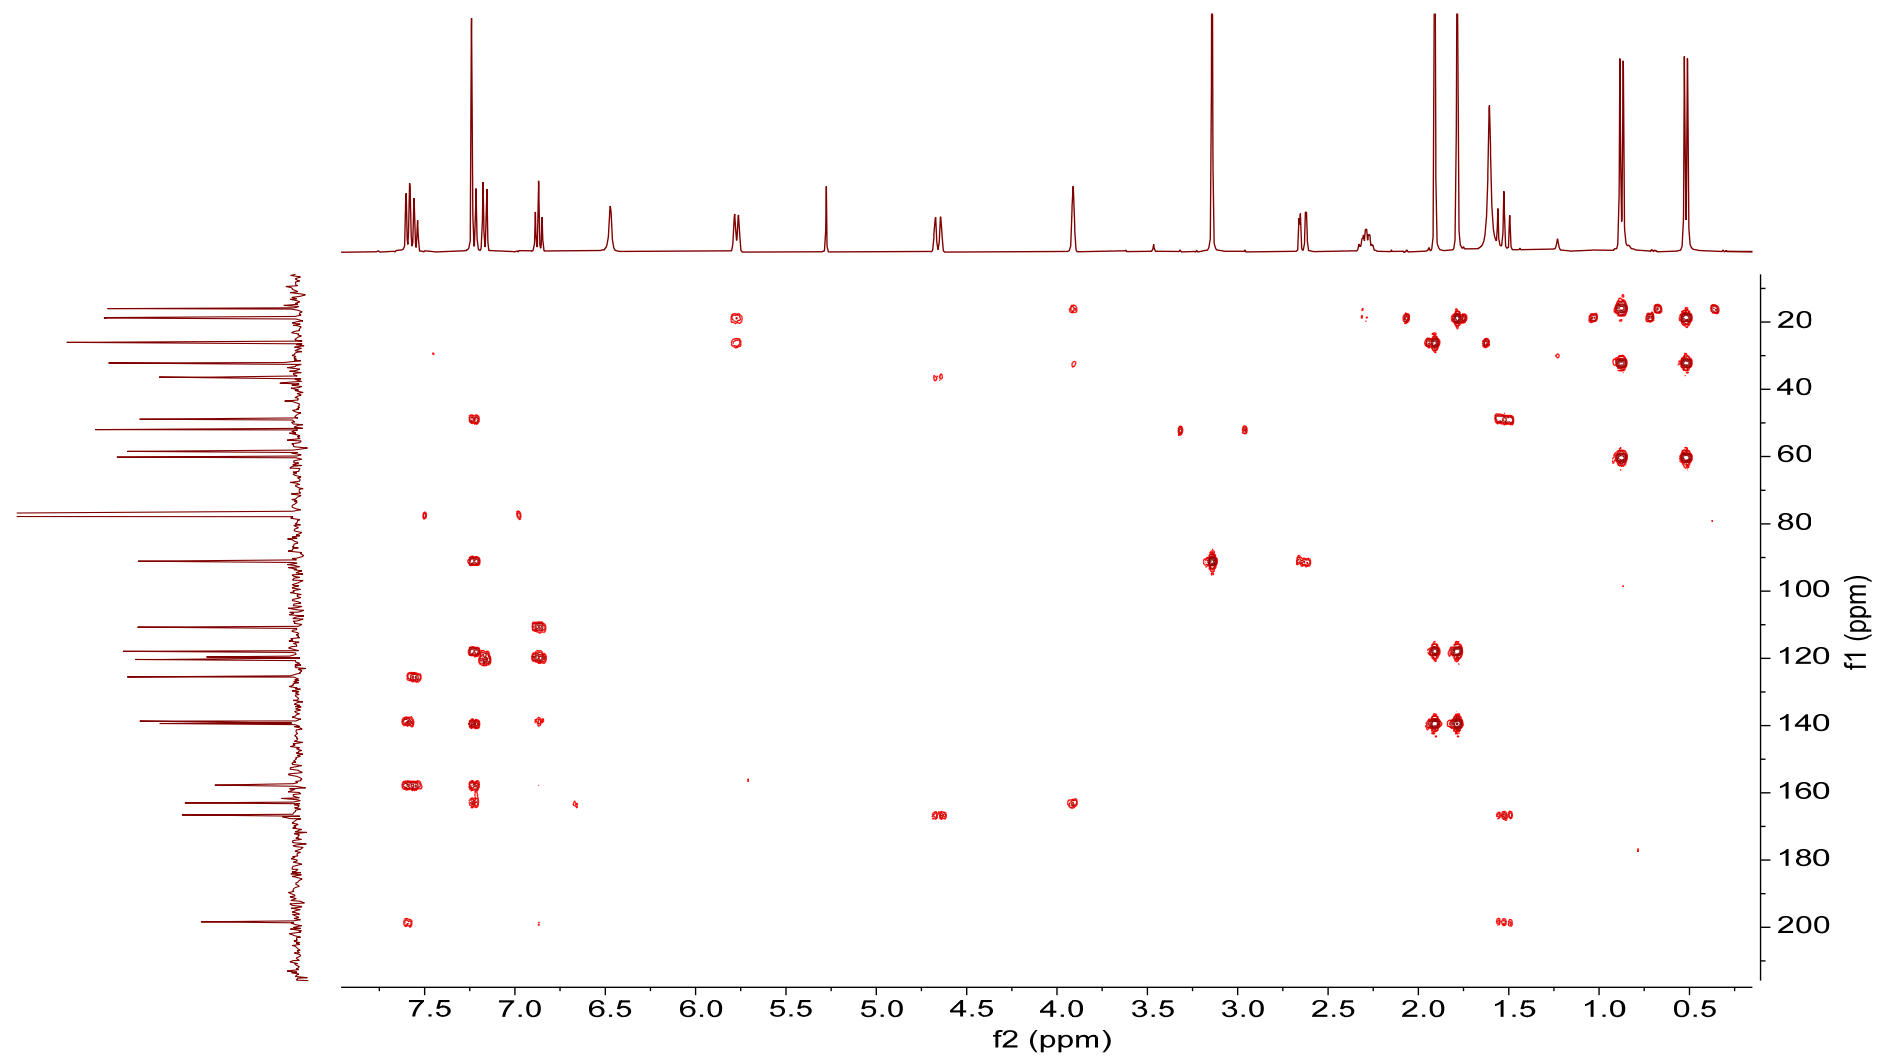

**Figure S22.**  $^1\text{H}$ - $^1\text{H}$  COSY spectrum of compound **2** (in  $\text{CDCl}_3$ )

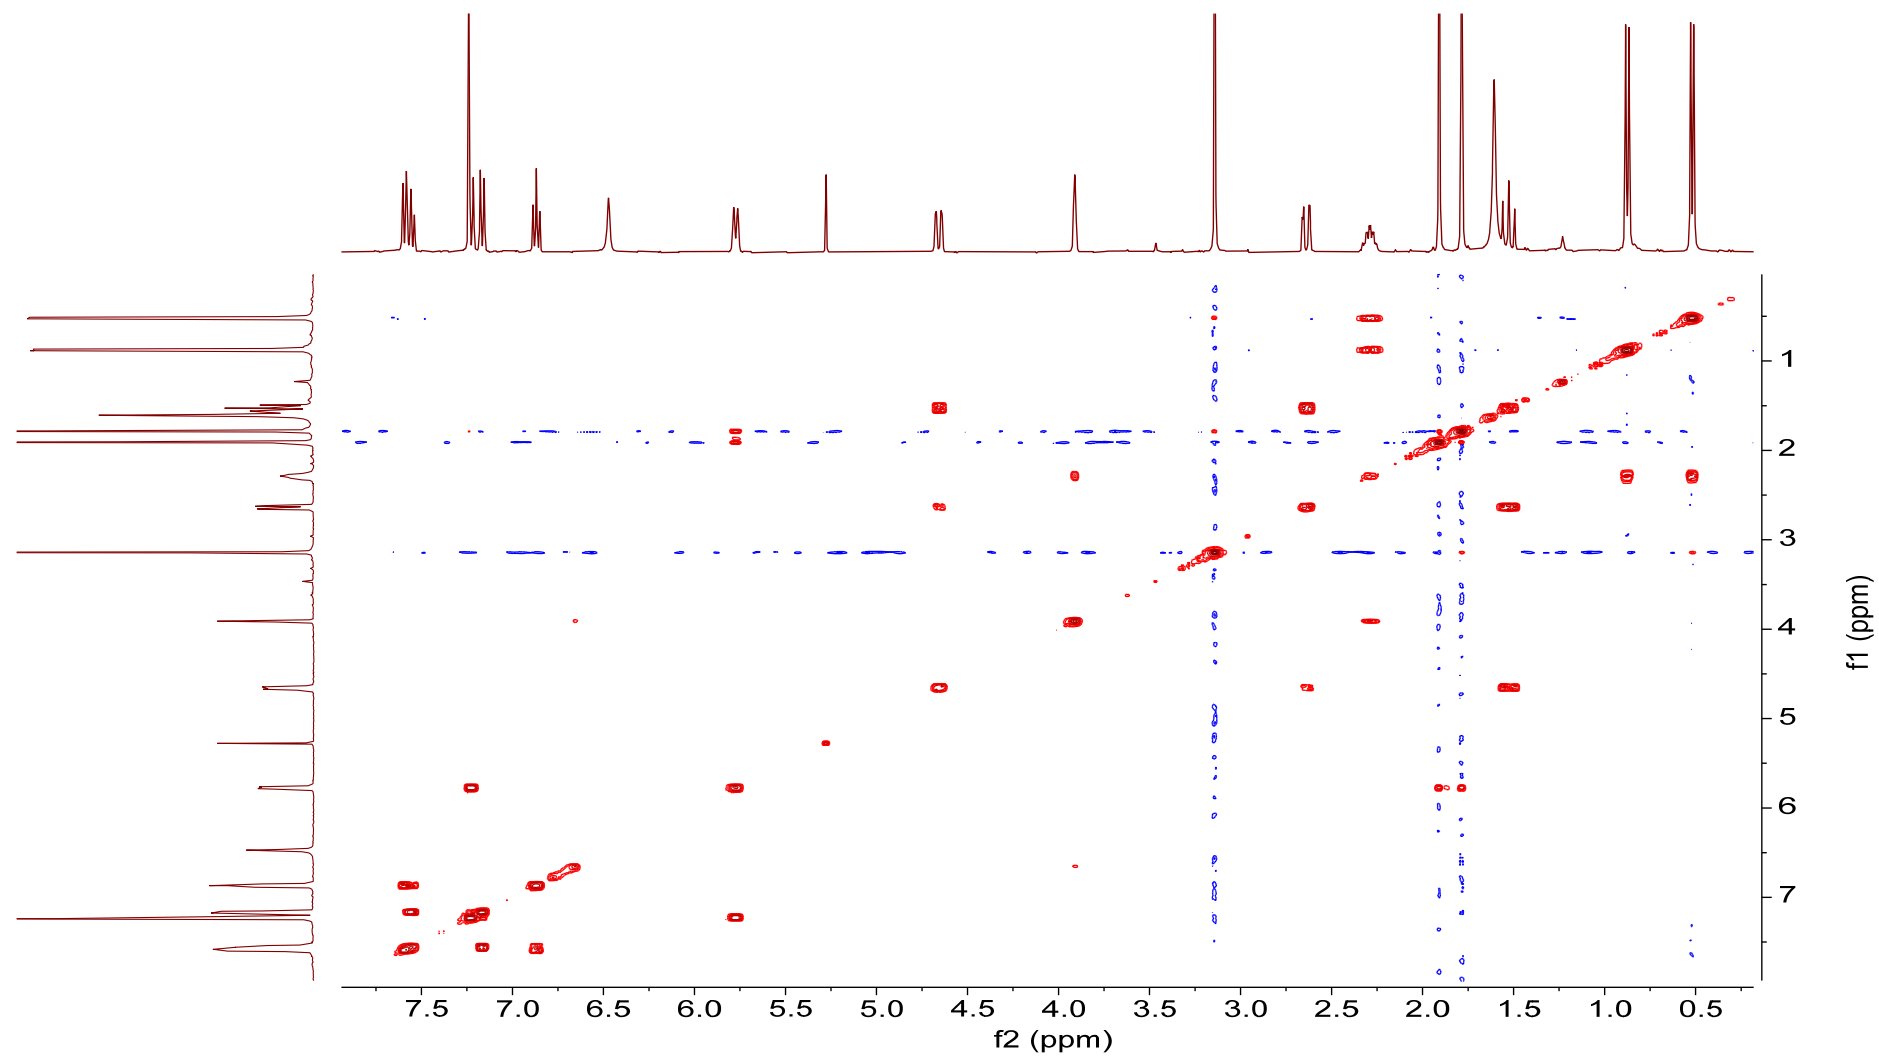

**Figure S23.** NOESY spectrum of compound **2** (in CDCl<sub>3</sub>)

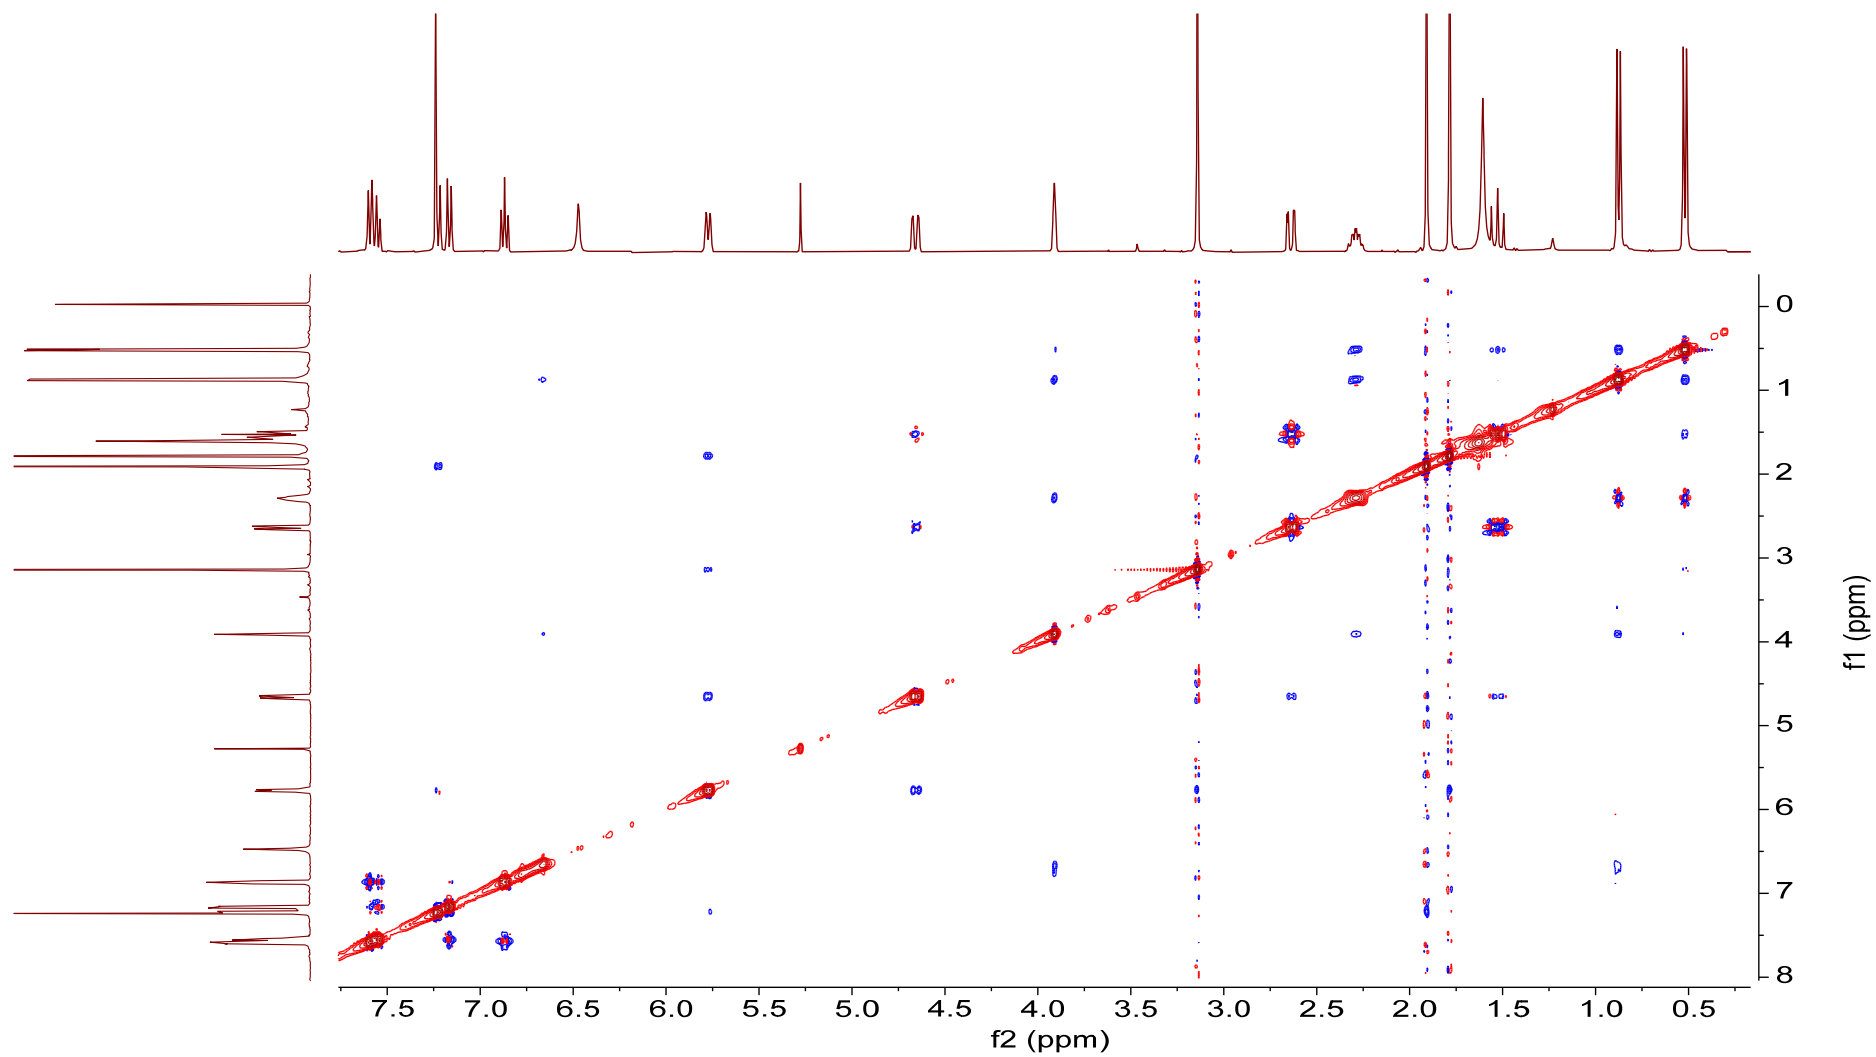

Supplement: s1 [file s1]
